# Supplementary material for: Small-molecule zwitterionic morpholinium sulfonates as non-cytotoxic materials exhibiting LCST thermo-responsive phase separation in water
Source: Royal Society of Chemistry journal article supplement (doi:10.1039/d4ma01029a), 2024-12-28
Supplement: d4ma01029a1.pdf [file d4ma01029a1.pdf]

**Small-molecule, zwitterionic morpholinium sulfonates are non-cytotoxic materials  
exhibiting LCST thermo-responsive phase separation in water**

Yu-Hsin Chung,<sup>a</sup> Jianbo Jia,<sup>b</sup> Wen-Yi Chen,<sup>a</sup> Pin-Hsuan Chen,<sup>a</sup> Bing Yan<sup>\*,b</sup> and Yen-  
Ho Chu<sup>\*,a</sup>

<sup>a</sup> Department of Chemistry and Biochemistry, National Chung Cheng University,  
Chiayi, Taiwan 62102, ROC

<sup>b</sup> Institute of Environmental Research at Greater Bay Area, Key Laboratory for Water  
Quality and Conservation of the Pearl River Delta, Ministry of Education, Guangzhou  
University, Guangzhou 510006, China

\*To whom correspondence should be addressed.

Professor Bing Yan, E-mail: [drbingyan@gzhu.edu.cn](mailto:drbingyan@gzhu.edu.cn)

Professor Yen-Ho Chu, E-mail: [cheyhc@ccu.edu.tw](mailto:cheyhc@ccu.edu.tw)

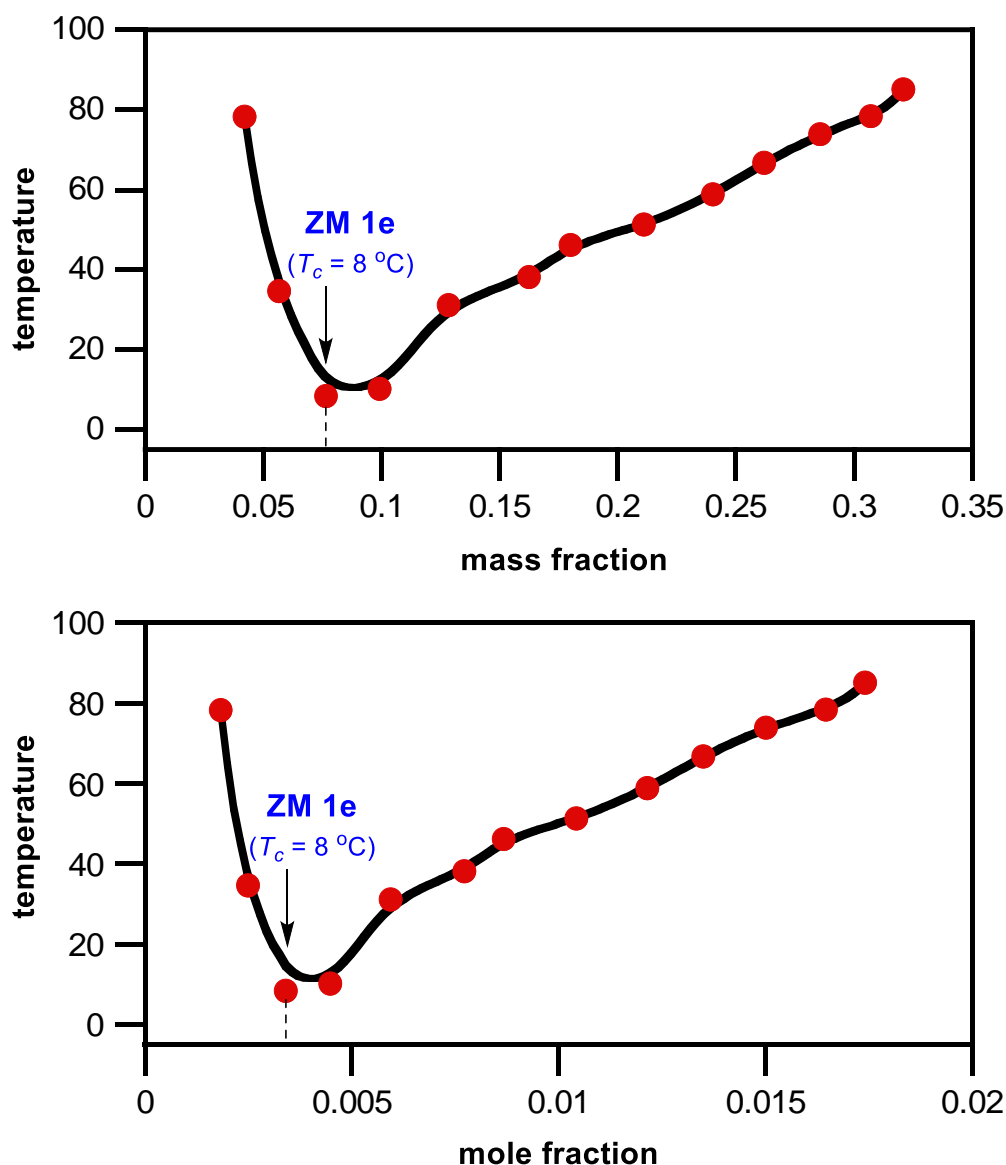

**Figure S1.** Phase diagrams (both  $T_c$  vs. mass fraction and  $T_c$  vs. mole fraction) of water mixtures with **ZM 1e**. Solid lines are used as the guide for the eye. This figure shows the phase diagrams of a mixture of water with **ZM 1e**, confirming a typical bowl-shaped curve with the lowest critical temperature ( $T_c = 8$  °C) near its mass ratio of 1:13 and mole ratio of 1:294 (**ZM 1e** / H<sub>2</sub>O).

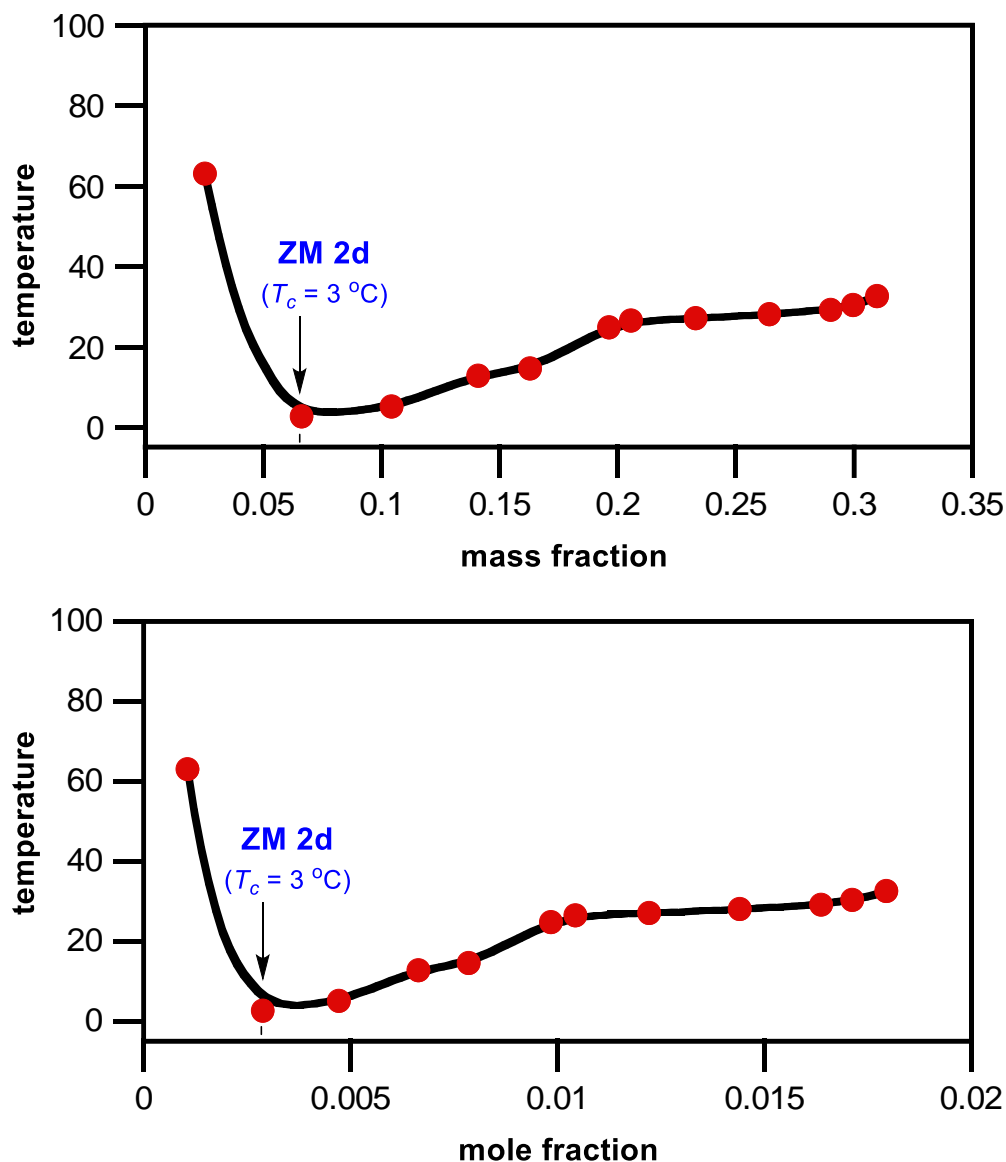

**Figure S2.** Phase diagrams (both  $T_c$  vs. mass fraction and  $T_c$  vs. mole fraction) of water mixtures with **ZM 2d**. Solid lines are used as the guide for the eye. This figure shows the phase diagrams of a mixture of water with **ZM 2d**, confirming a typical bowl-shaped curve with the lowest critical temperature ( $T_c = 3\text{ °C}$ ) near its mass ratio of 1:15 and mole ratio of 1:347 (**ZM 2d** / H<sub>2</sub>O).

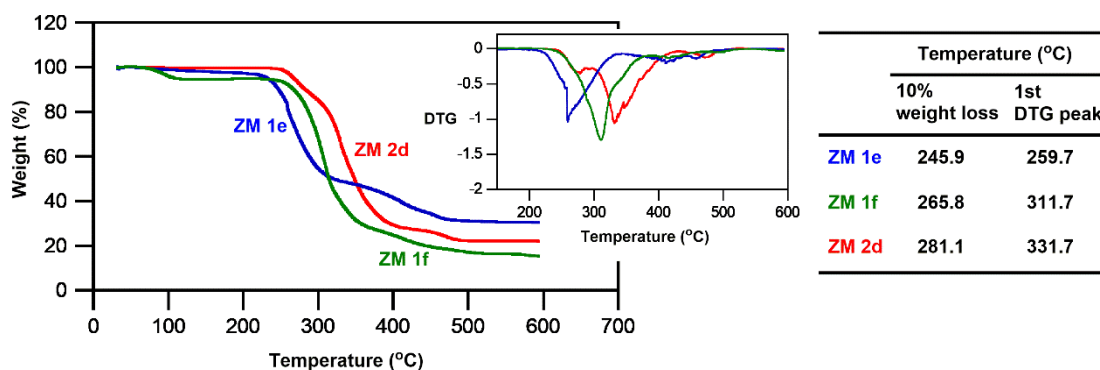

**Figure S3.** Thermogravimetric analysis (TGA) of representative **ZM 1e**, **ZM 1f**, and **ZM 2d** zwitterionic materials exhibiting thermoresponsiveness with water was measured under nitrogen at a heating rate of  $20\text{ }^{\circ}\text{C}\cdot\text{min}^{-1}$ . Inset: derivative thermogravimetry (DTG) curves of **ZM 1e**, **ZM 1f**, and **ZM 2d** with their first DTG peak at 260, 312, and 332  $^{\circ}\text{C}$ , respectively. Thermal analyses were carried out using a PerkinElmer STA 6000 thermogravimetric analyzer (PerkinElmer, Waltham, MA, USA).

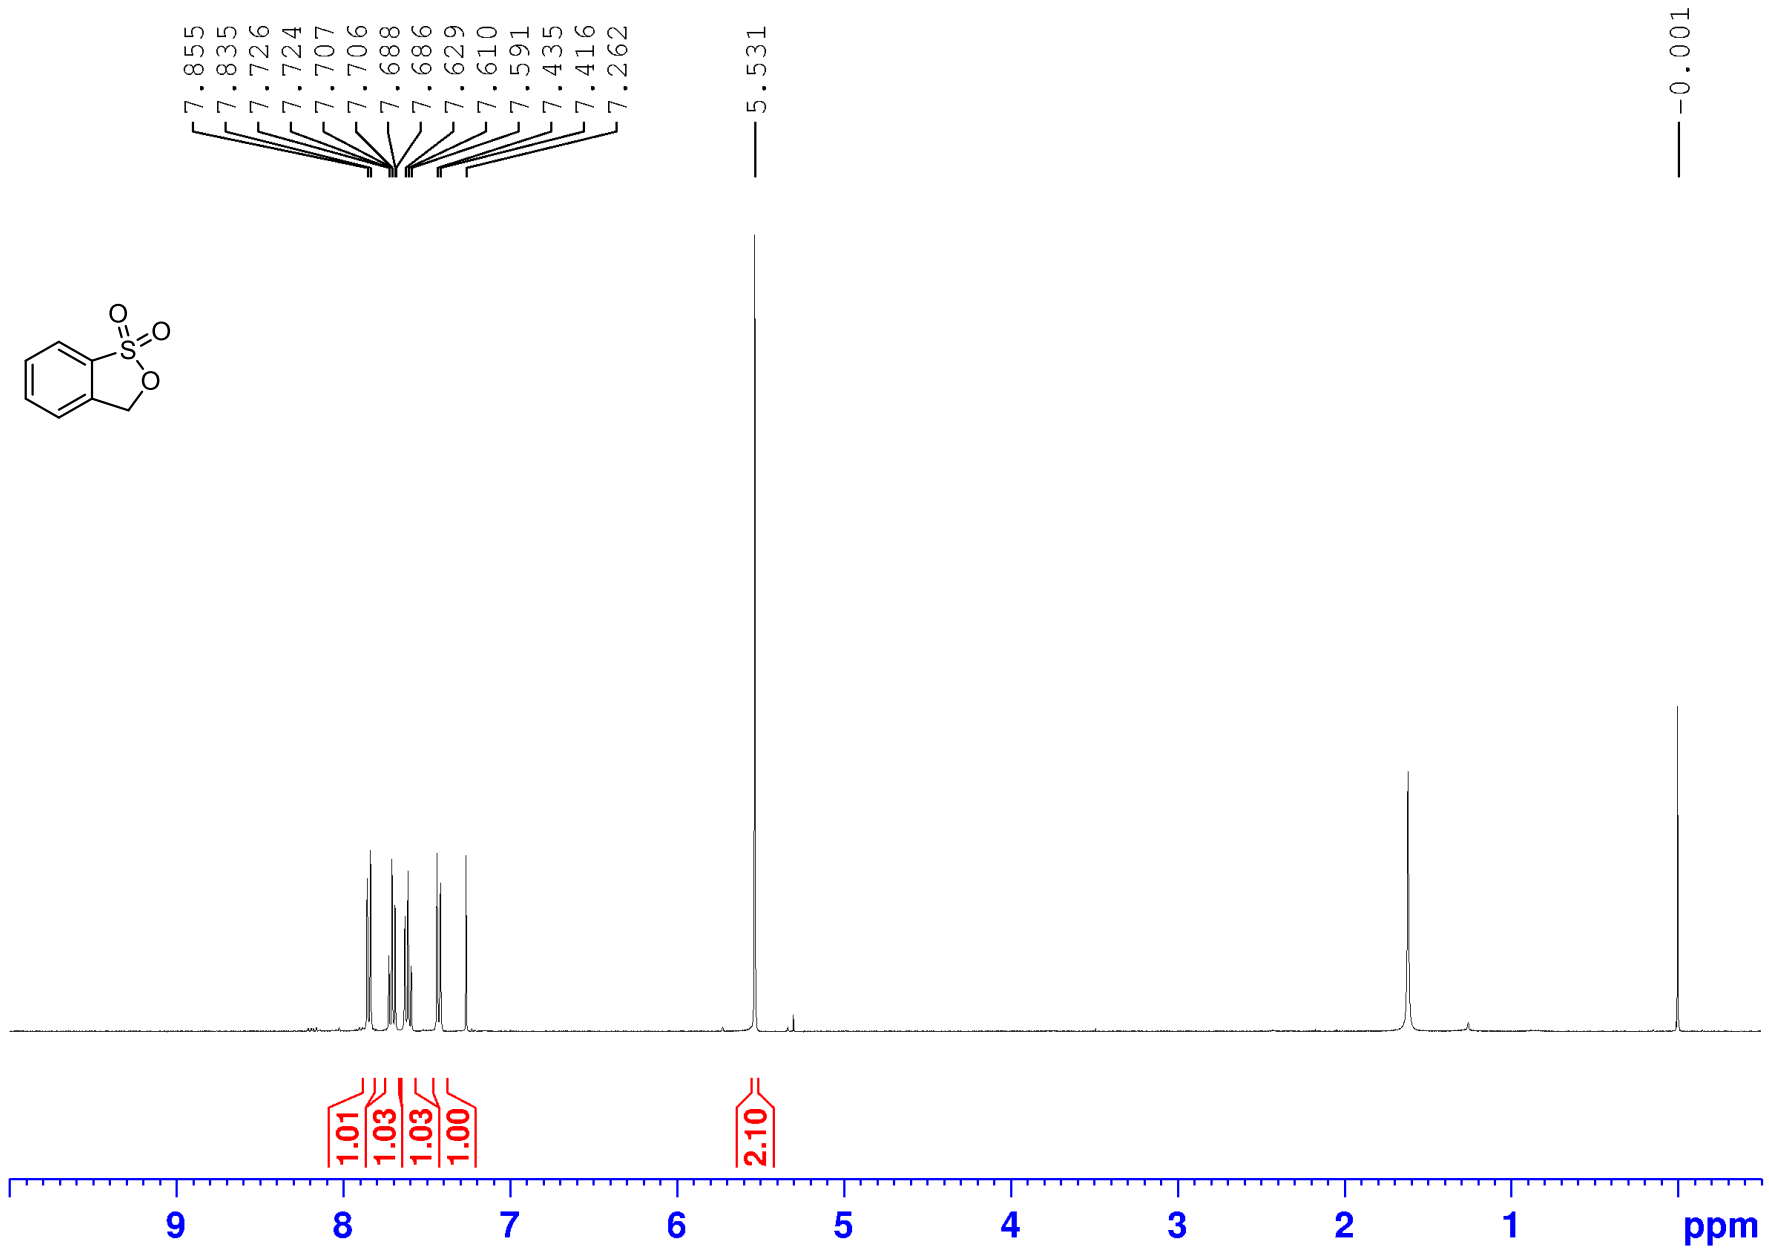

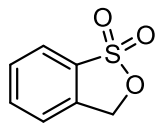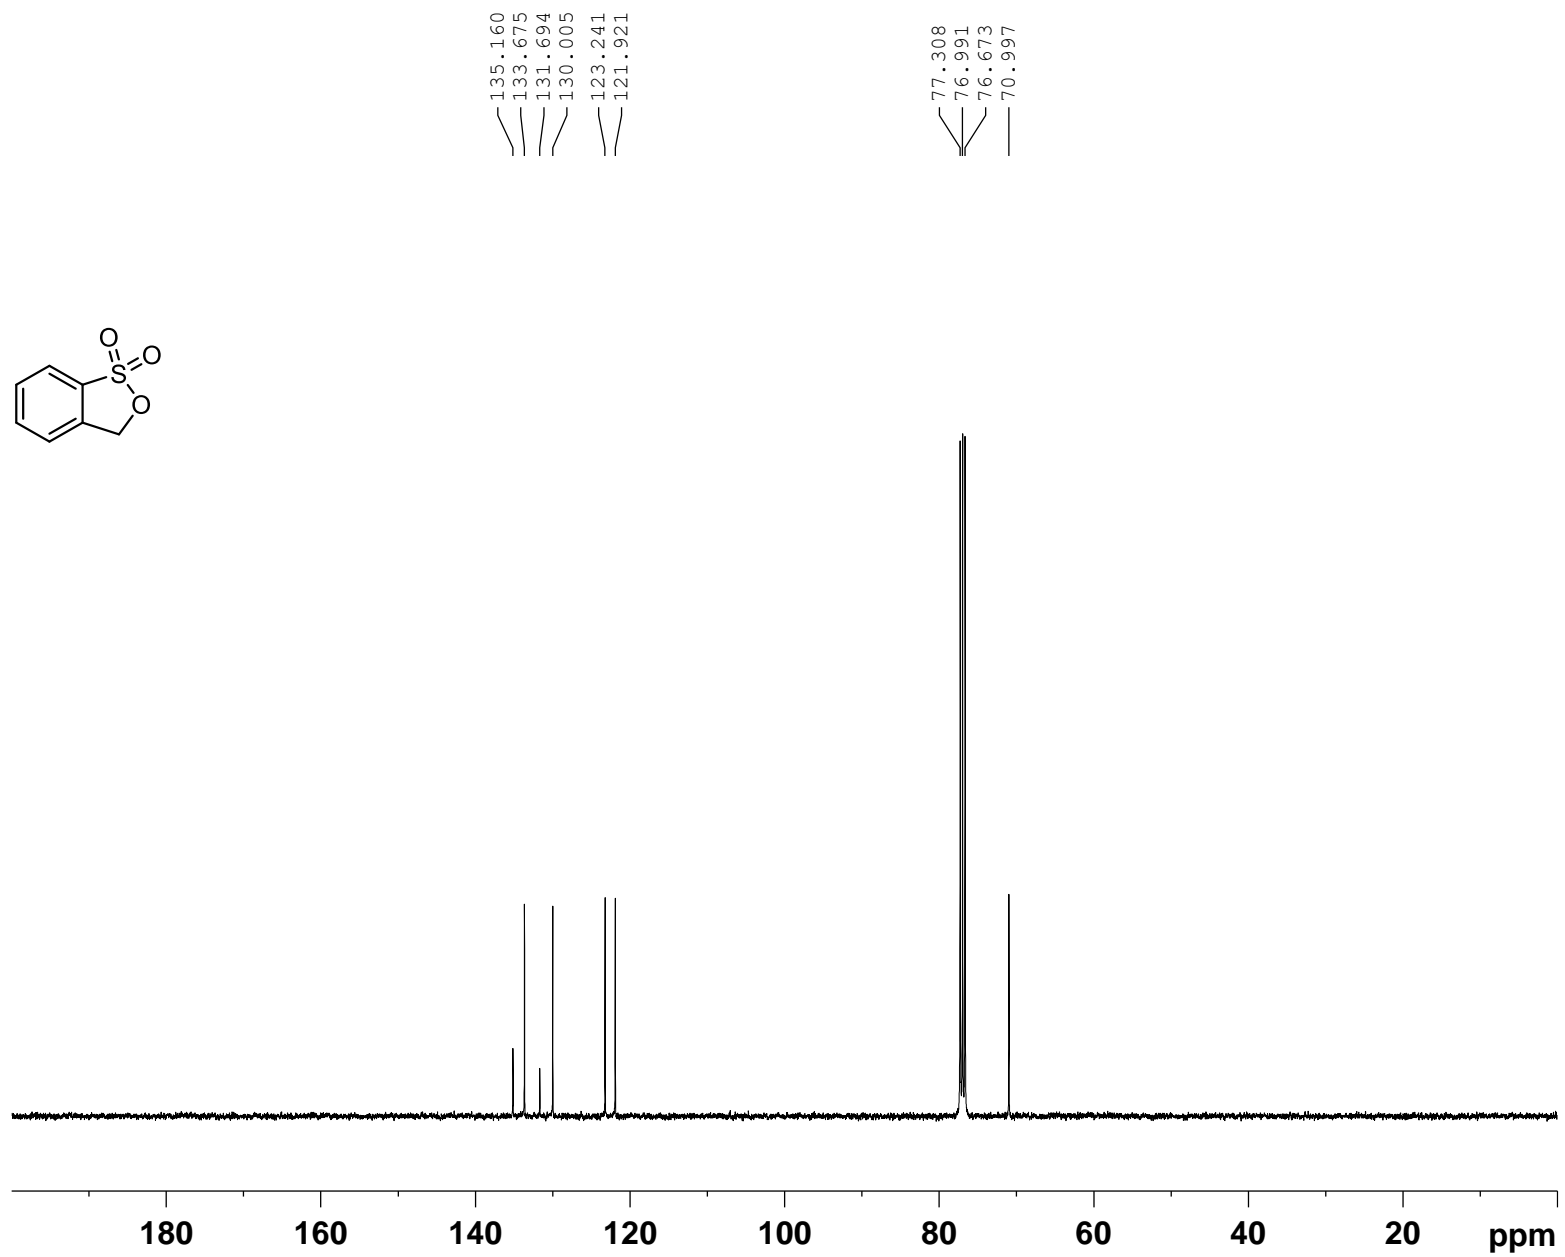

Spectrum

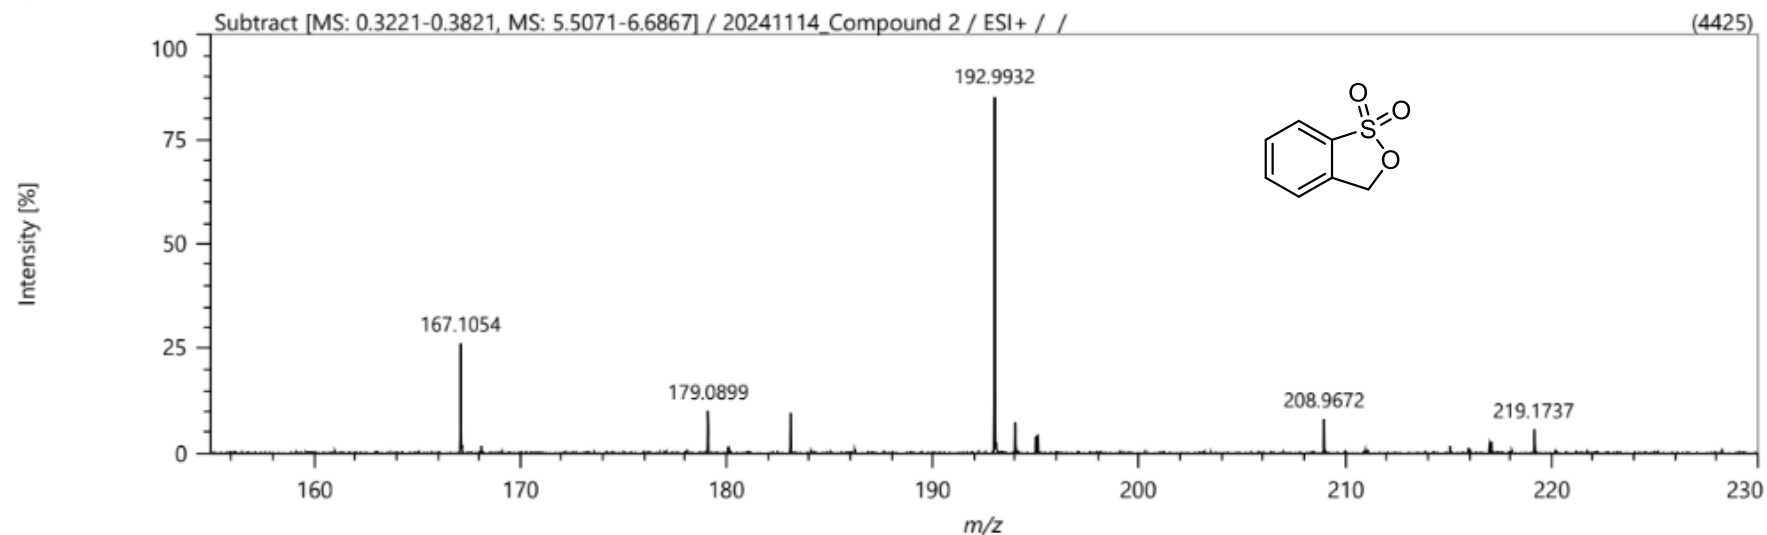

Elemental Composition

Parameters

Tolerance: ±10.00 ppm  
 Electron: Odd/Even  
 Charge: +1  
 DBE: -99.0 - 999.0

Elements Set 2:

| Symbol | C   | H    | O | S | Na |
|--------|-----|------|---|---|----|
| Min    | 0   | 0    | 3 | 1 | 1  |
| Max    | 400 | 1000 | 3 | 1 | 1  |

Results

| Mass      | Formula       | Calculated Mass | Mass Difference [mDa] | Mass Difference [ppm] | DBE |
|-----------|---------------|-----------------|-----------------------|-----------------------|-----|
| 192.99320 | C7 H6 O3 Na S | 192.99299       | 0.22                  | 1.12                  | 4.5 |

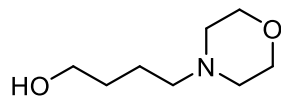

— 7.316

3.747  
3.736  
3.724  
3.591  
3.580  
3.568  
2.511  
2.416  
2.401  
2.389  
1.679  
1.671  
1.666

— -0.001

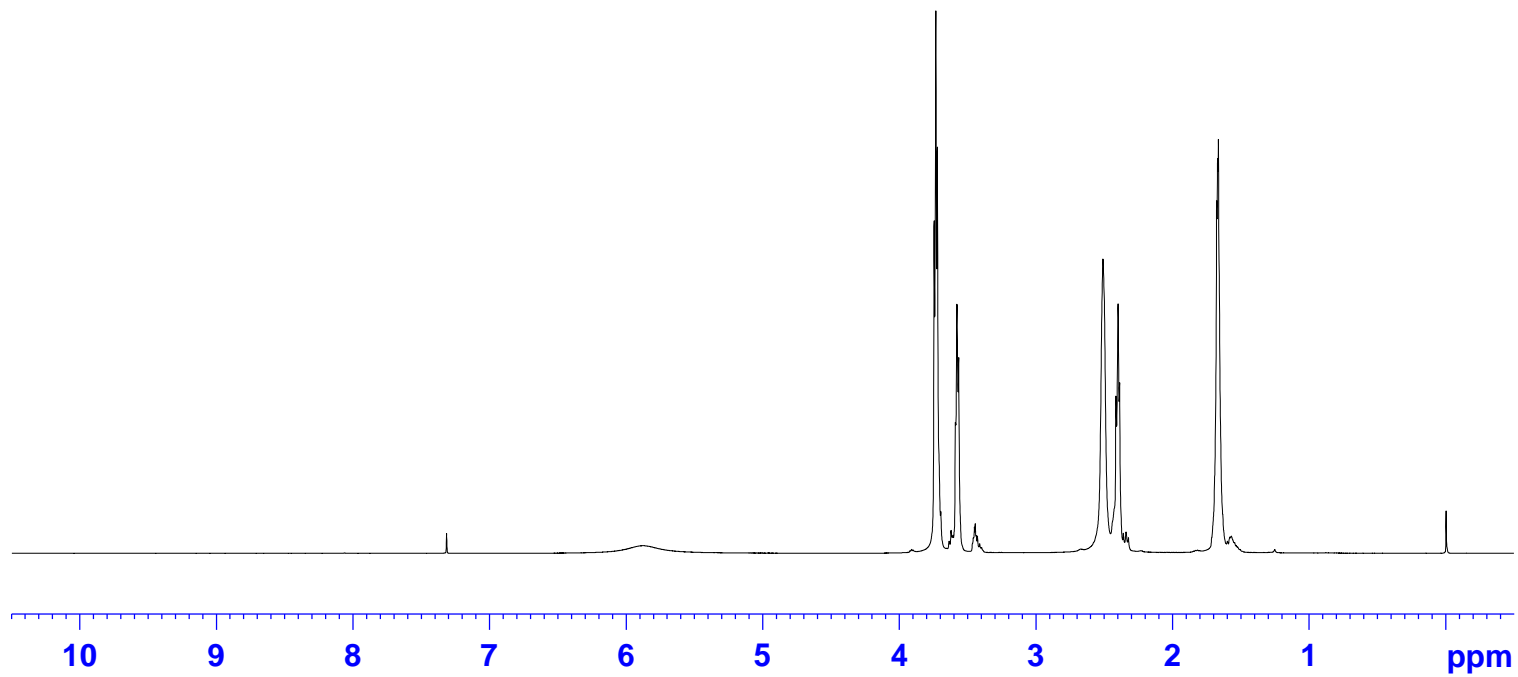



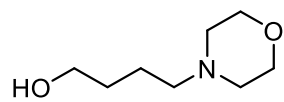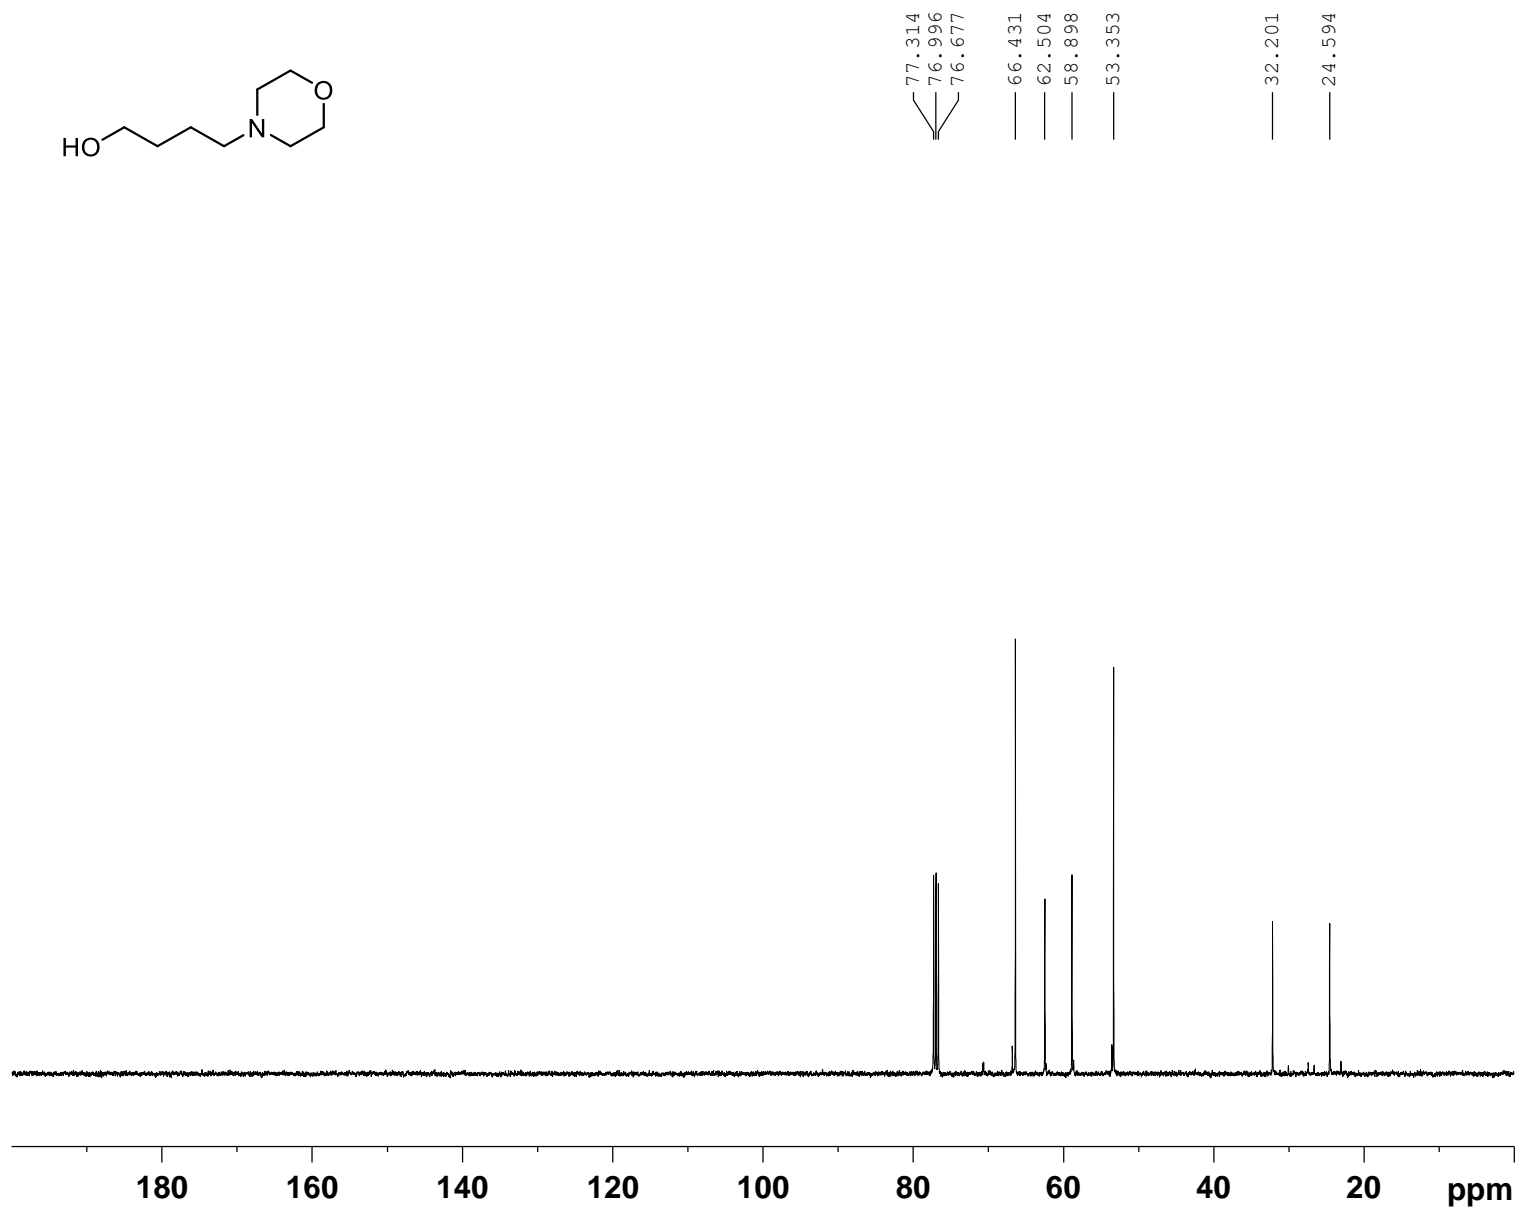

## Spectrum

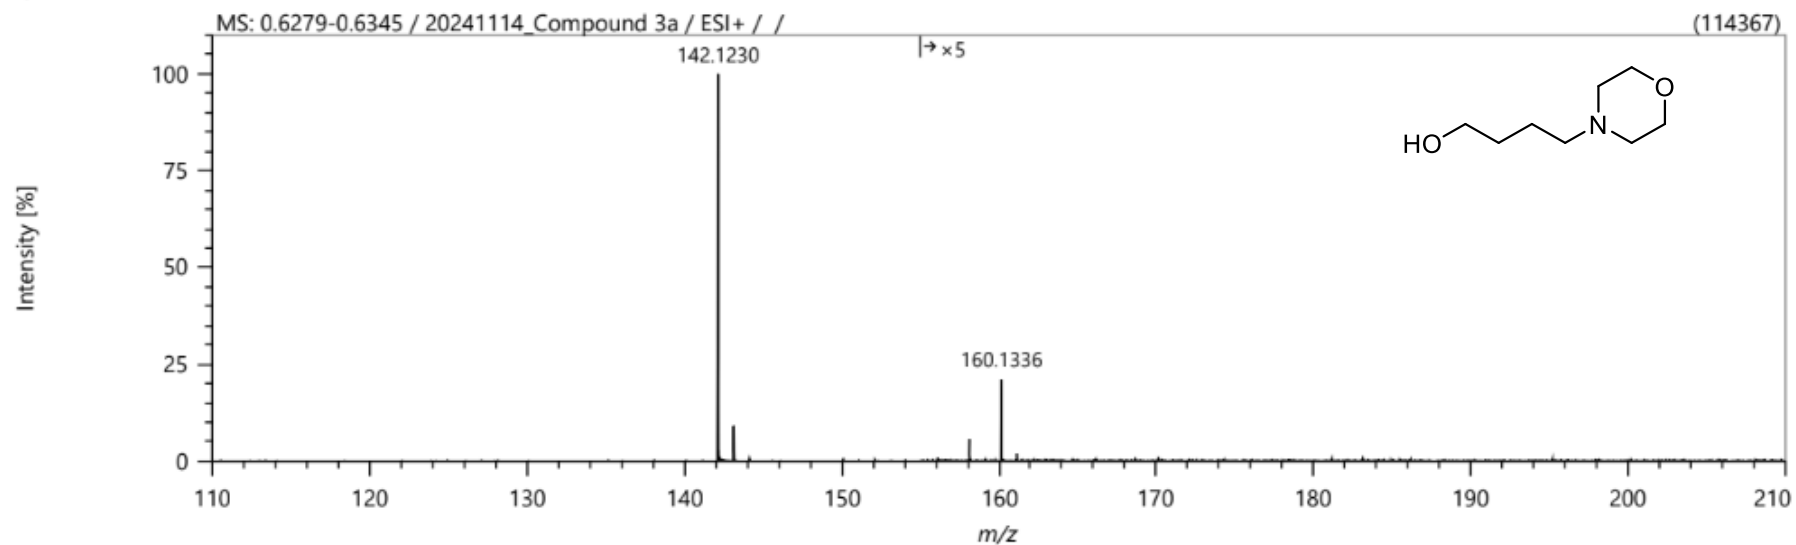

## Elemental Composition

## Parameters

Tolerance: ±10.00 ppm  
 Electron: Odd/Even  
 Charge: +1  
 DBE: -99.0 - 999.0

## Elements Set 2:

| Symbol | C   | H    | O | N | Na |
|--------|-----|------|---|---|----|
| Min    | 0   | 0    | 2 | 1 | 0  |
| Max    | 400 | 1000 | 2 | 1 | 1  |

## Results

| Mass      | Formula                                         | Calculated Mass | Mass Difference [mDa] | Mass Difference [ppm] | DBE |
|-----------|-------------------------------------------------|-----------------|-----------------------|-----------------------|-----|
| 160.13358 | C <sub>8</sub> H <sub>18</sub> N O <sub>2</sub> | 160.13321       | 0.37                  | 2.34                  | 0.5 |

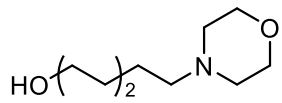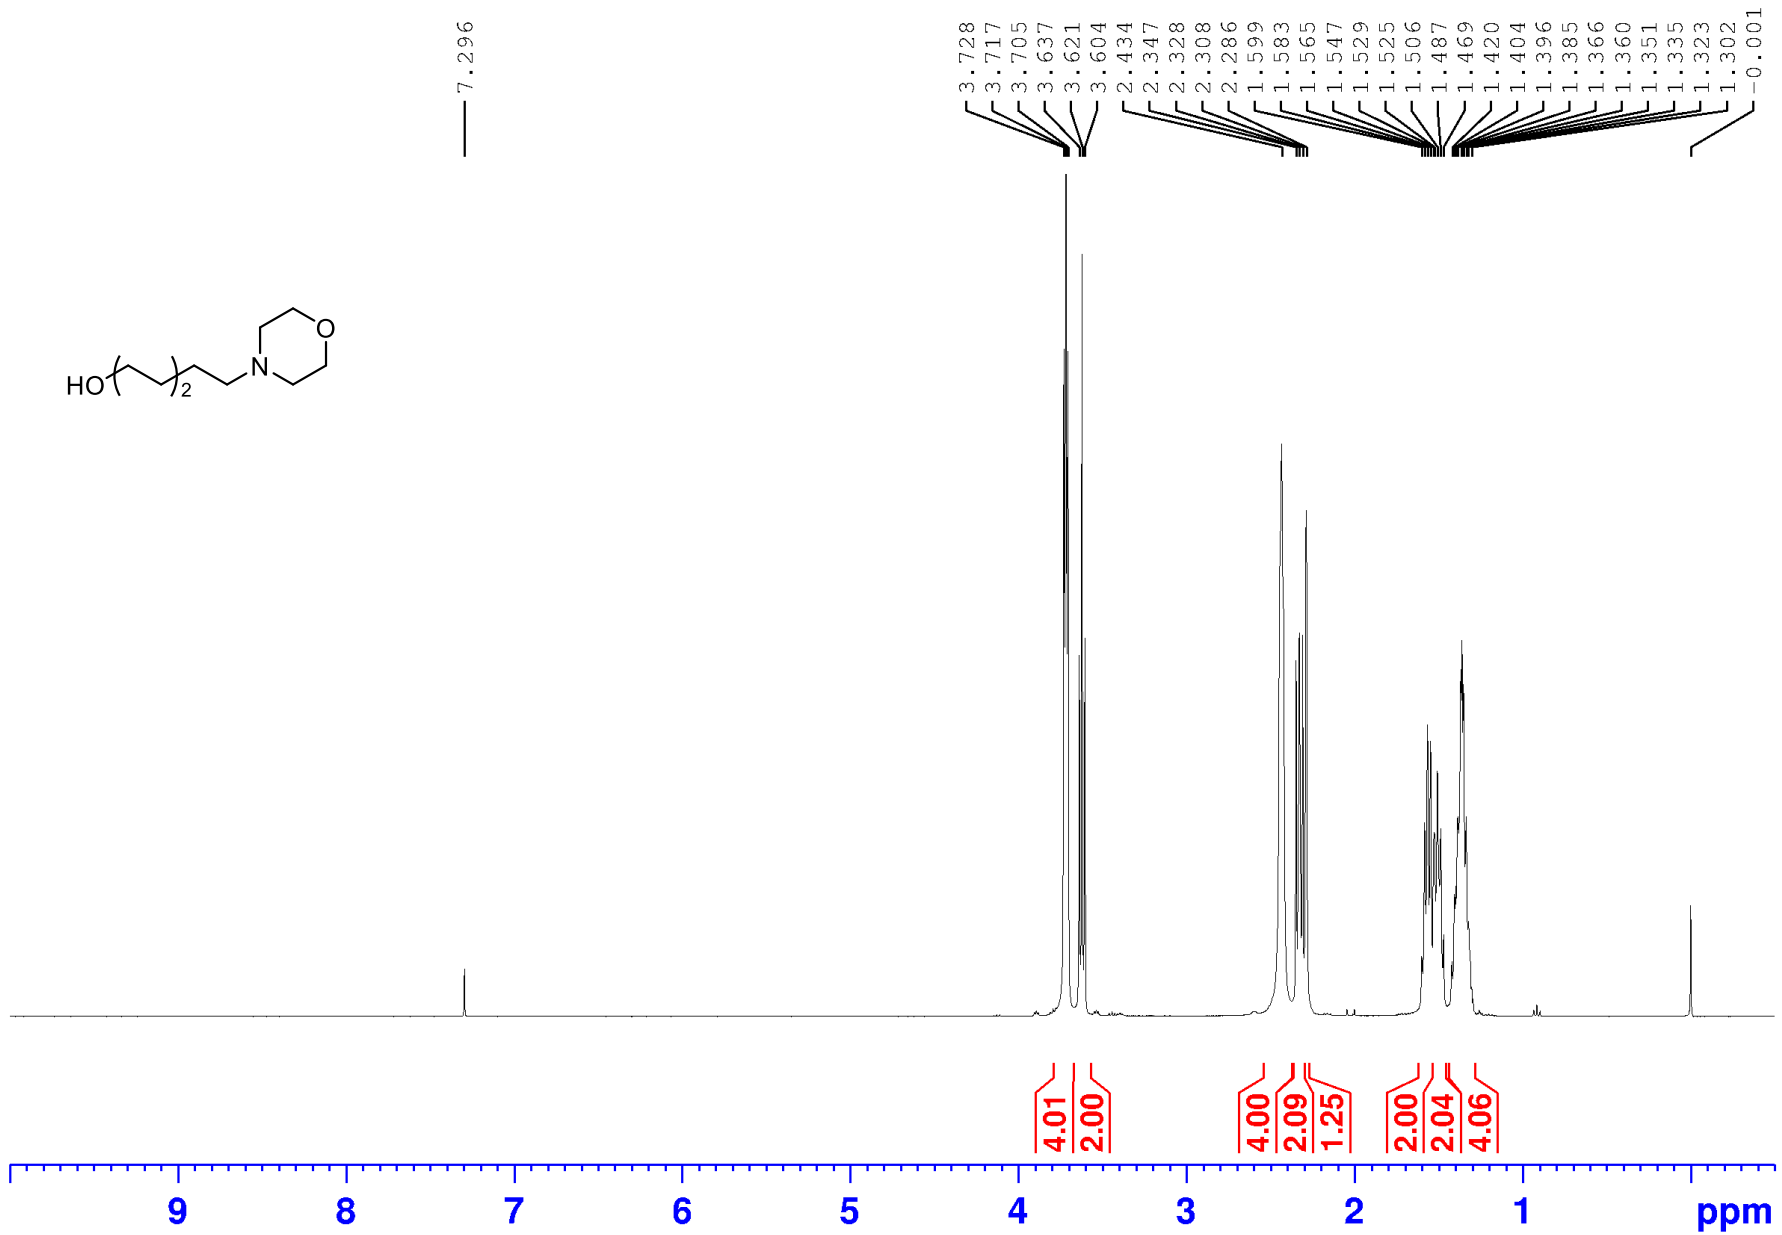

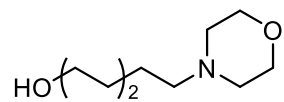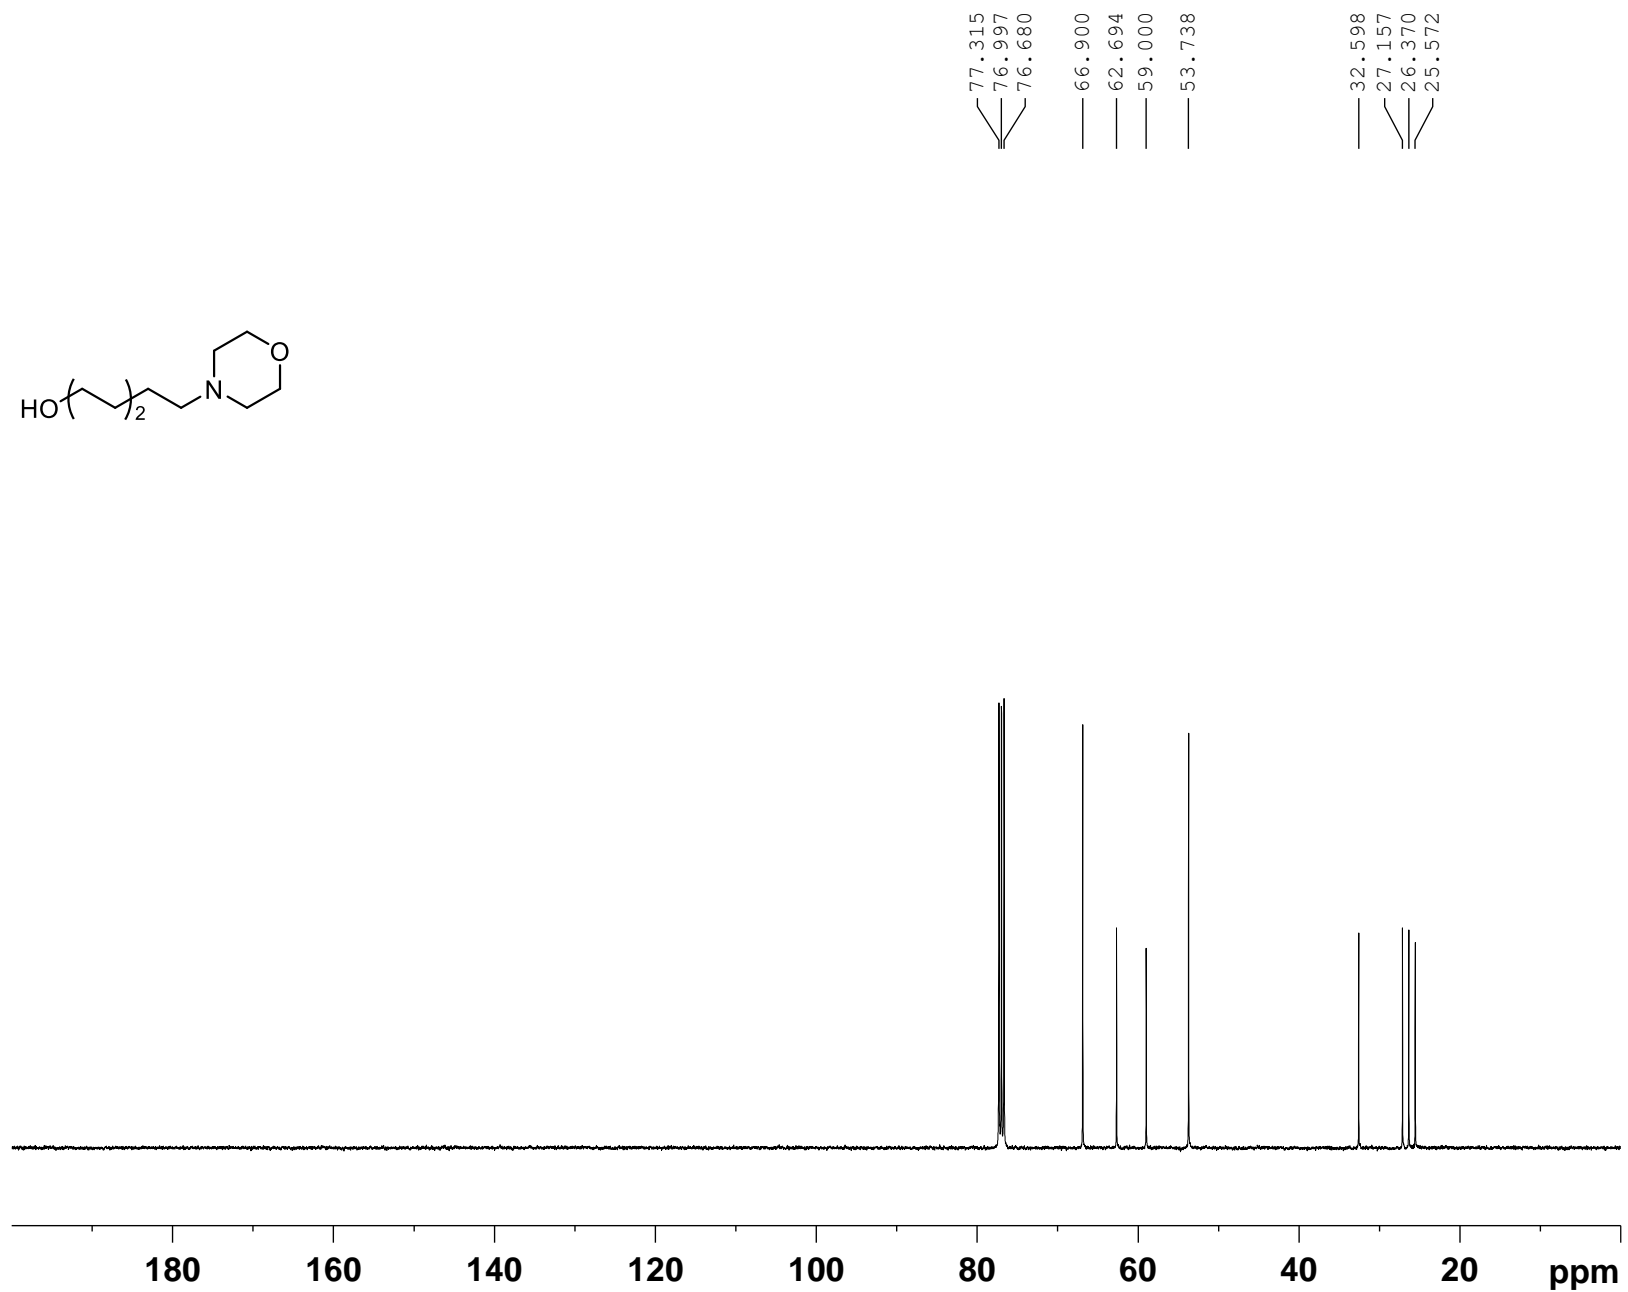

Spectrum

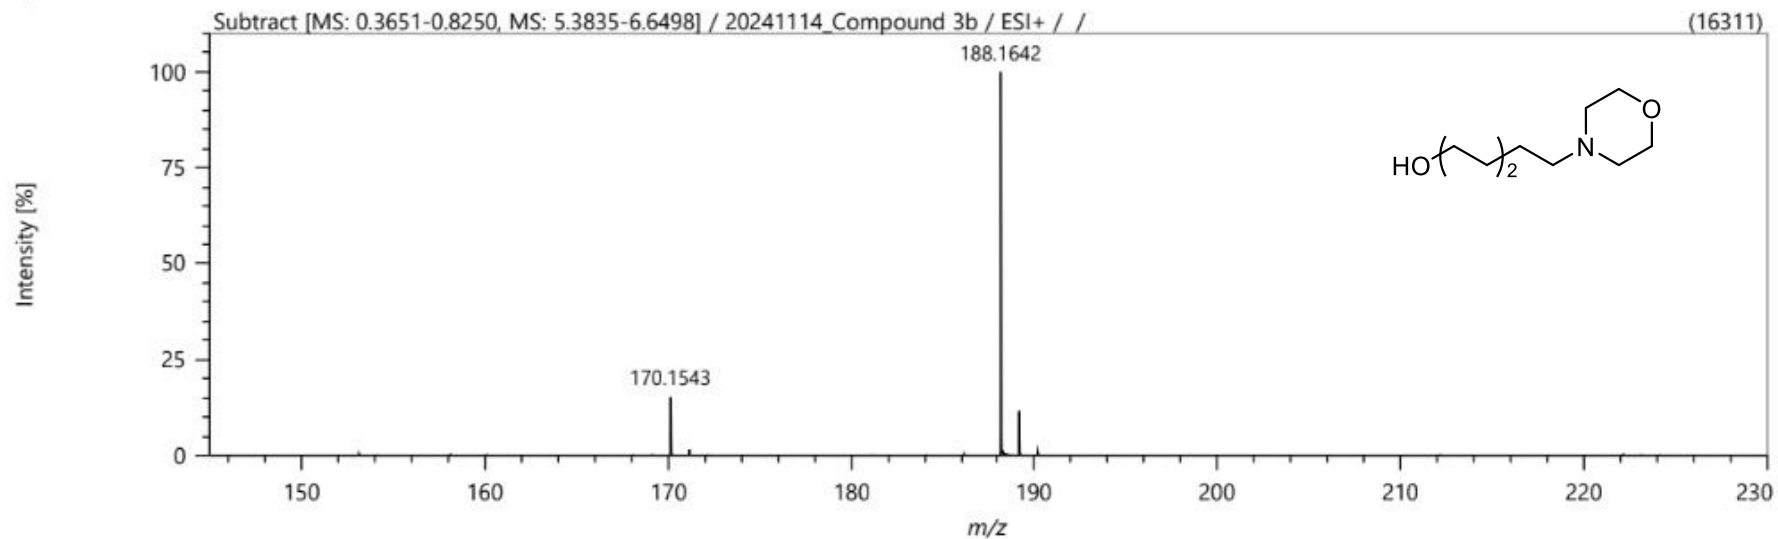

Elemental Composition

Parameters

Tolerance: ±10.00 ppm  
 Electron: Odd/Even  
 Charge: +1  
 DBE: -99.0 - 999.0

Elements Set 2:

| Symbol | C   | H    | O | N | Na |
|--------|-----|------|---|---|----|
| Min    | 0   | 0    | 2 | 1 | 0  |
| Max    | 400 | 1000 | 2 | 1 | 1  |

Results

| Mass      | Formula      | Calculated Mass | Mass Difference [mDa] | Mass Difference [ppm] | DBE |
|-----------|--------------|-----------------|-----------------------|-----------------------|-----|
| 188.16419 | C10 H22 N O2 | 188.16451       | -0.31                 | -1.65                 | 0.5 |

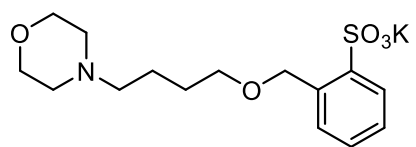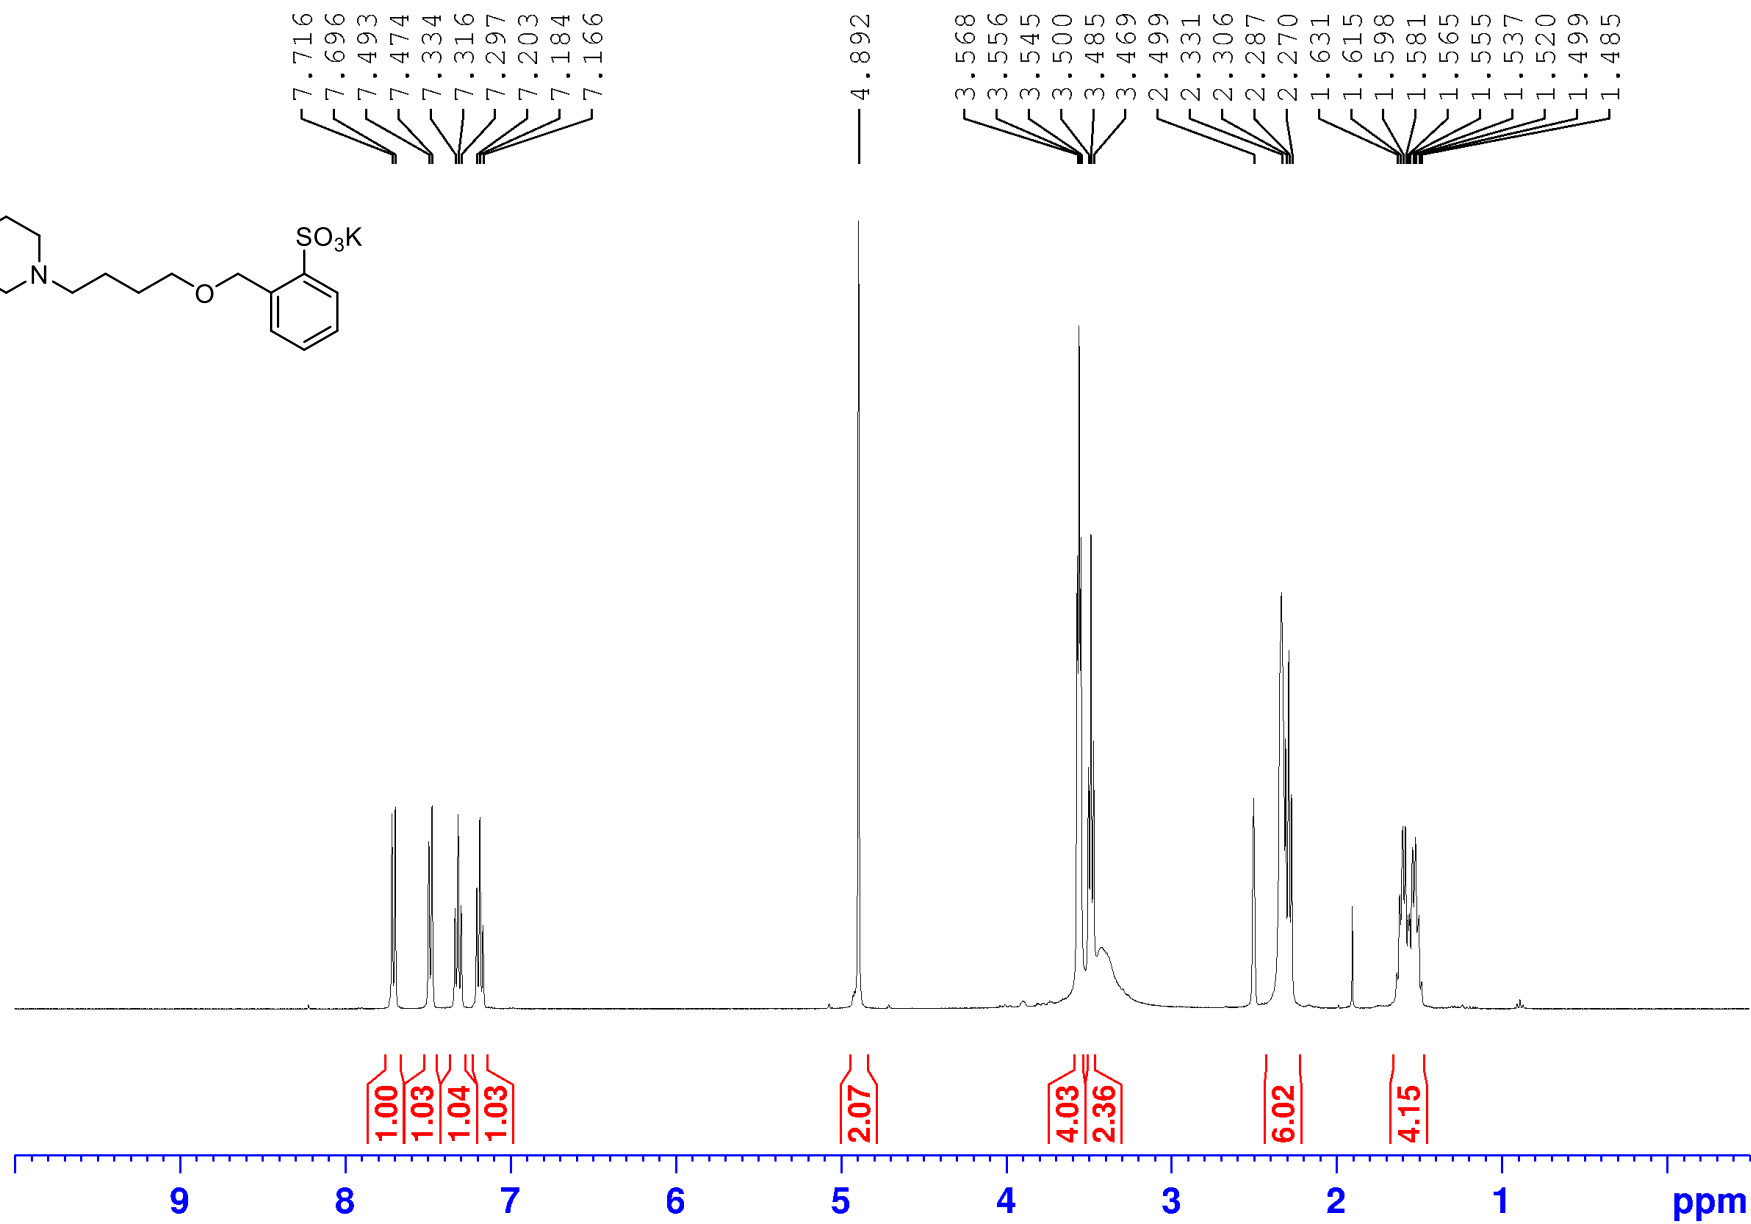

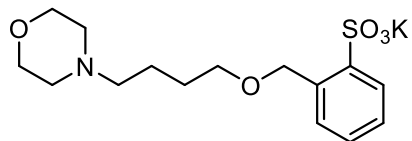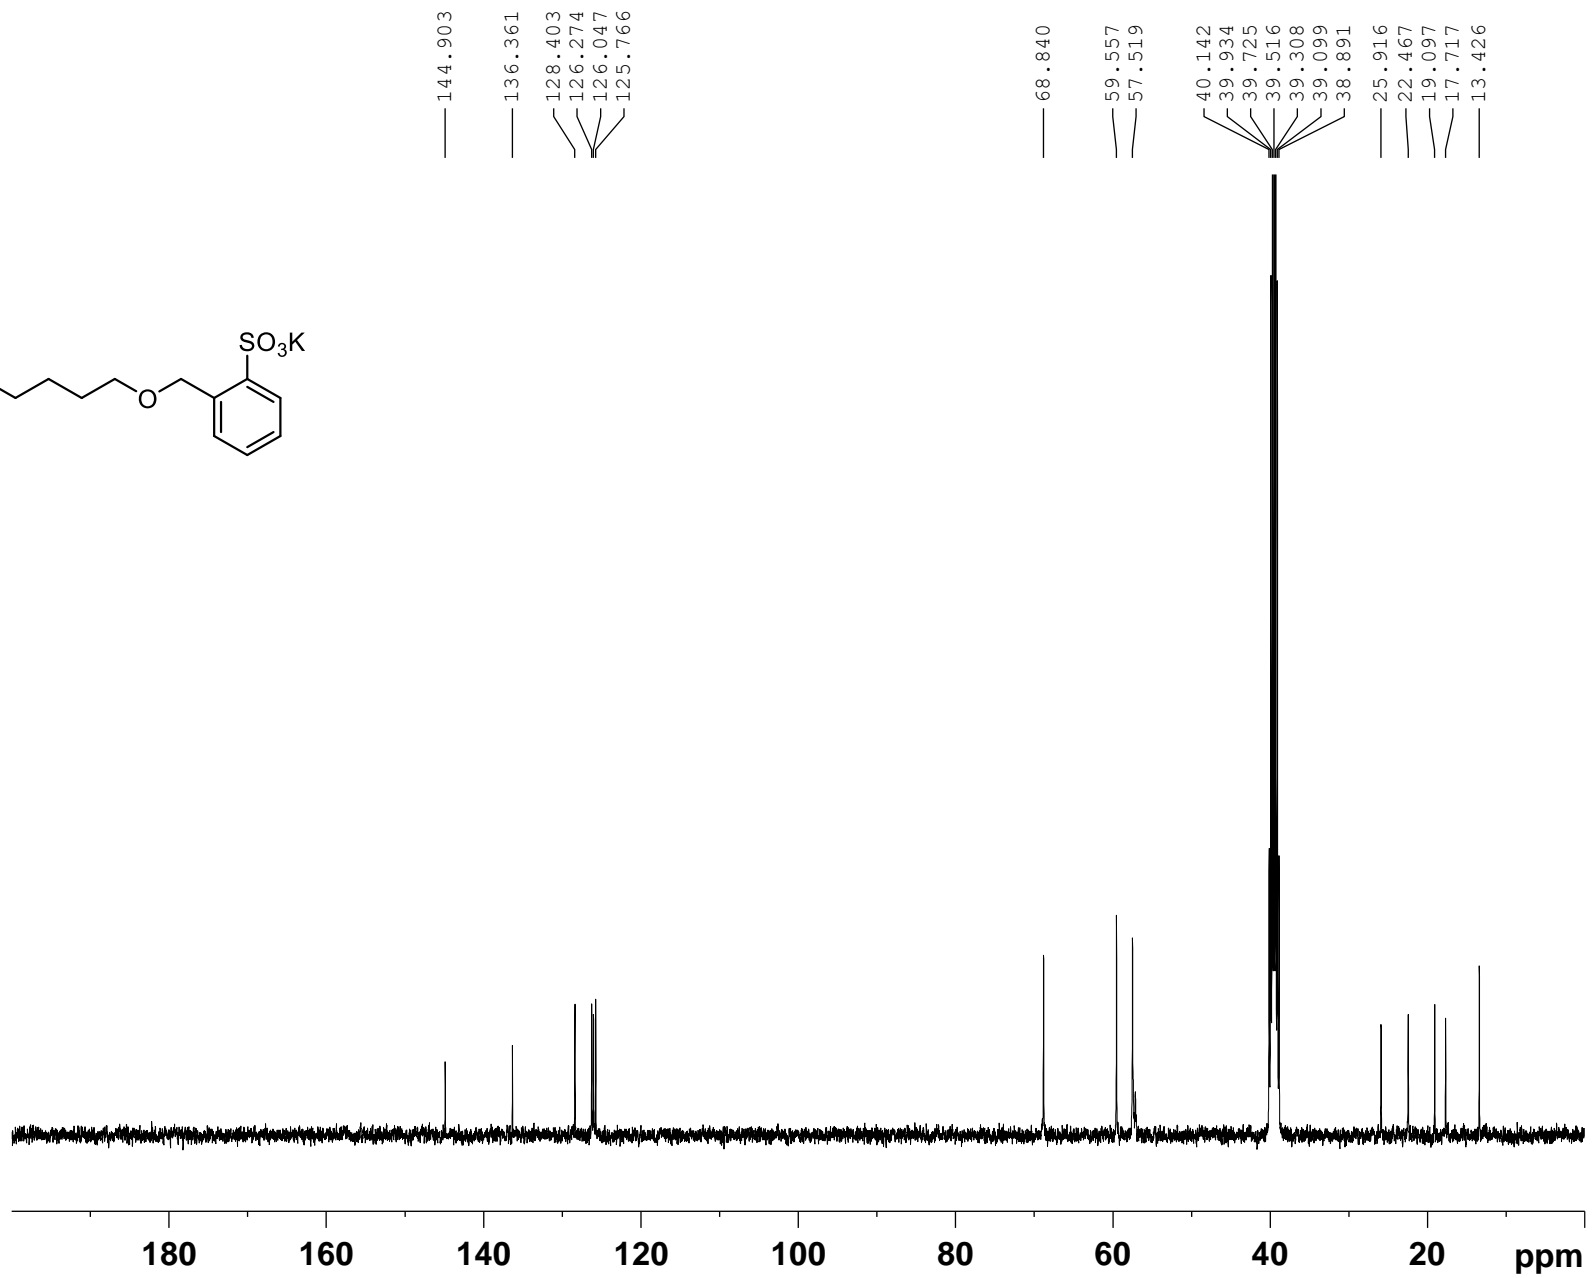

## Spectrum

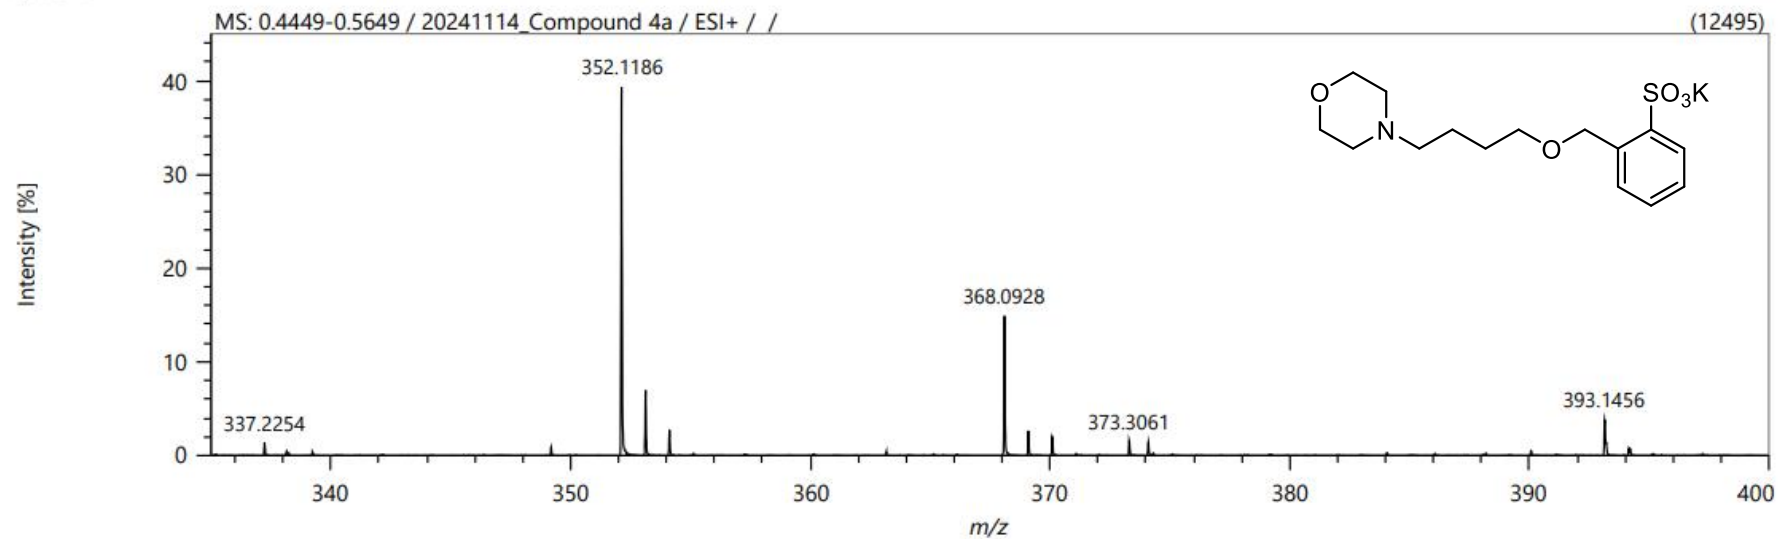

## Elemental Composition

## Parameters

Tolerance: ±10.00 ppm  
 Electron: Odd/Even  
 Charge: +1  
 DBE: -99.0 - 999.0

## Elements Set 2:

| Symbol | C   | H    | O | N | S | K |
|--------|-----|------|---|---|---|---|
| Min    | 0   | 0    | 5 | 1 | 1 | 1 |
| Max    | 400 | 1000 | 5 | 1 | 1 | 1 |

## Results

| Mass      | Formula                                              | Calculated Mass | Mass Difference [mDa] | Mass Difference [ppm] | DBE |
|-----------|------------------------------------------------------|-----------------|-----------------------|-----------------------|-----|
| 368.09278 | C <sub>15</sub> H <sub>23</sub> N O <sub>5</sub> S K | 368.09285       | -0.07                 | -0.19                 | 4.5 |



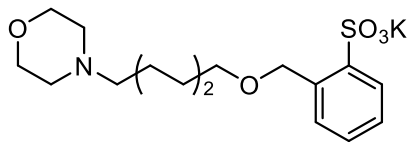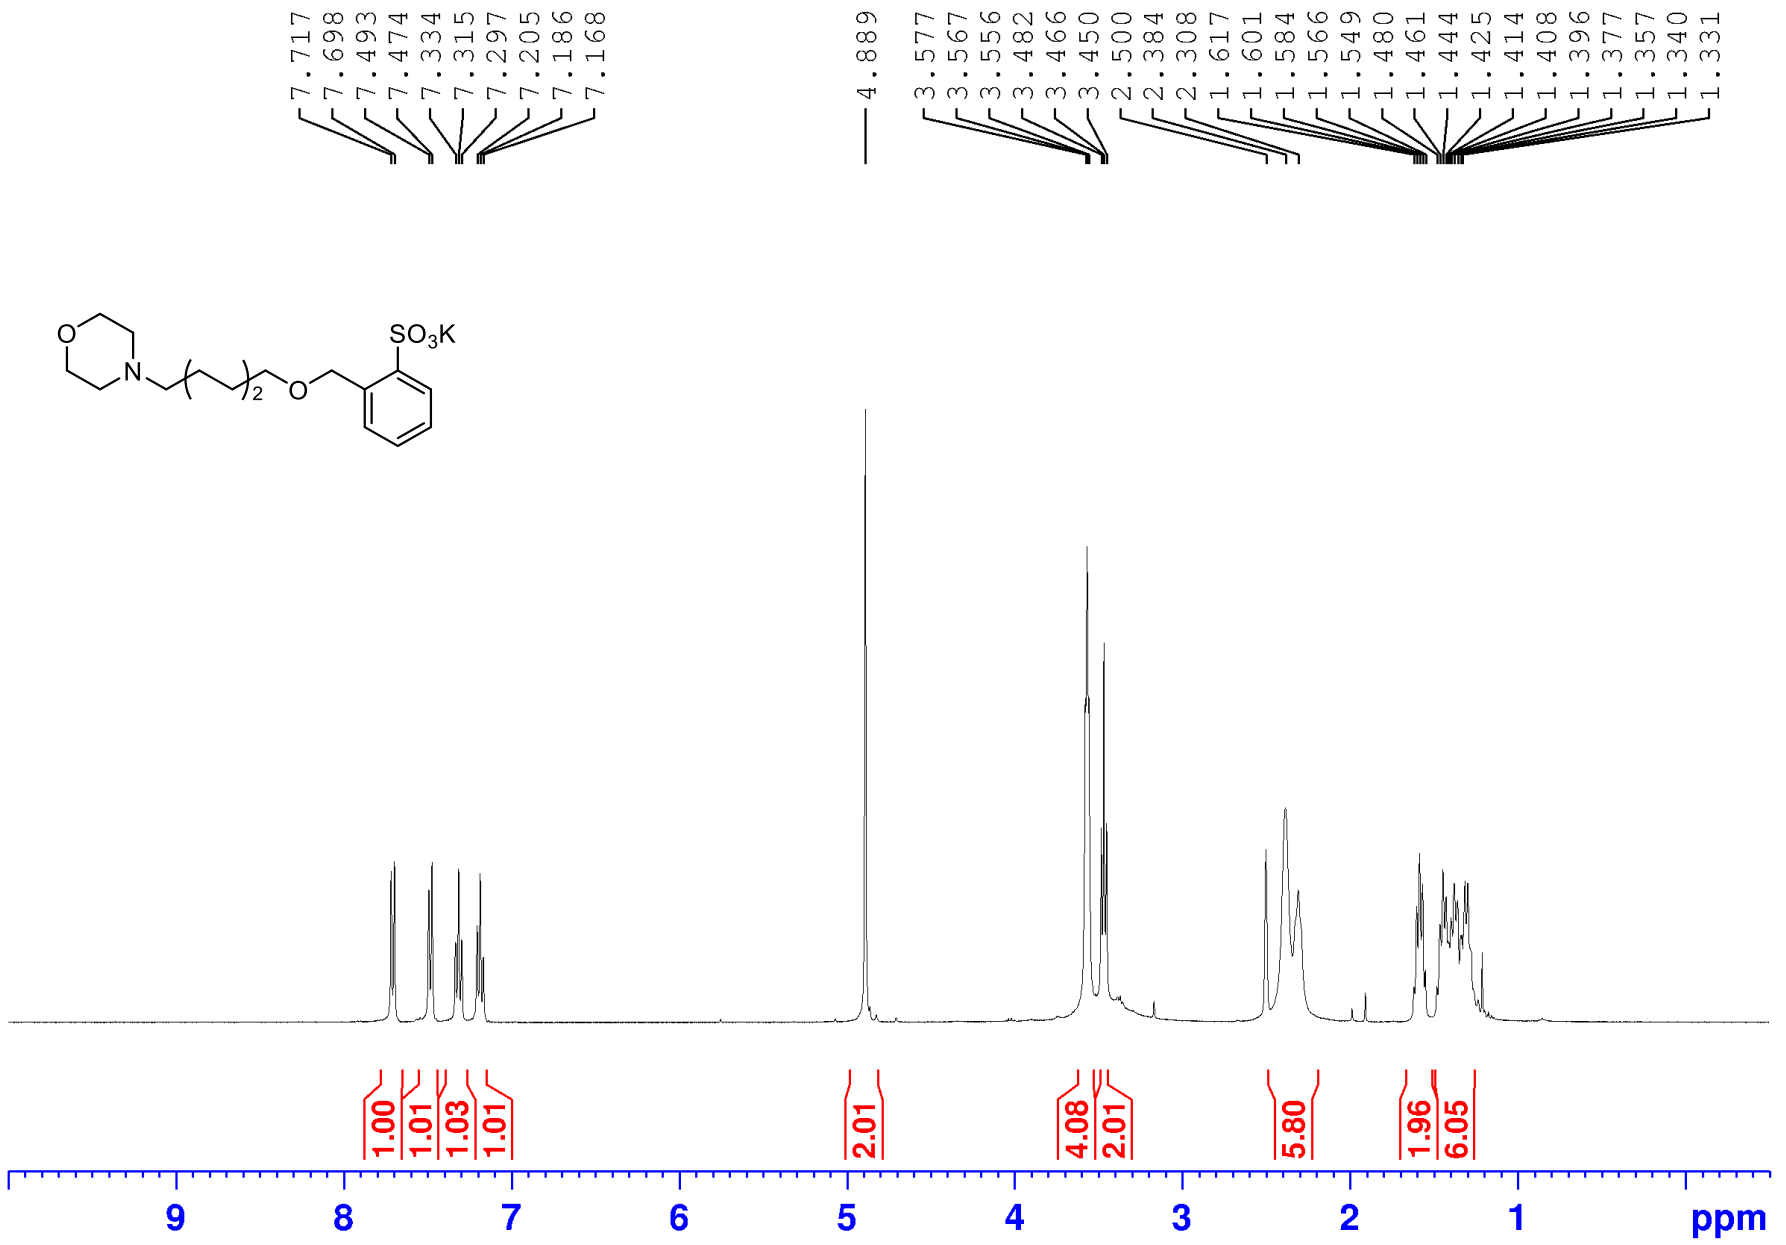

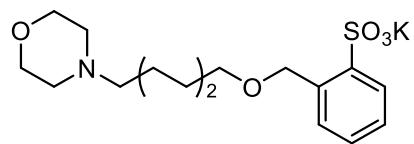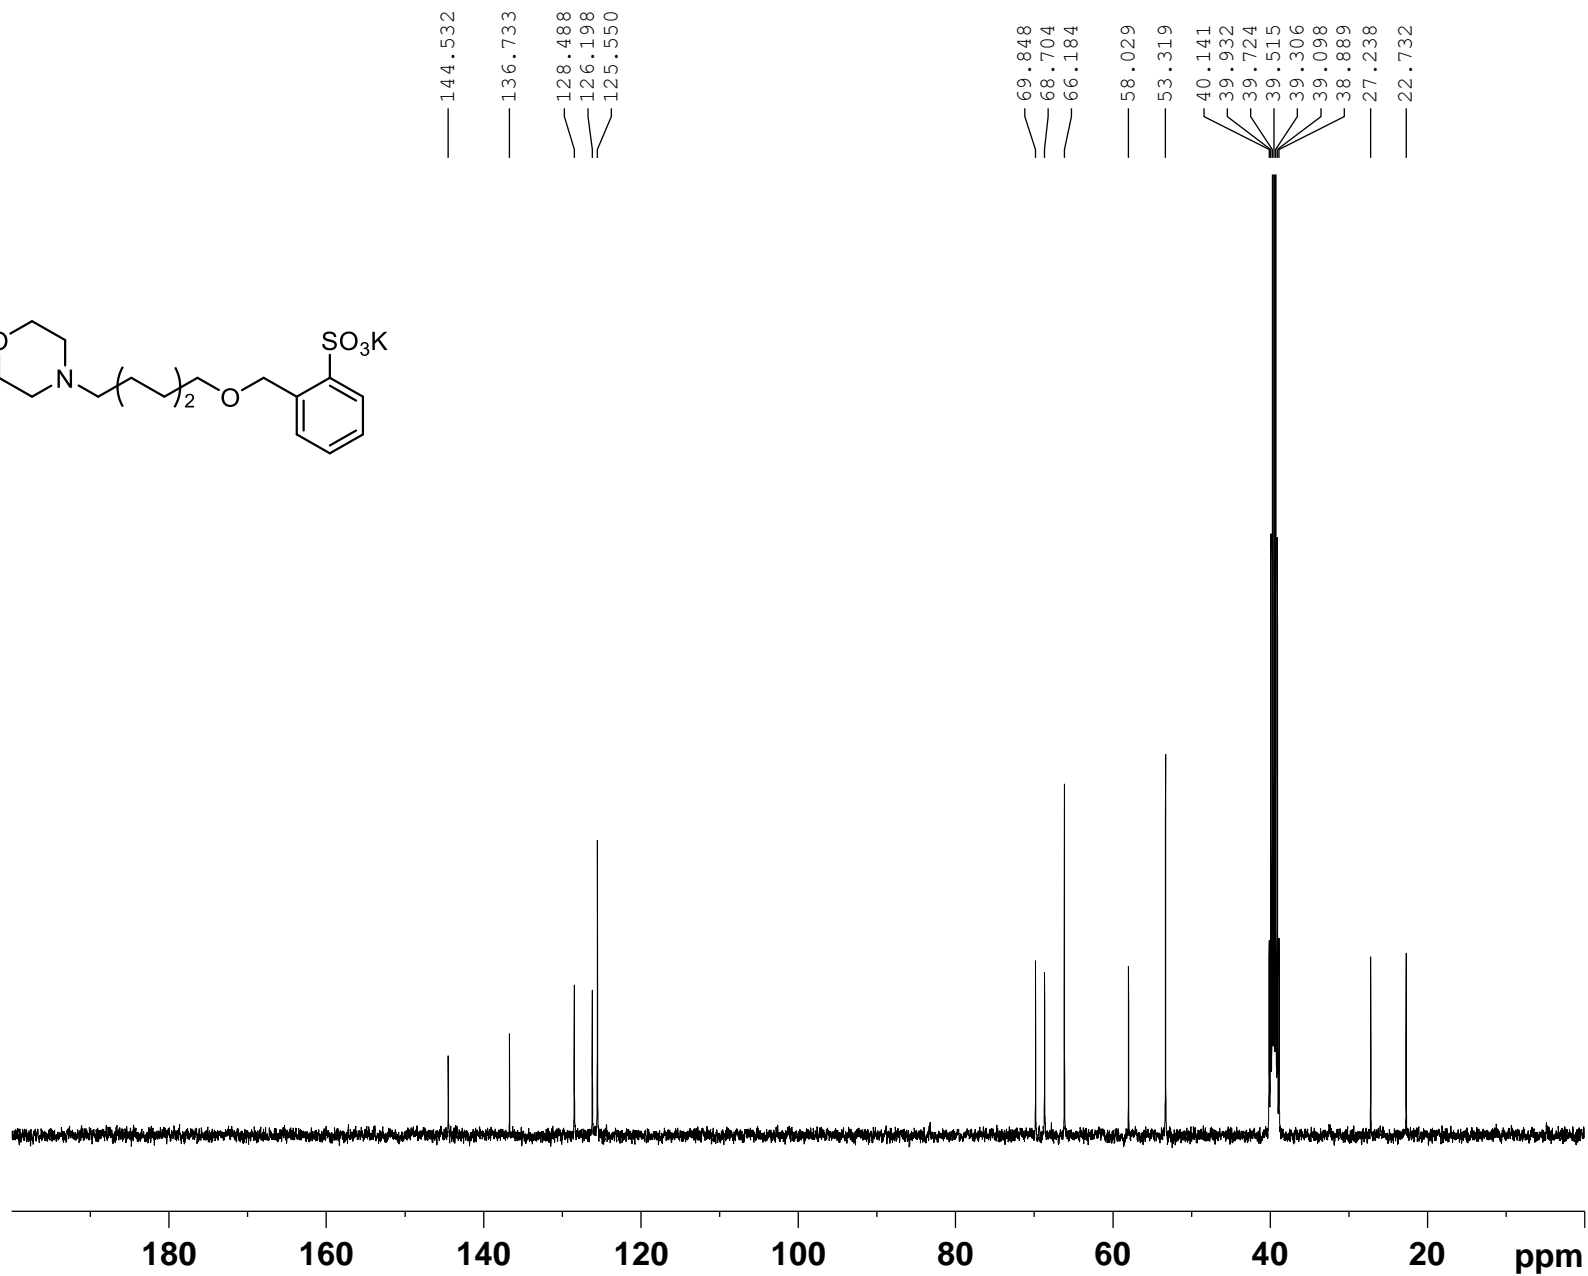

Spectrum

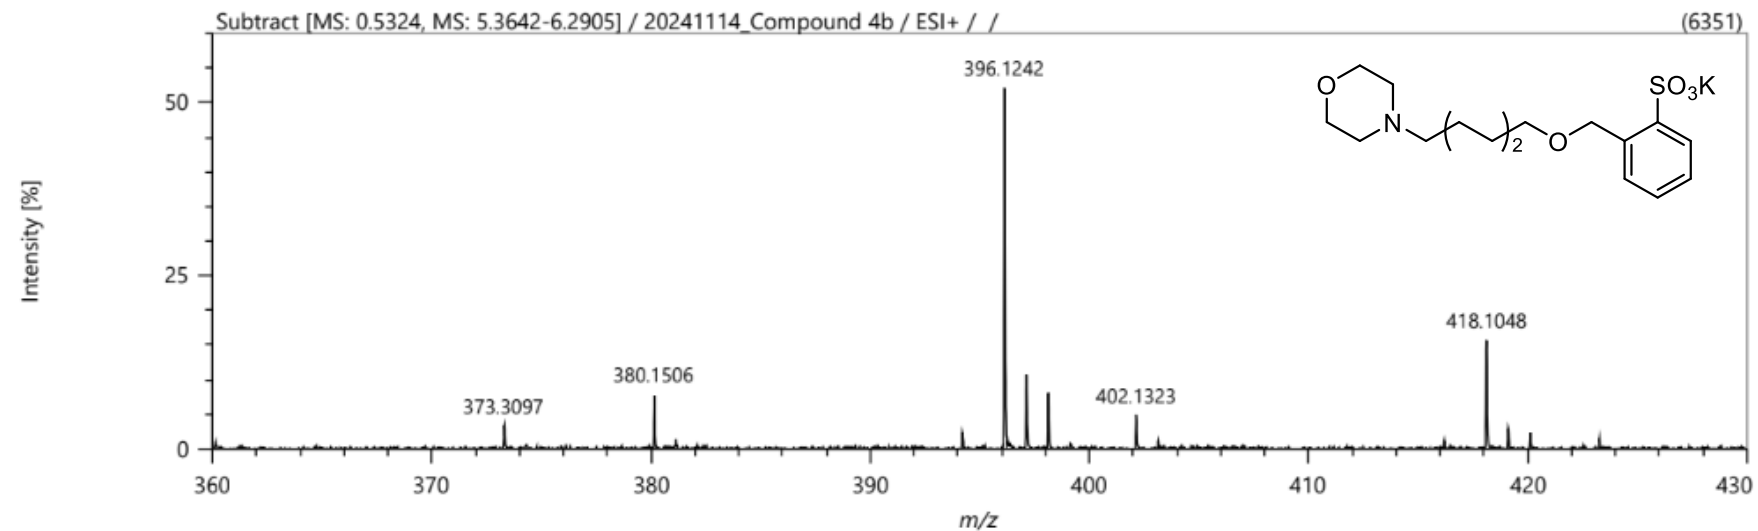

Elemental Composition

Parameters

Tolerance: ±10.00 ppm  
 Electron: Odd/Even  
 Charge: +1  
 DBE: -99.0 - 999.0

Elements Set 2:

| Symbol | C   | H    | O | N | S | K |
|--------|-----|------|---|---|---|---|
| Min    | 0   | 0    | 5 | 1 | 1 | 1 |
| Max    | 400 | 1000 | 5 | 1 | 1 | 1 |

Results

| Mass      | Formula                                                                        | Calculated Mass | Mass Difference [mDa] | Mass Difference [ppm] | DBE |
|-----------|--------------------------------------------------------------------------------|-----------------|-----------------------|-----------------------|-----|
| 396.12418 | C <sub>17</sub> H <sub>27</sub> N <sub>1</sub> O <sub>5</sub> S <sub>1</sub> K | 396.12415       | 0.02                  | 0.06                  | 4.5 |

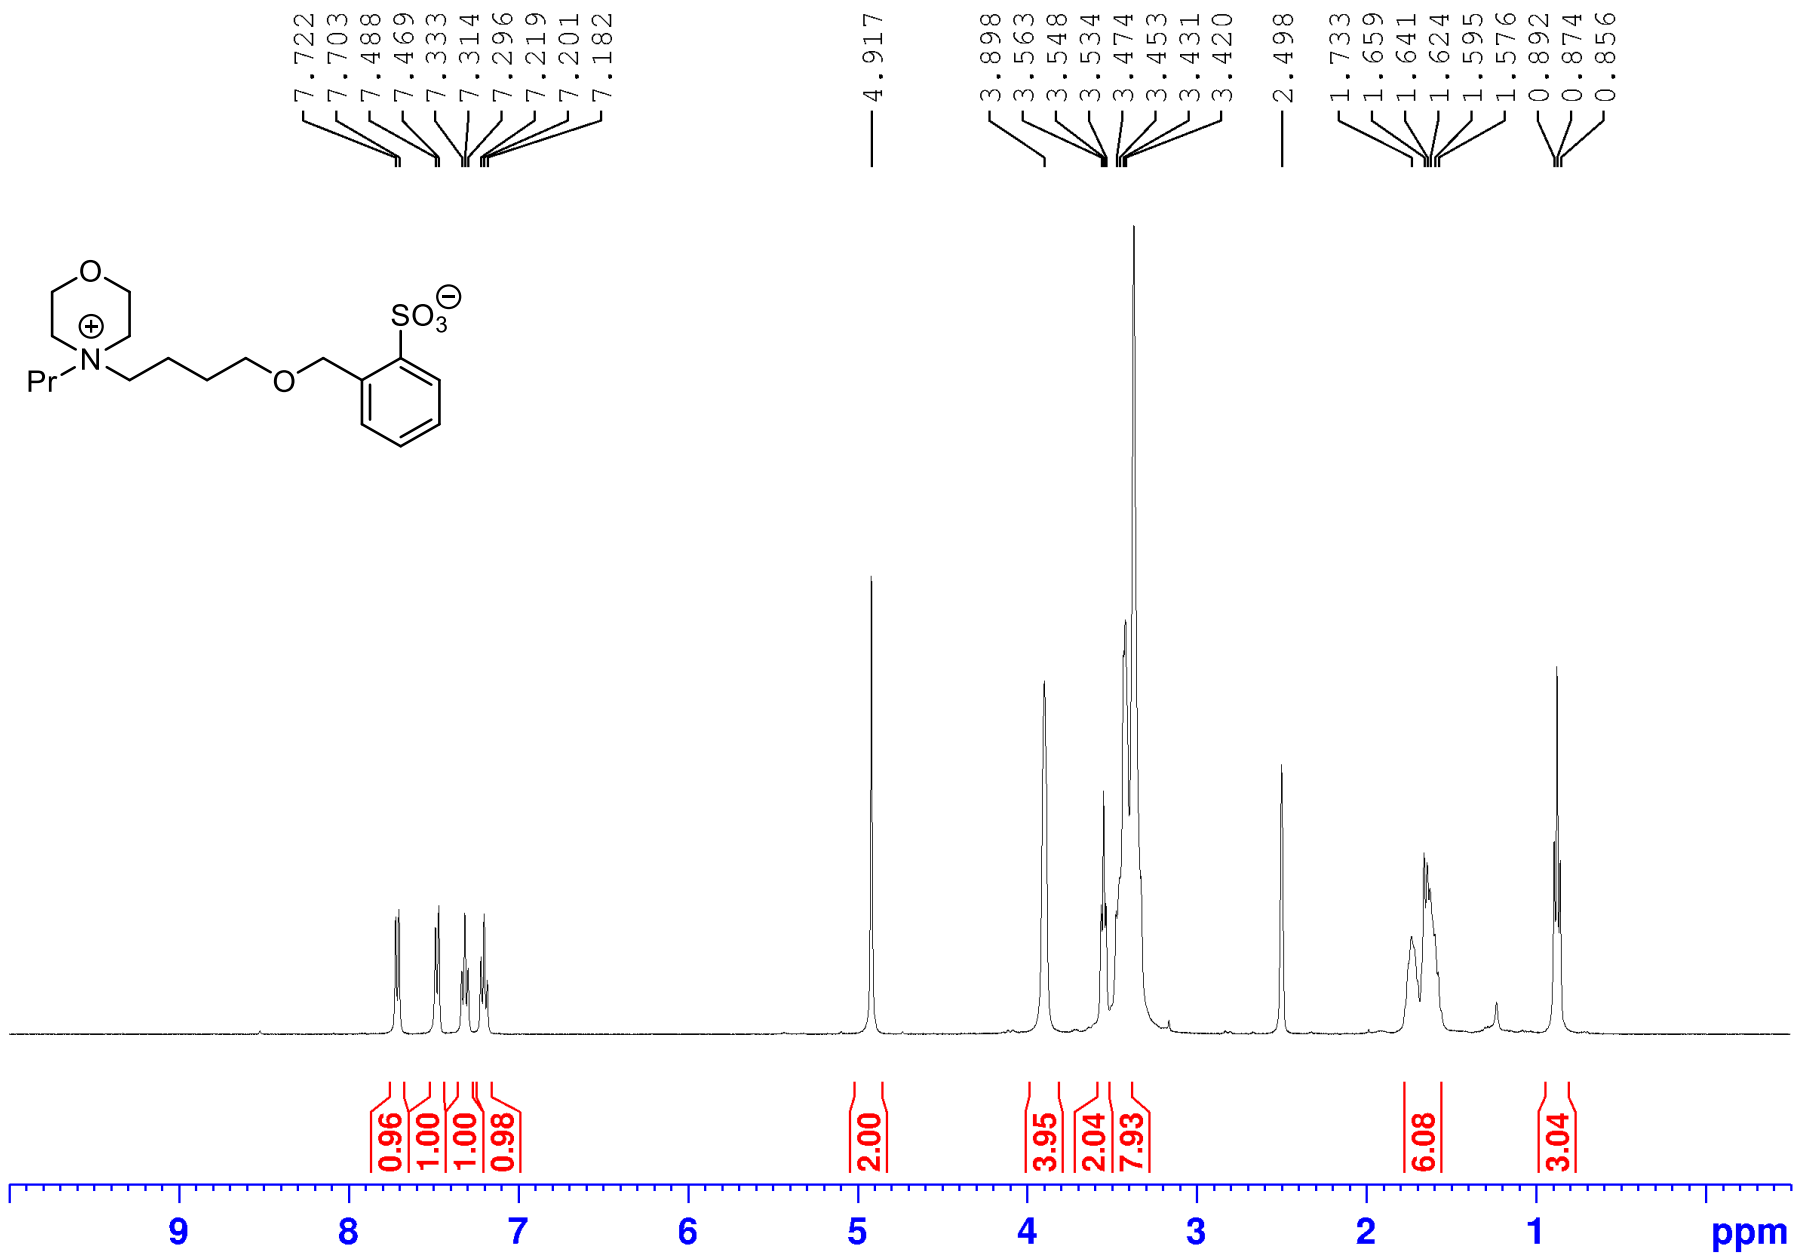

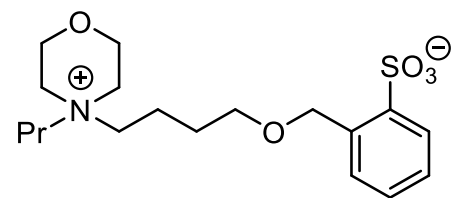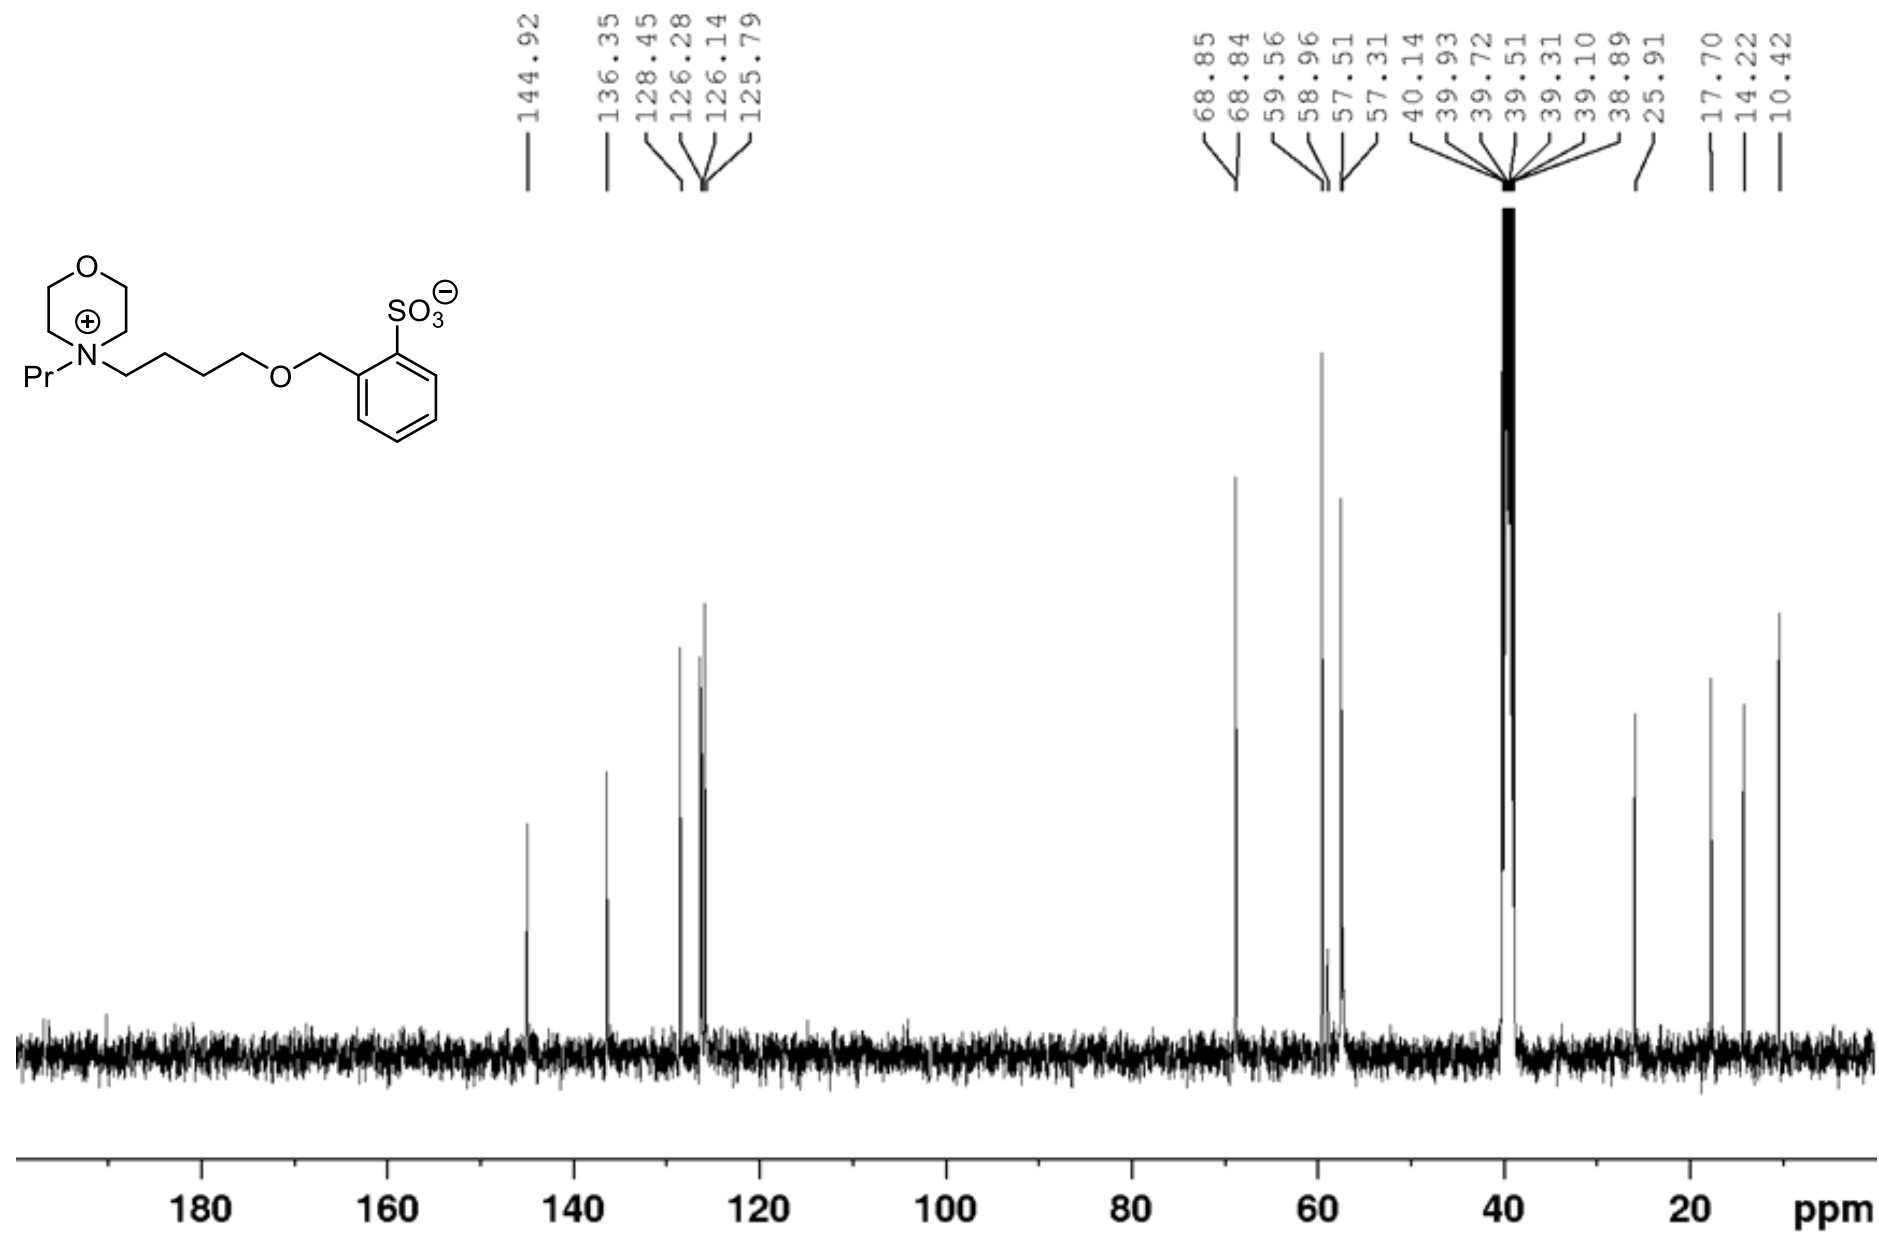

Spectrum

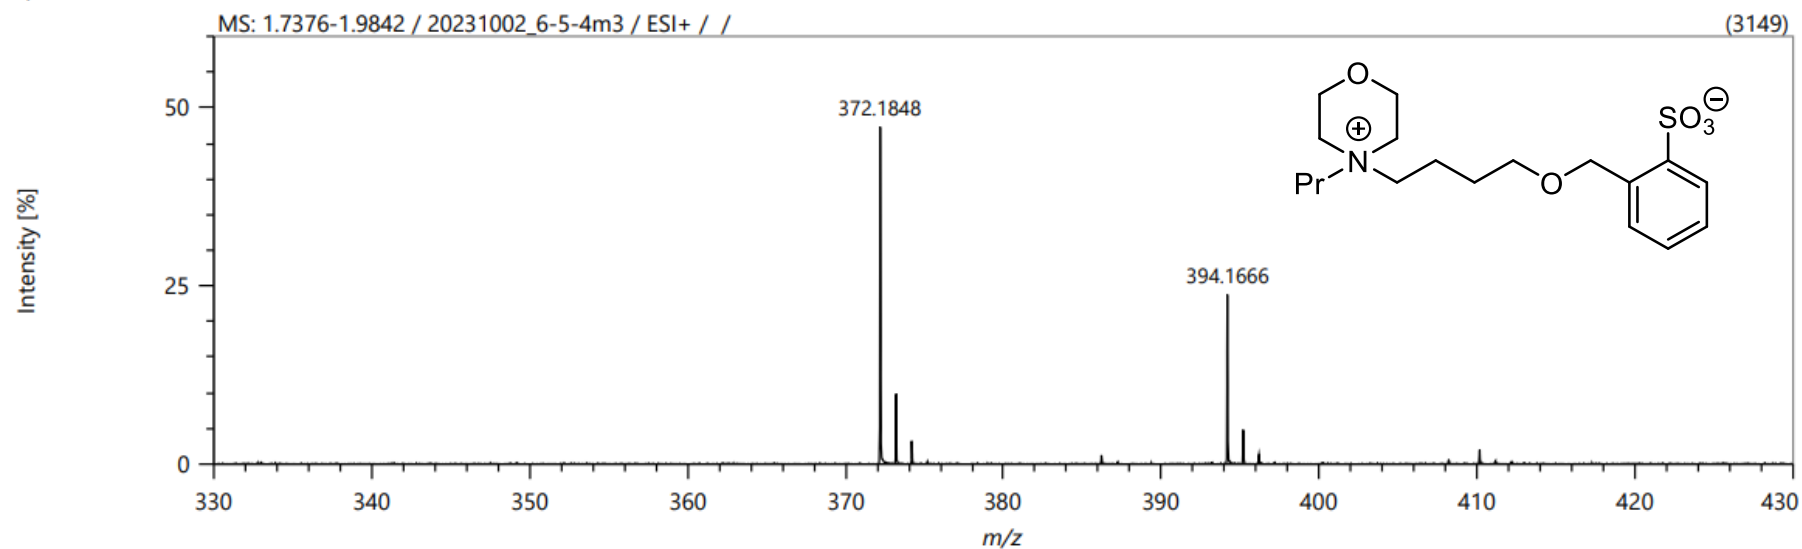

Elemental Composition

Parameters

Tolerance: ±3.00 ppm  
 Electron: Odd/Even  
 Charge: +1  
 DBE: -99.0 - 999.0

Elements Set 2:

| Symbol | C   | H    | N | O | S | Na |
|--------|-----|------|---|---|---|----|
| Min    | 0   | 0    | 1 | 5 | 1 | 0  |
| Max    | 400 | 1000 | 1 | 5 | 1 | 1  |

Results

| Mass      | Formula                                               | Calculated Mass | Mass Difference [mDa] | Mass Difference [ppm] | DBE |
|-----------|-------------------------------------------------------|-----------------|-----------------------|-----------------------|-----|
| 372.18476 | C <sub>18</sub> H <sub>30</sub> N O <sub>5</sub> S    | 372.18392       | 0.84                  | 2.27                  | 4.5 |
| 394.16658 | C <sub>18</sub> H <sub>29</sub> N O <sub>5</sub> Na S | 394.16586       | 0.71                  | 1.81                  | 4.5 |

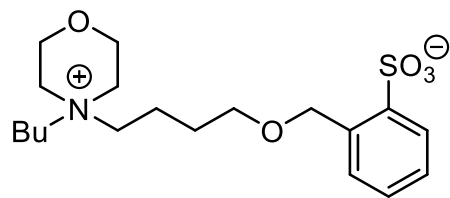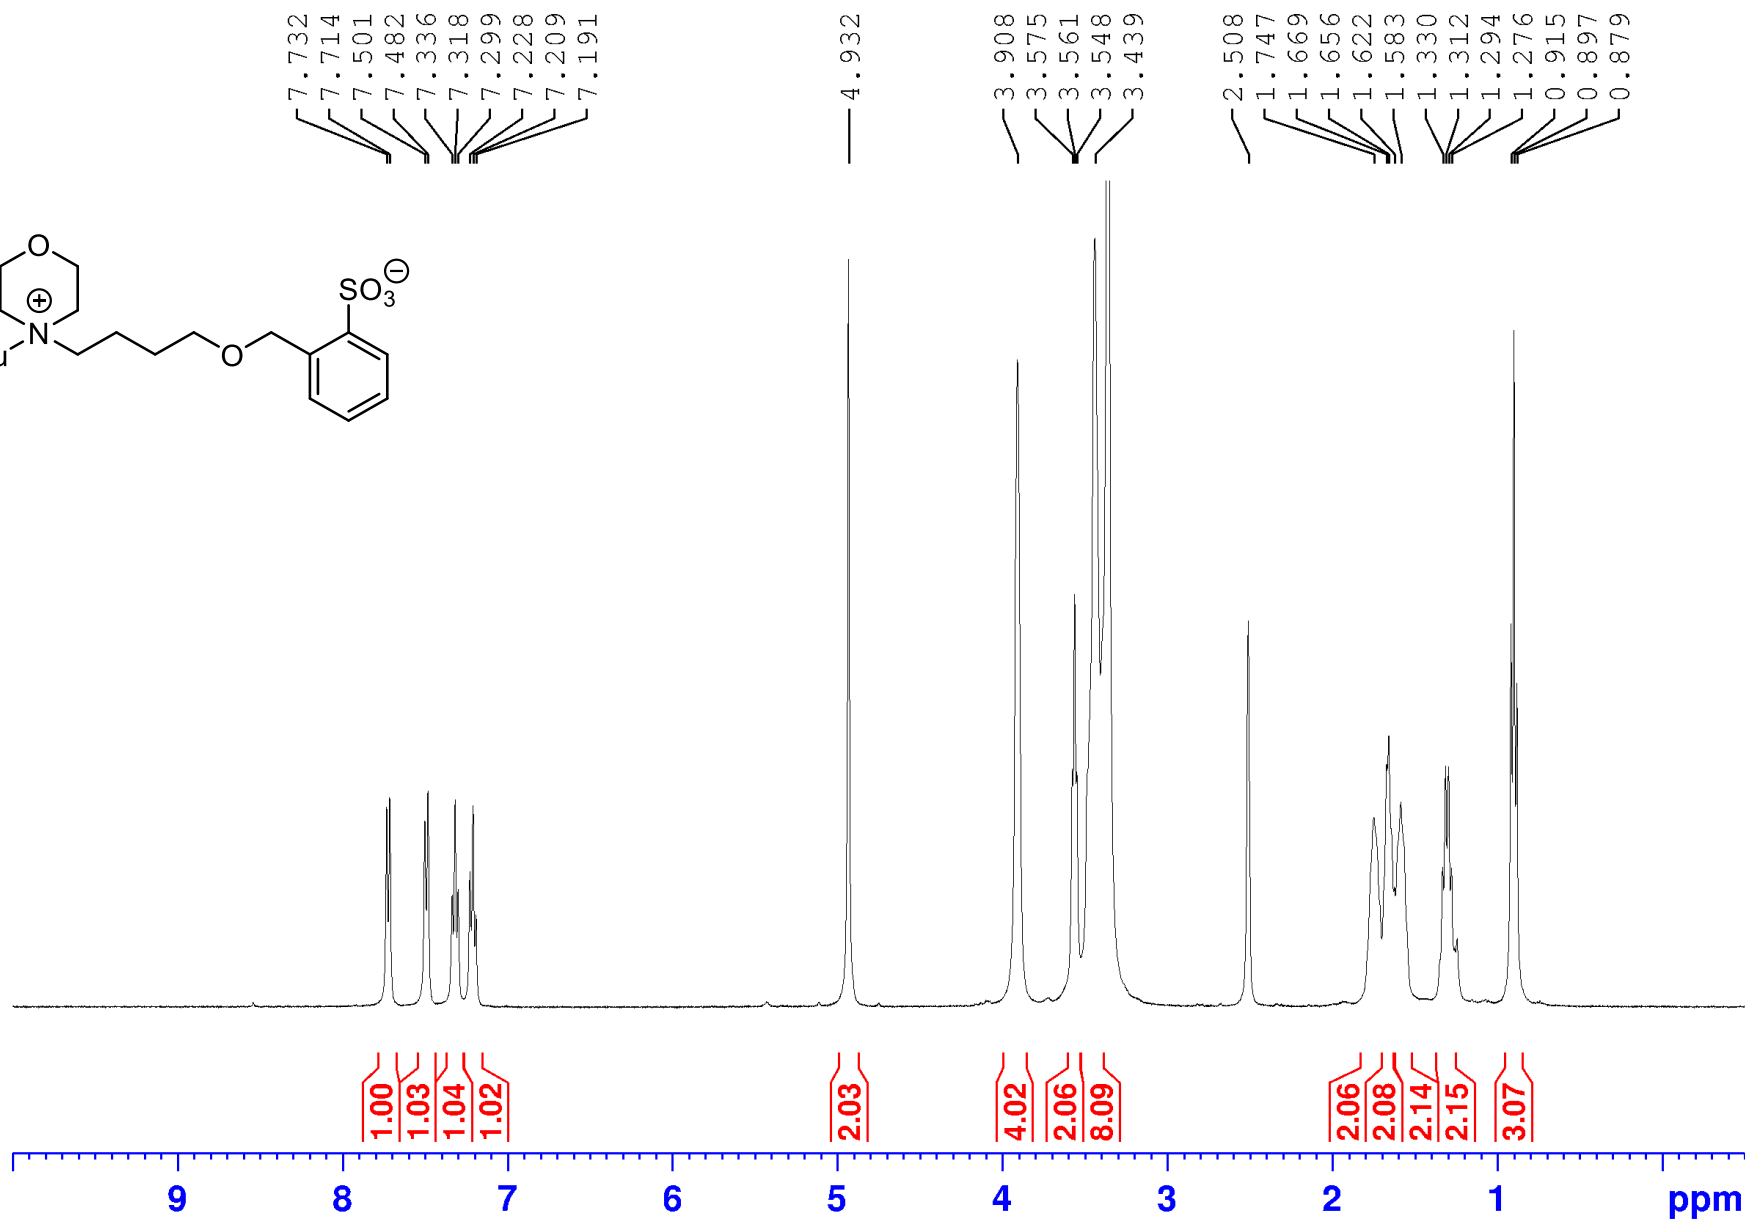

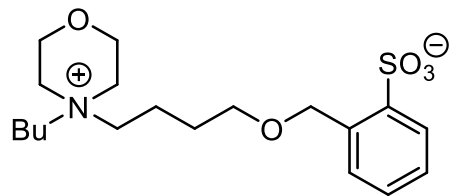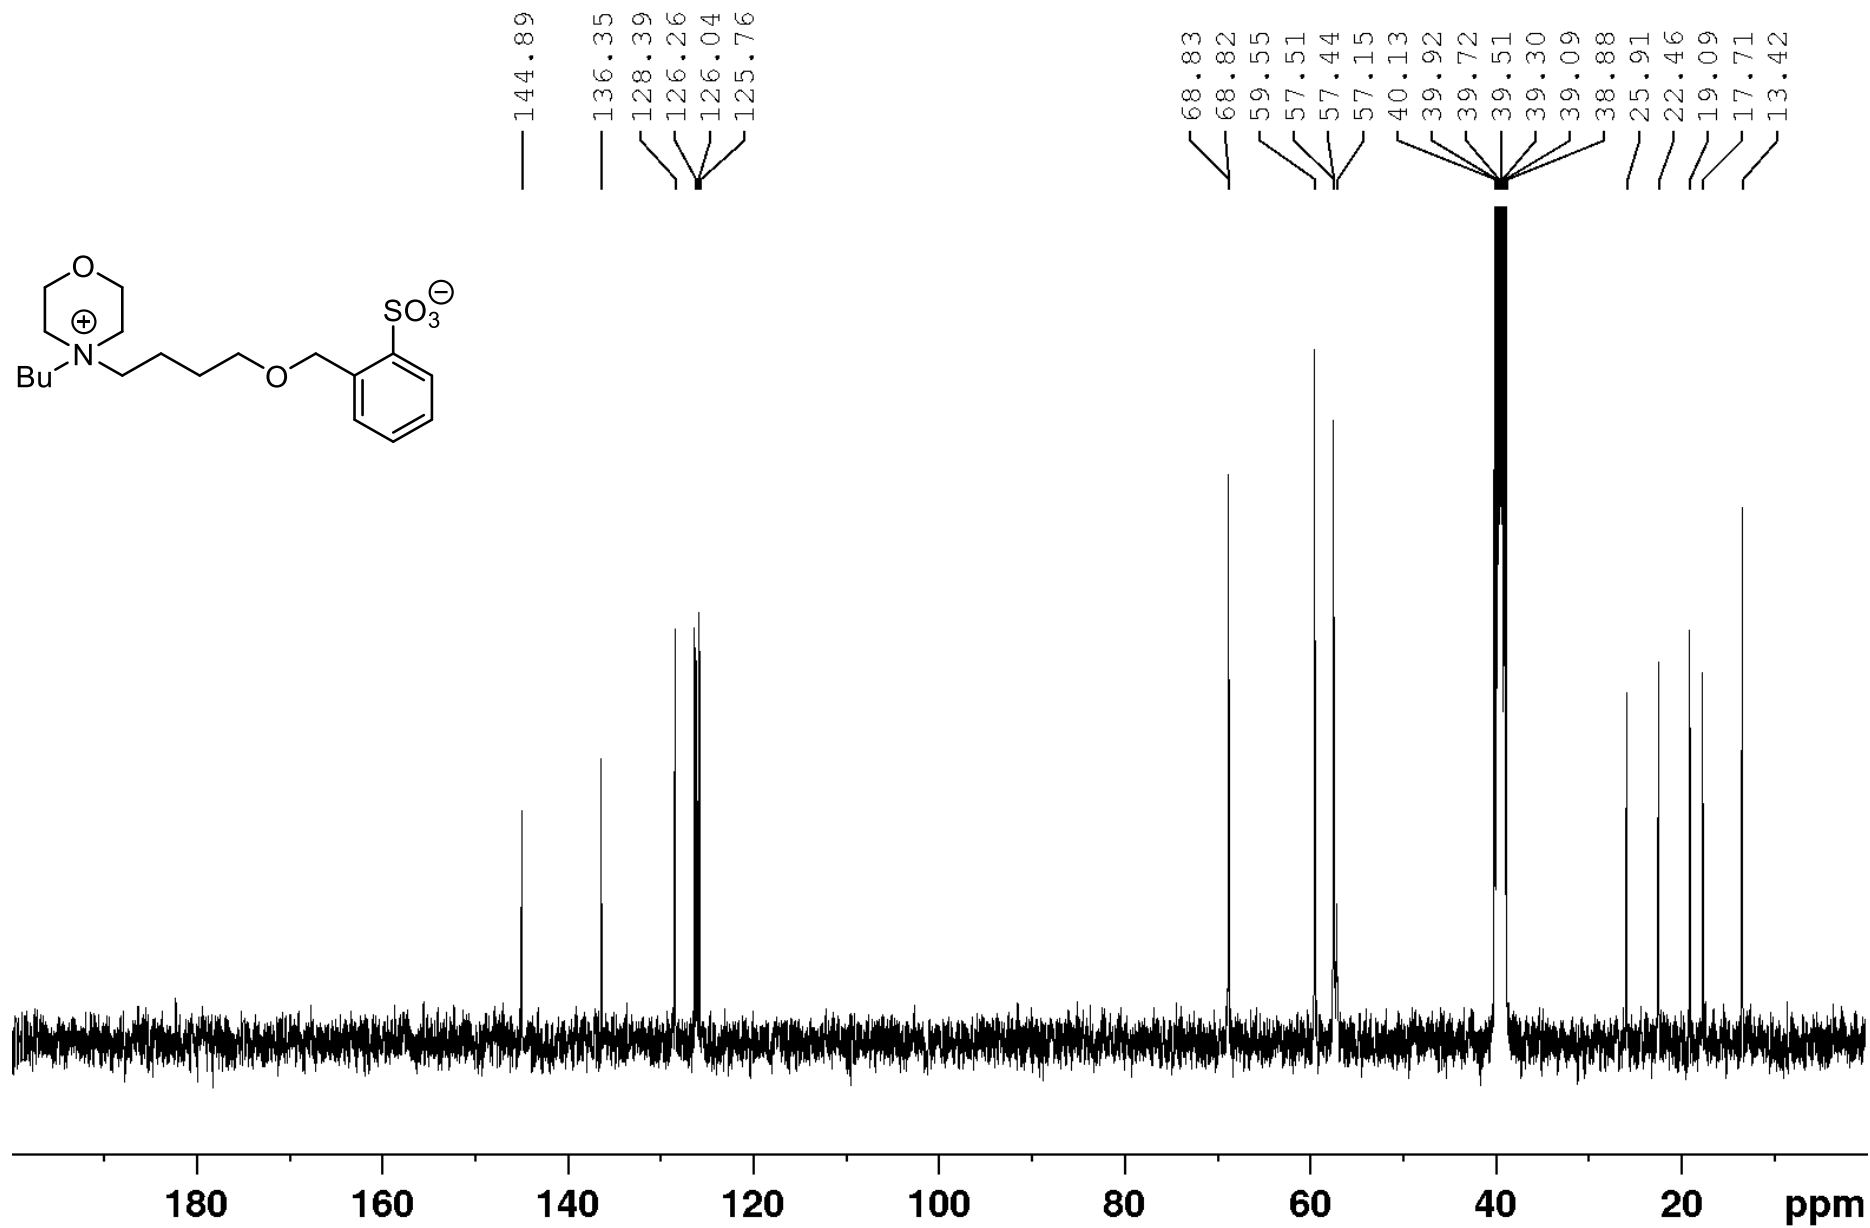



## Spectrum

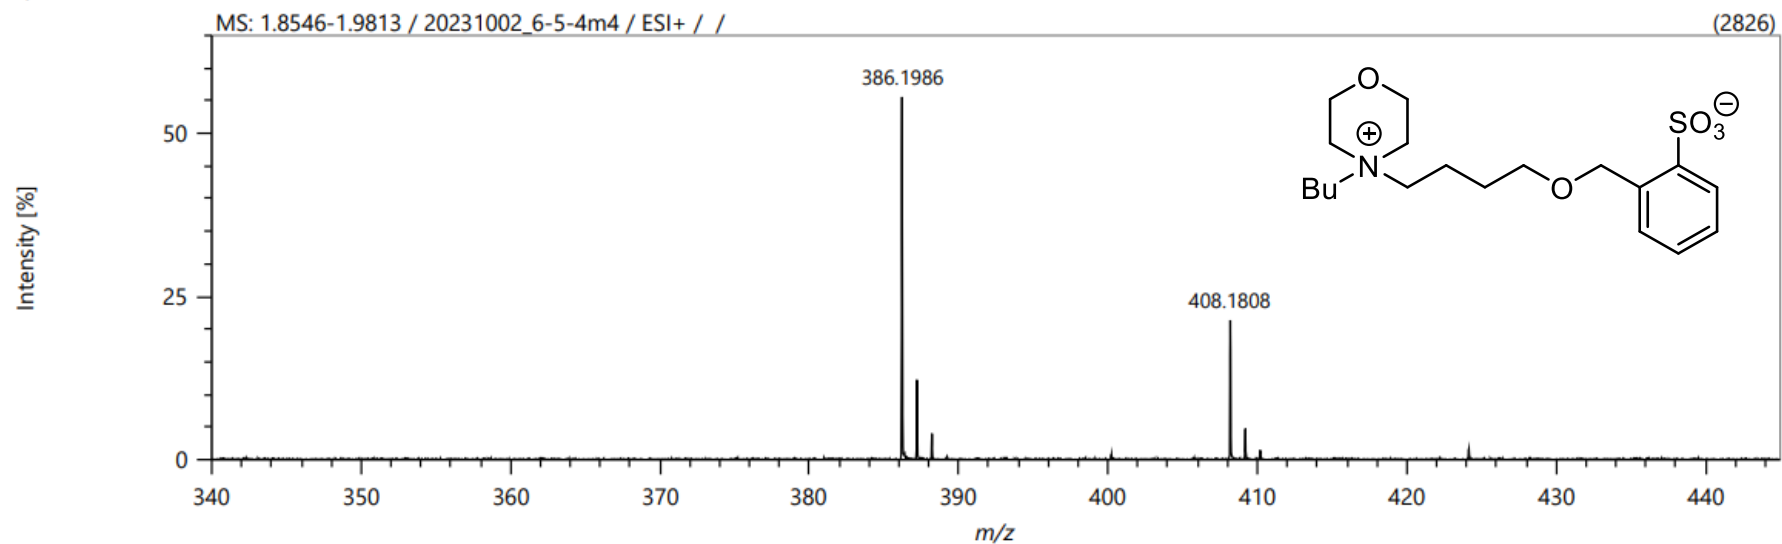

## Elemental Composition

## Parameters

Tolerance:  $\pm 3.00$  ppm  
 Electron: Odd/Even  
 Charge: +1  
 DBE: -99.0 - 999.0

## Elements Set 2:

| Symbol | C   | H    | N | O | S | Na |
|--------|-----|------|---|---|---|----|
| Min    | 0   | 0    | 1 | 5 | 1 | 0  |
| Max    | 400 | 1000 | 1 | 5 | 1 | 1  |

## Results

| Mass      | Formula                                               | Calculated Mass | Mass Difference [mDa] | Mass Difference [ppm] | DBE |
|-----------|-------------------------------------------------------|-----------------|-----------------------|-----------------------|-----|
| 386.19859 | C <sub>19</sub> H <sub>32</sub> N O <sub>5</sub> S    | 386.19957       | -0.98                 | -2.53                 | 4.5 |
| 408.18084 | C <sub>19</sub> H <sub>31</sub> N O <sub>5</sub> Na S | 408.18151       | -0.67                 | -1.65                 | 4.5 |

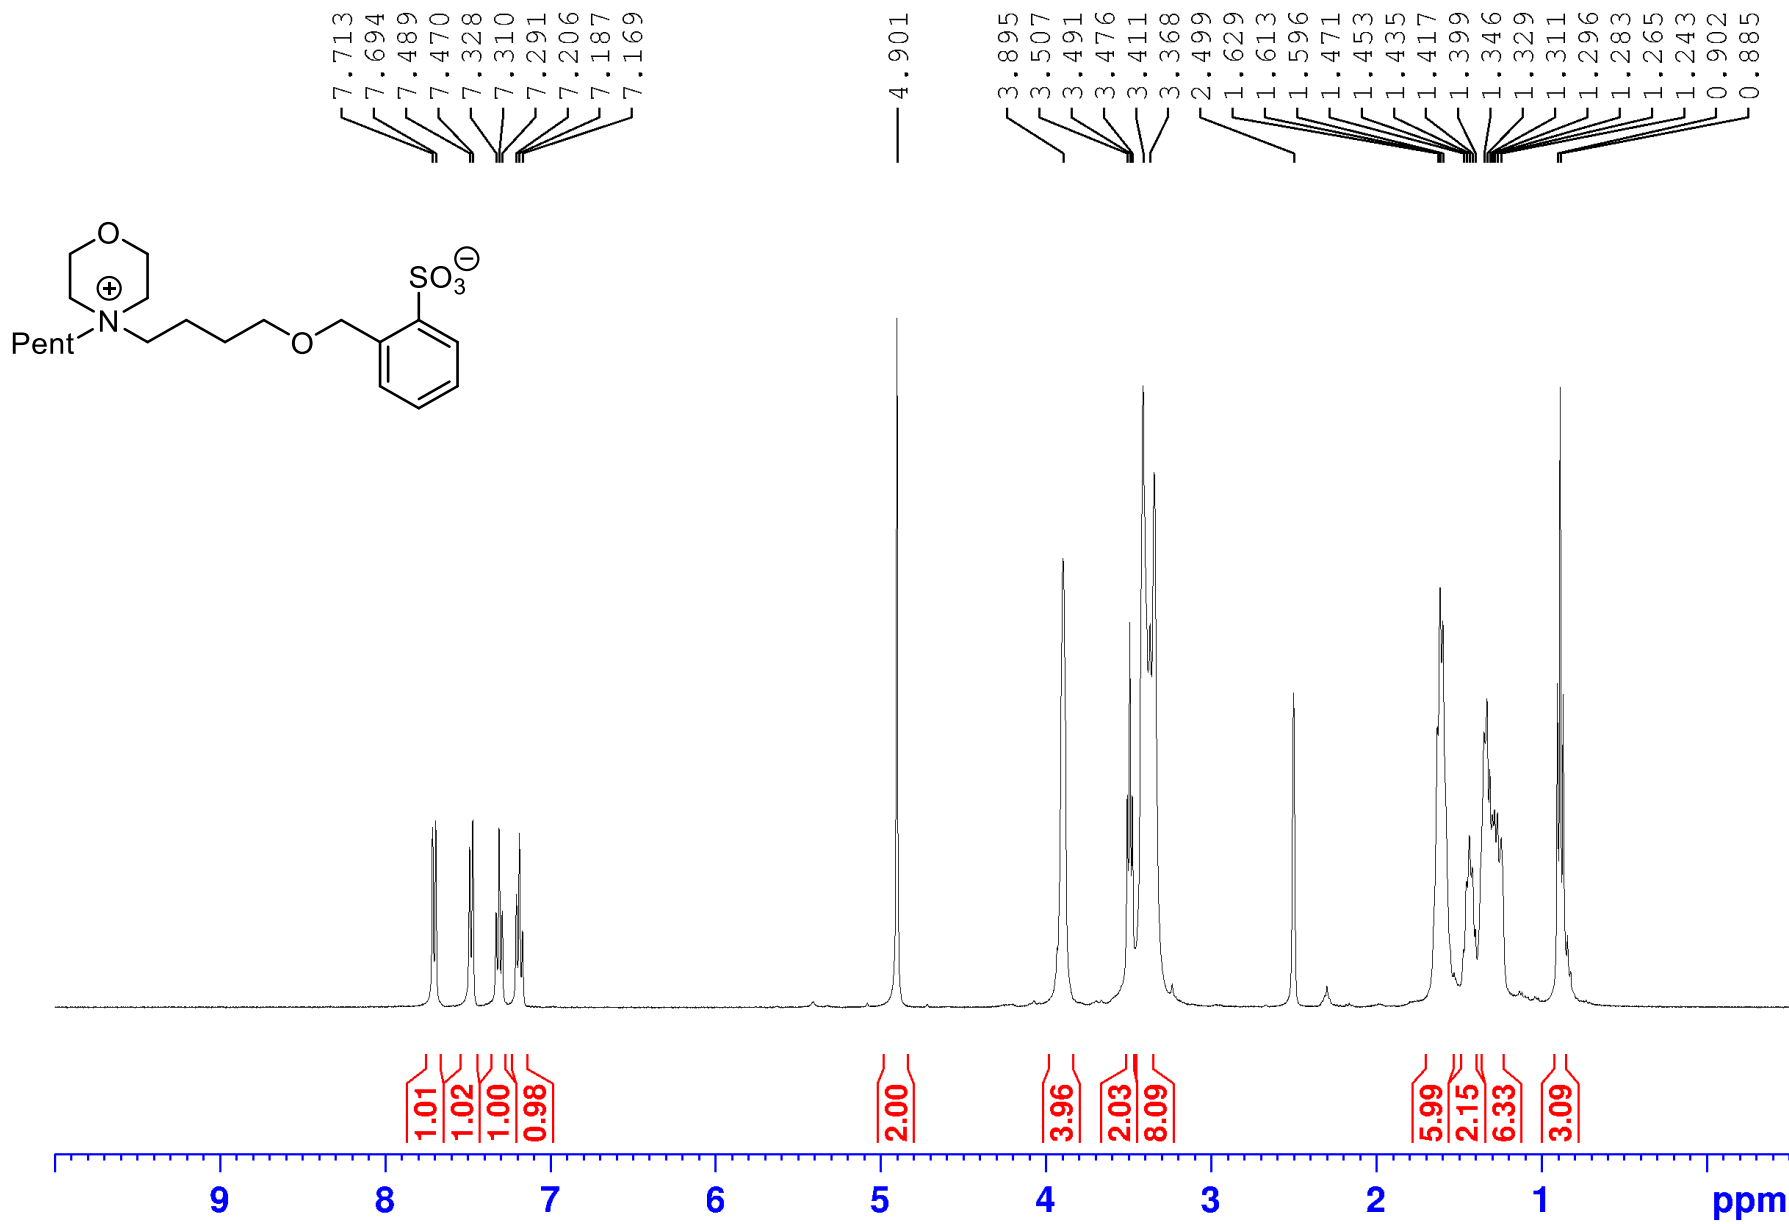

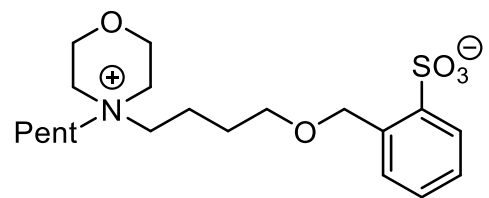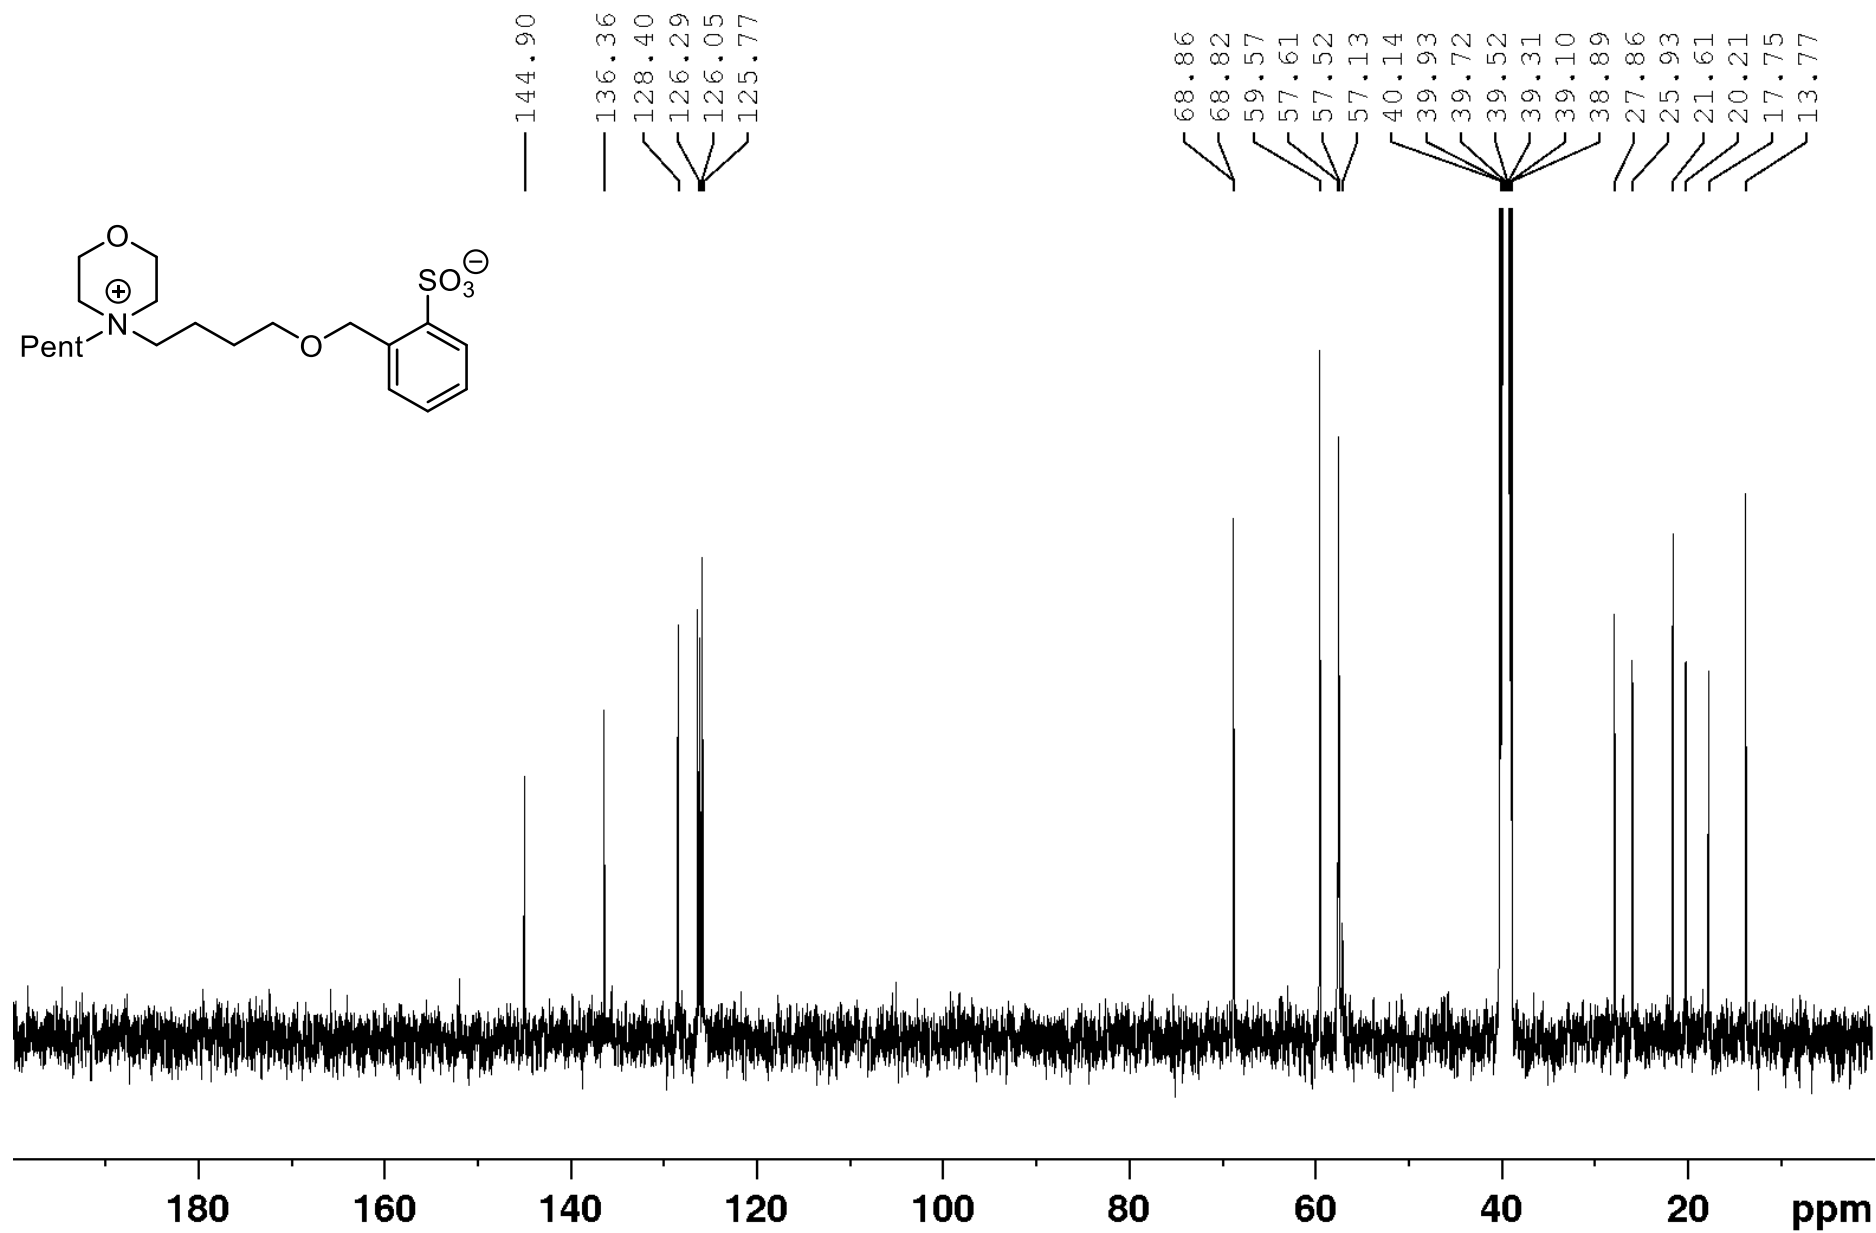

Spectrum

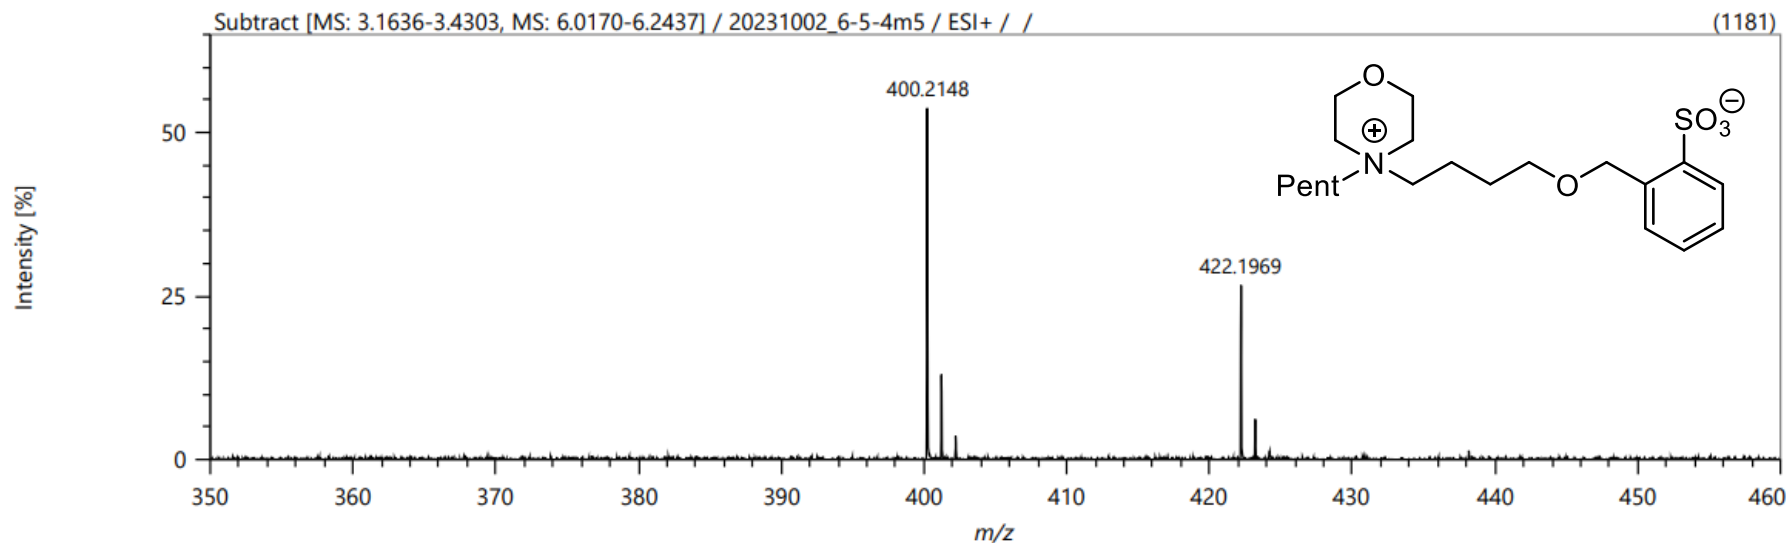

Elemental Composition

Parameters

Tolerance: ±2.00 ppm  
 Electron: Odd/Even  
 Charge: +1  
 DBE: -99.0 - 999.0

Elements Set 2:

| Symbol | C   | H    | N | O | S | Na |
|--------|-----|------|---|---|---|----|
| Min    | 0   | 0    | 1 | 5 | 1 | 0  |
| Max    | 400 | 1000 | 1 | 5 | 1 | 1  |

Results

| Mass      | Formula                                               | Calculated Mass | Mass Difference [mDa] | Mass Difference [ppm] | DBE |
|-----------|-------------------------------------------------------|-----------------|-----------------------|-----------------------|-----|
| 400.21480 | C <sub>20</sub> H <sub>34</sub> N O <sub>5</sub> S    | 400.21522       | -0.42                 | -1.05                 | 4.5 |
| 422.19692 | C <sub>20</sub> H <sub>33</sub> N O <sub>5</sub> Na S | 422.19716       | -0.24                 | -0.57                 | 4.5 |

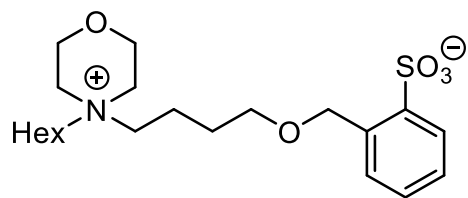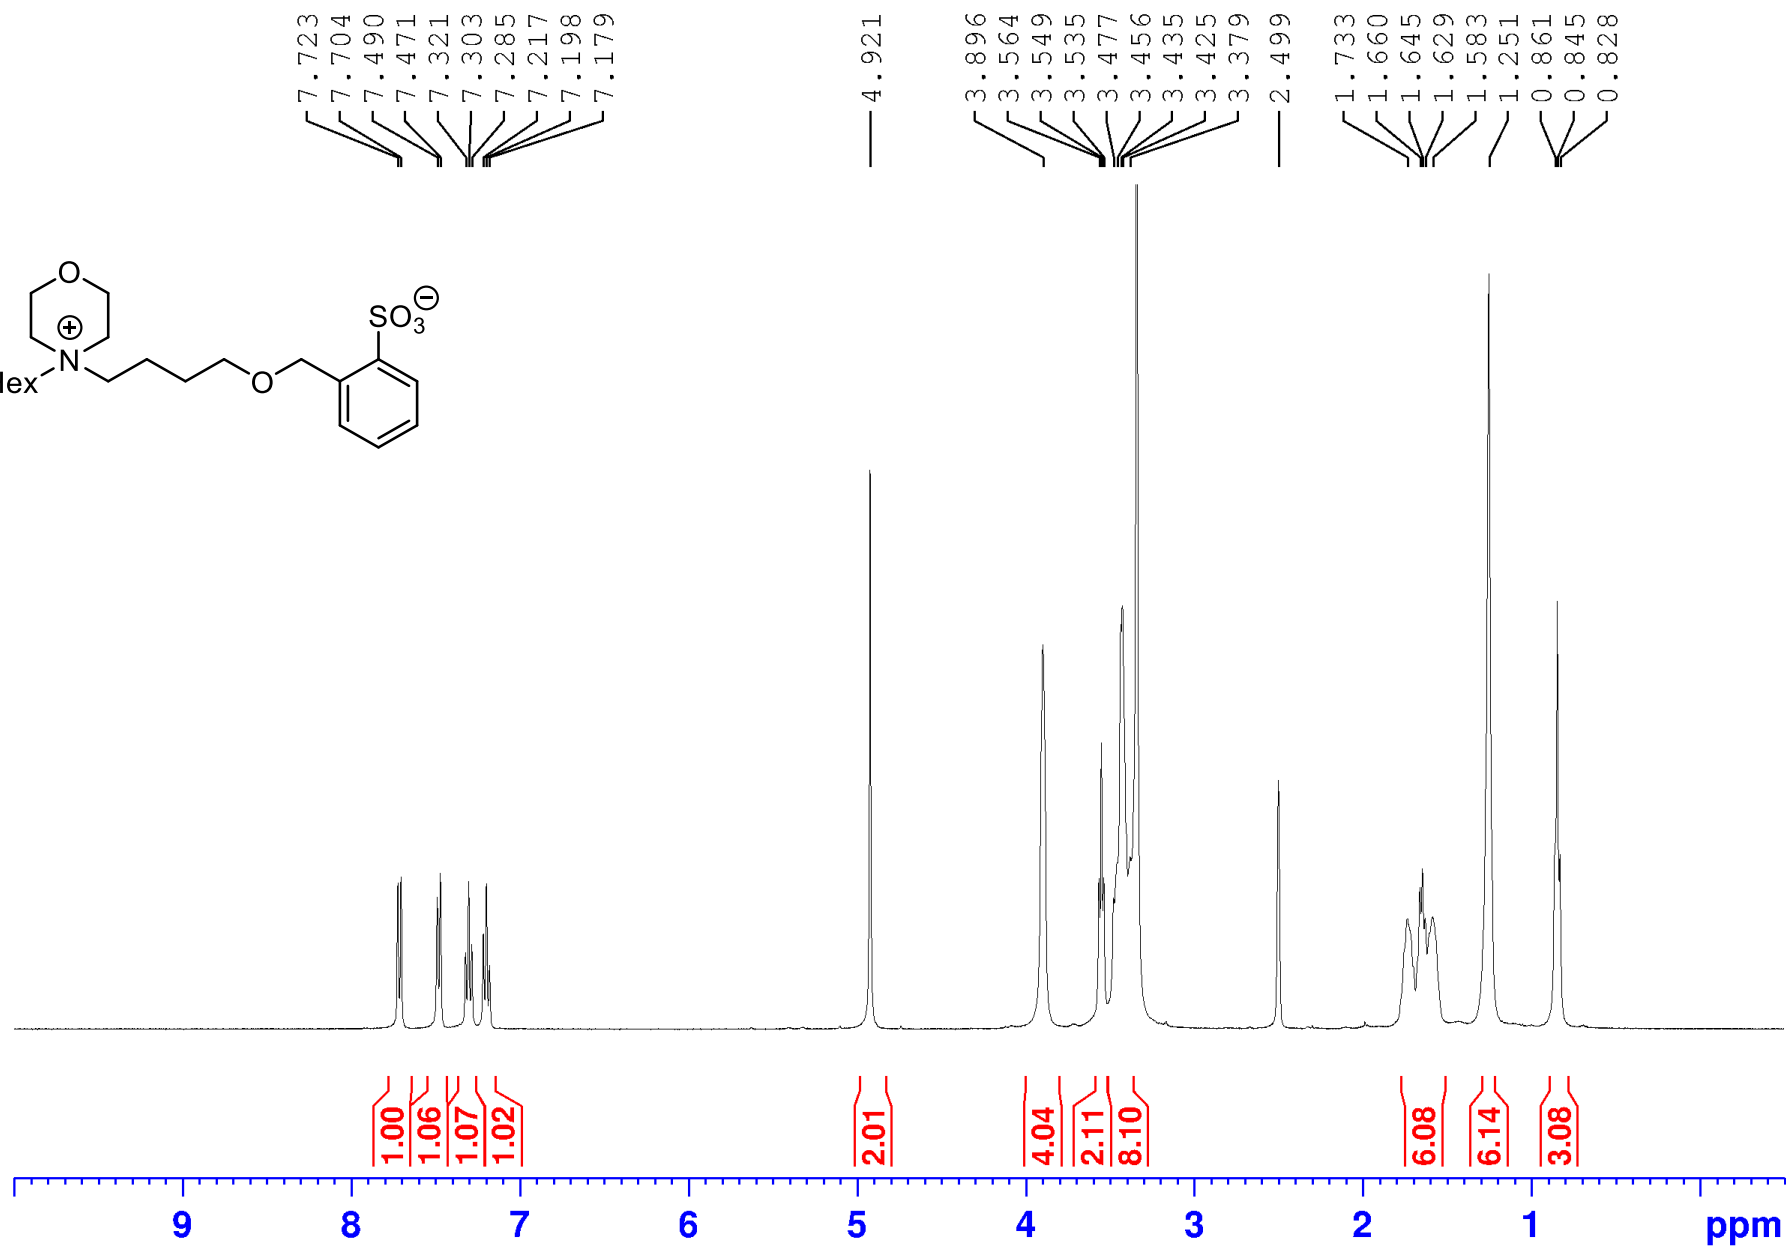

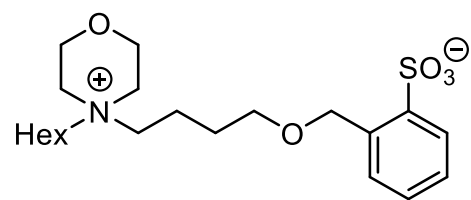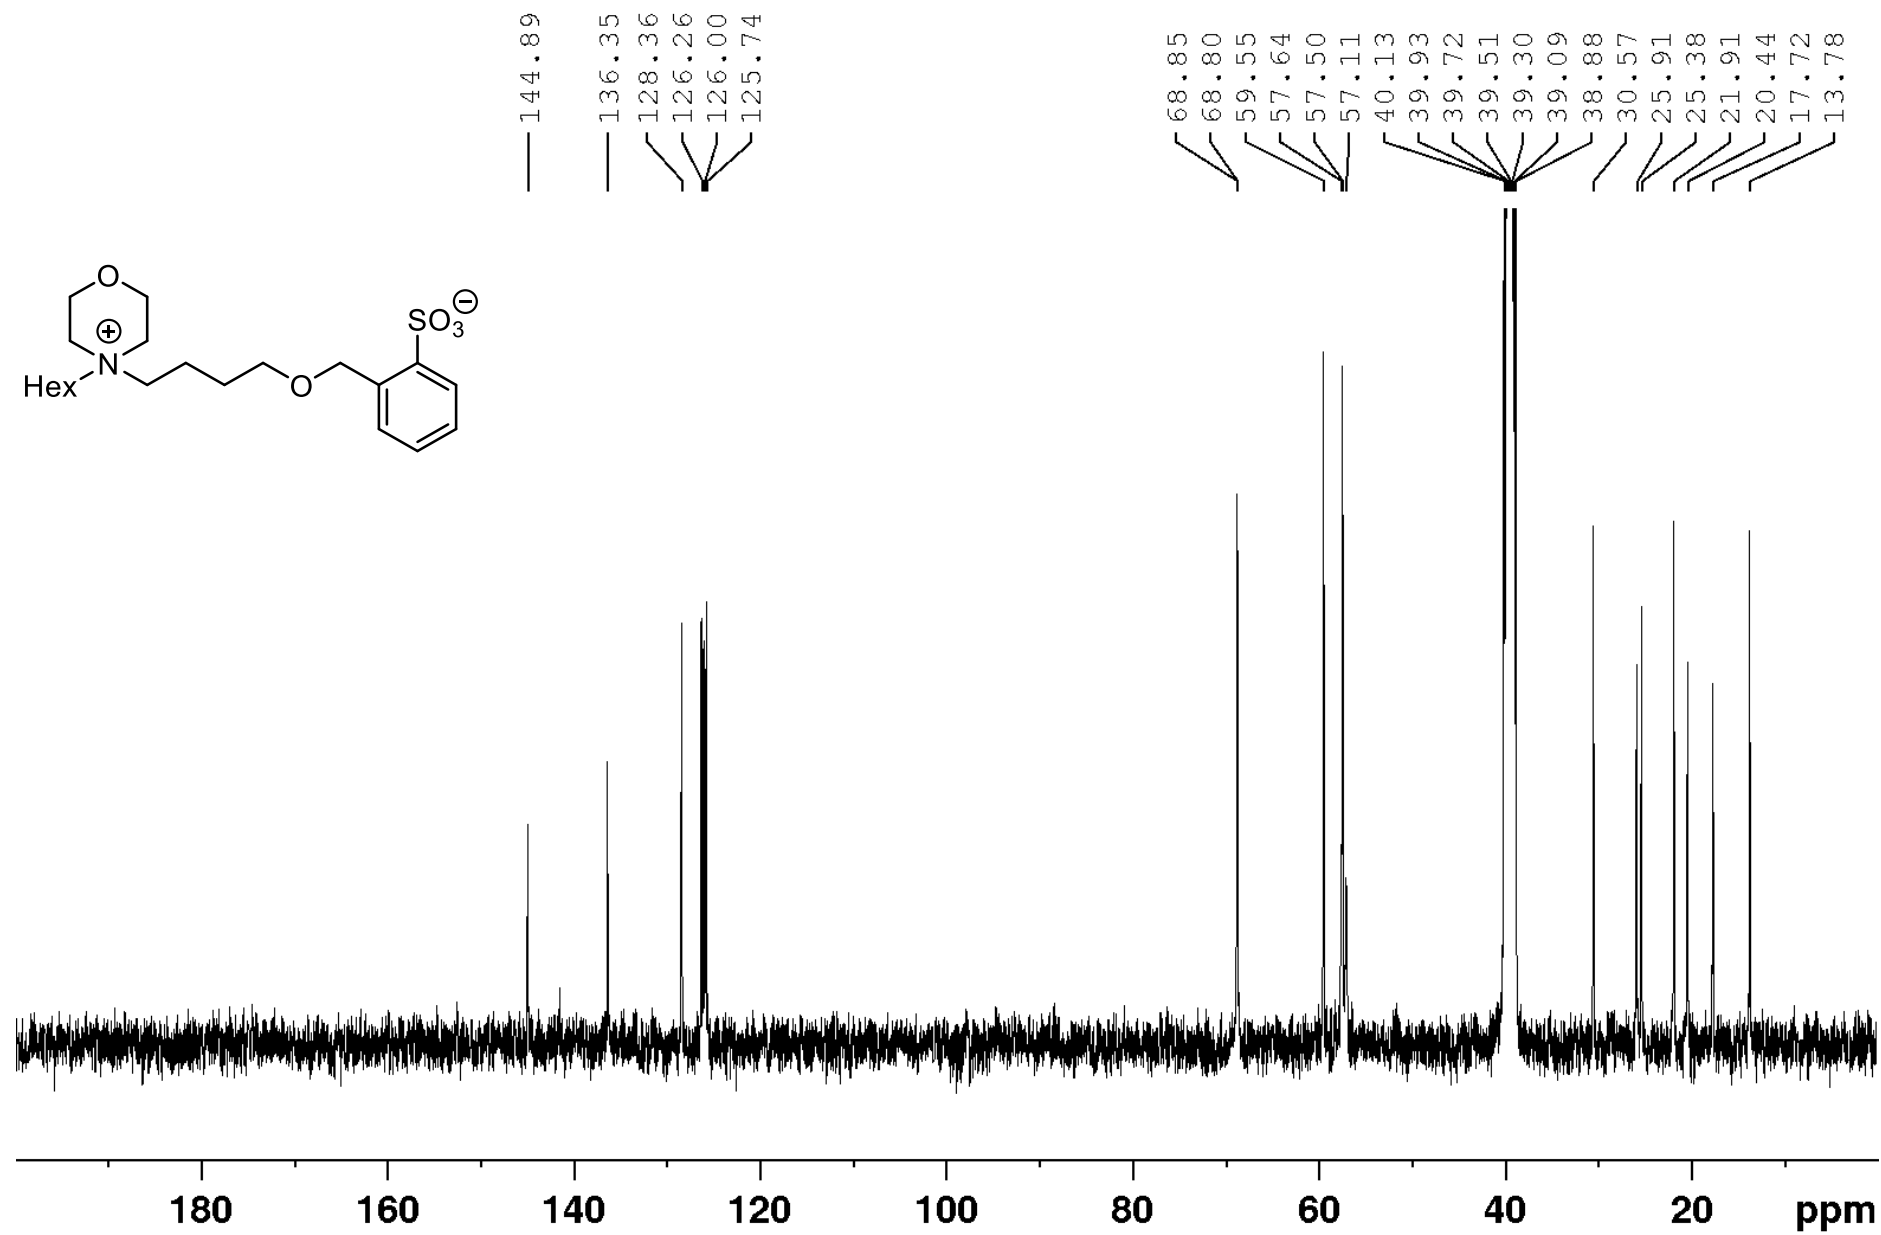

Spectrum

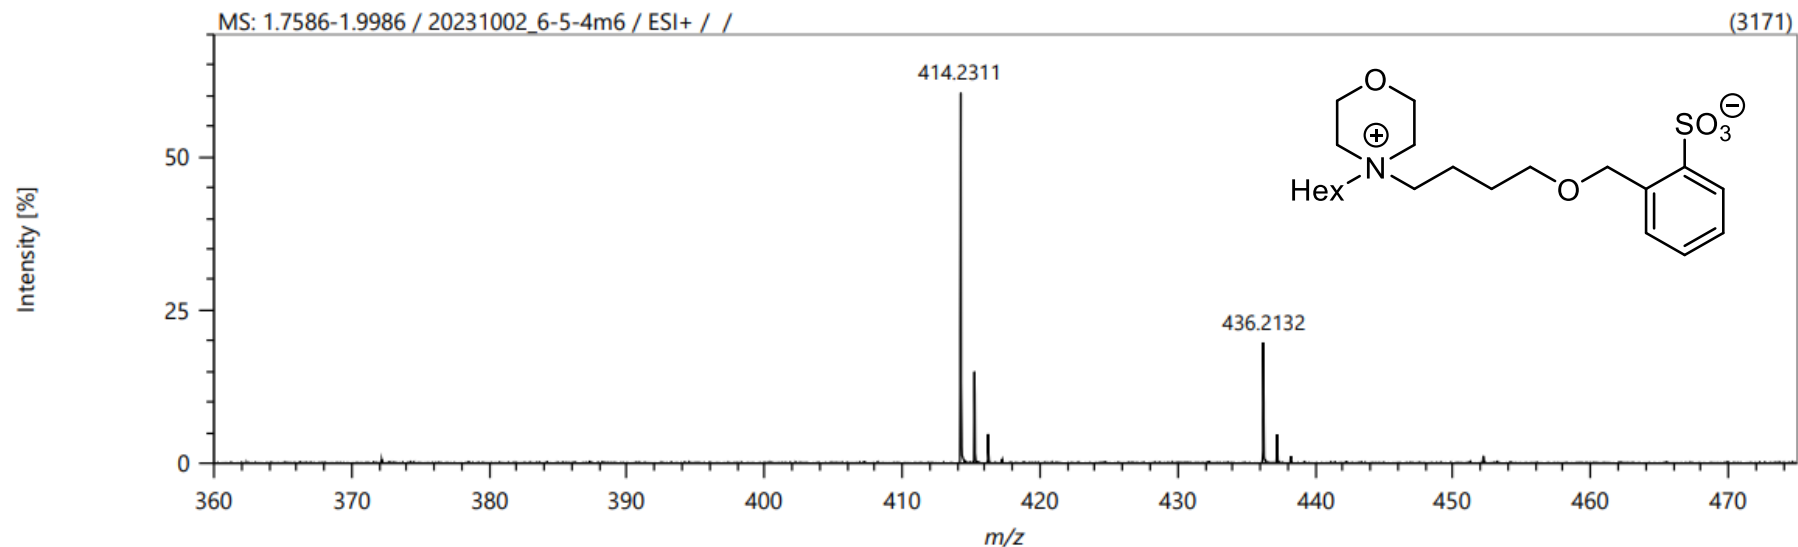

Elemental Composition

Parameters

Tolerance: ±3.00 ppm  
 Electron: Odd/Even  
 Charge: +1  
 DBE: -99.0 - 999.0

Elements Set 2:

| Symbol | C   | H    | N | O | S | Na |
|--------|-----|------|---|---|---|----|
| Min    | 0   | 0    | 1 | 5 | 1 | 0  |
| Max    | 400 | 1000 | 1 | 5 | 1 | 1  |

Results

| Mass      | Formula                                               | Calculated Mass | Mass Difference [mDa] | Mass Difference [ppm] | DBE |
|-----------|-------------------------------------------------------|-----------------|-----------------------|-----------------------|-----|
| 414.23111 | C <sub>21</sub> H <sub>36</sub> N O <sub>5</sub> S    | 414.23087       | 0.24                  | 0.59                  | 4.5 |
| 436.21323 | C <sub>21</sub> H <sub>35</sub> N O <sub>5</sub> Na S | 436.21282       | 0.41                  | 0.94                  | 4.5 |

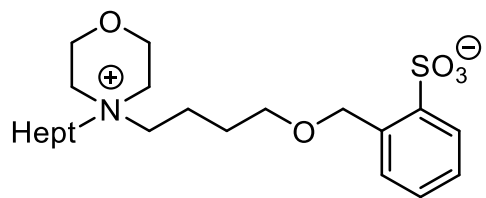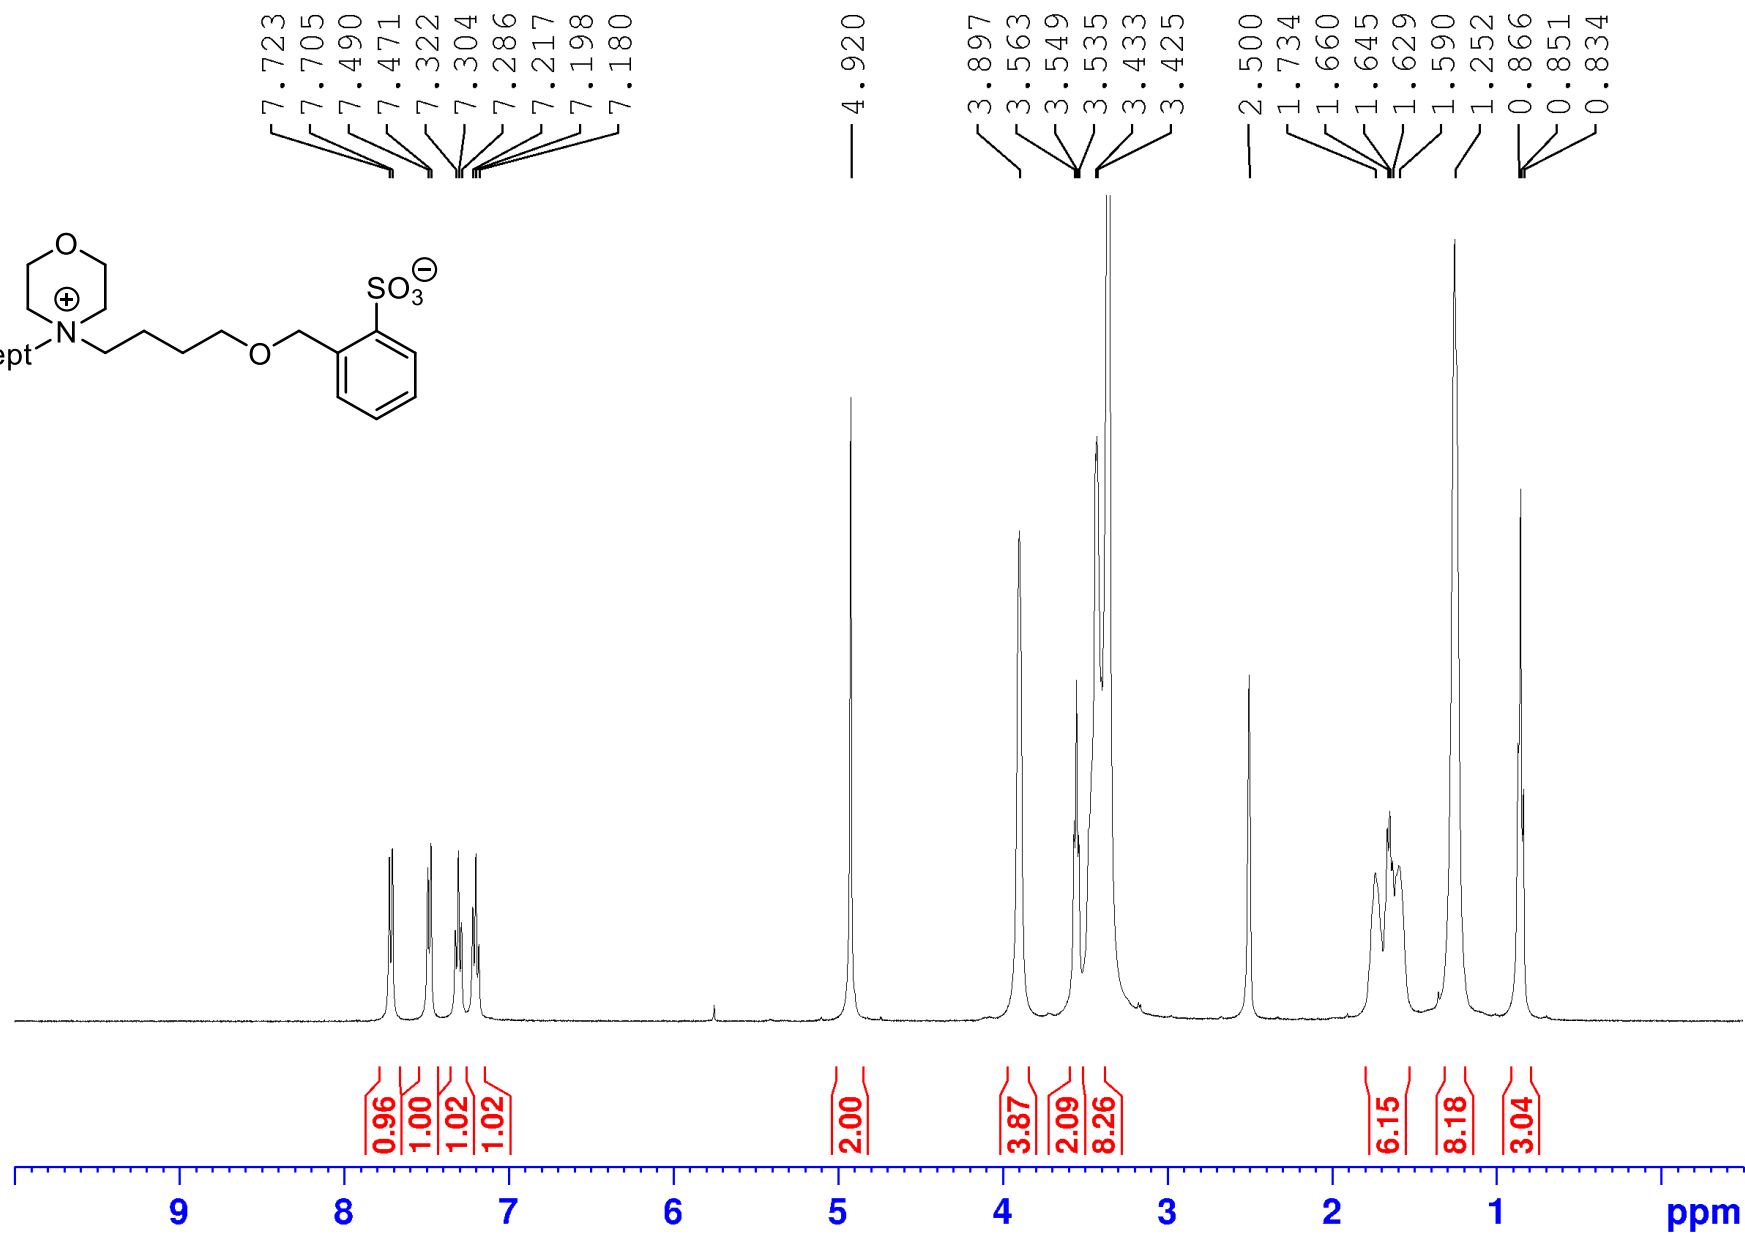



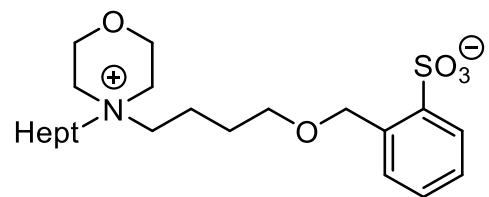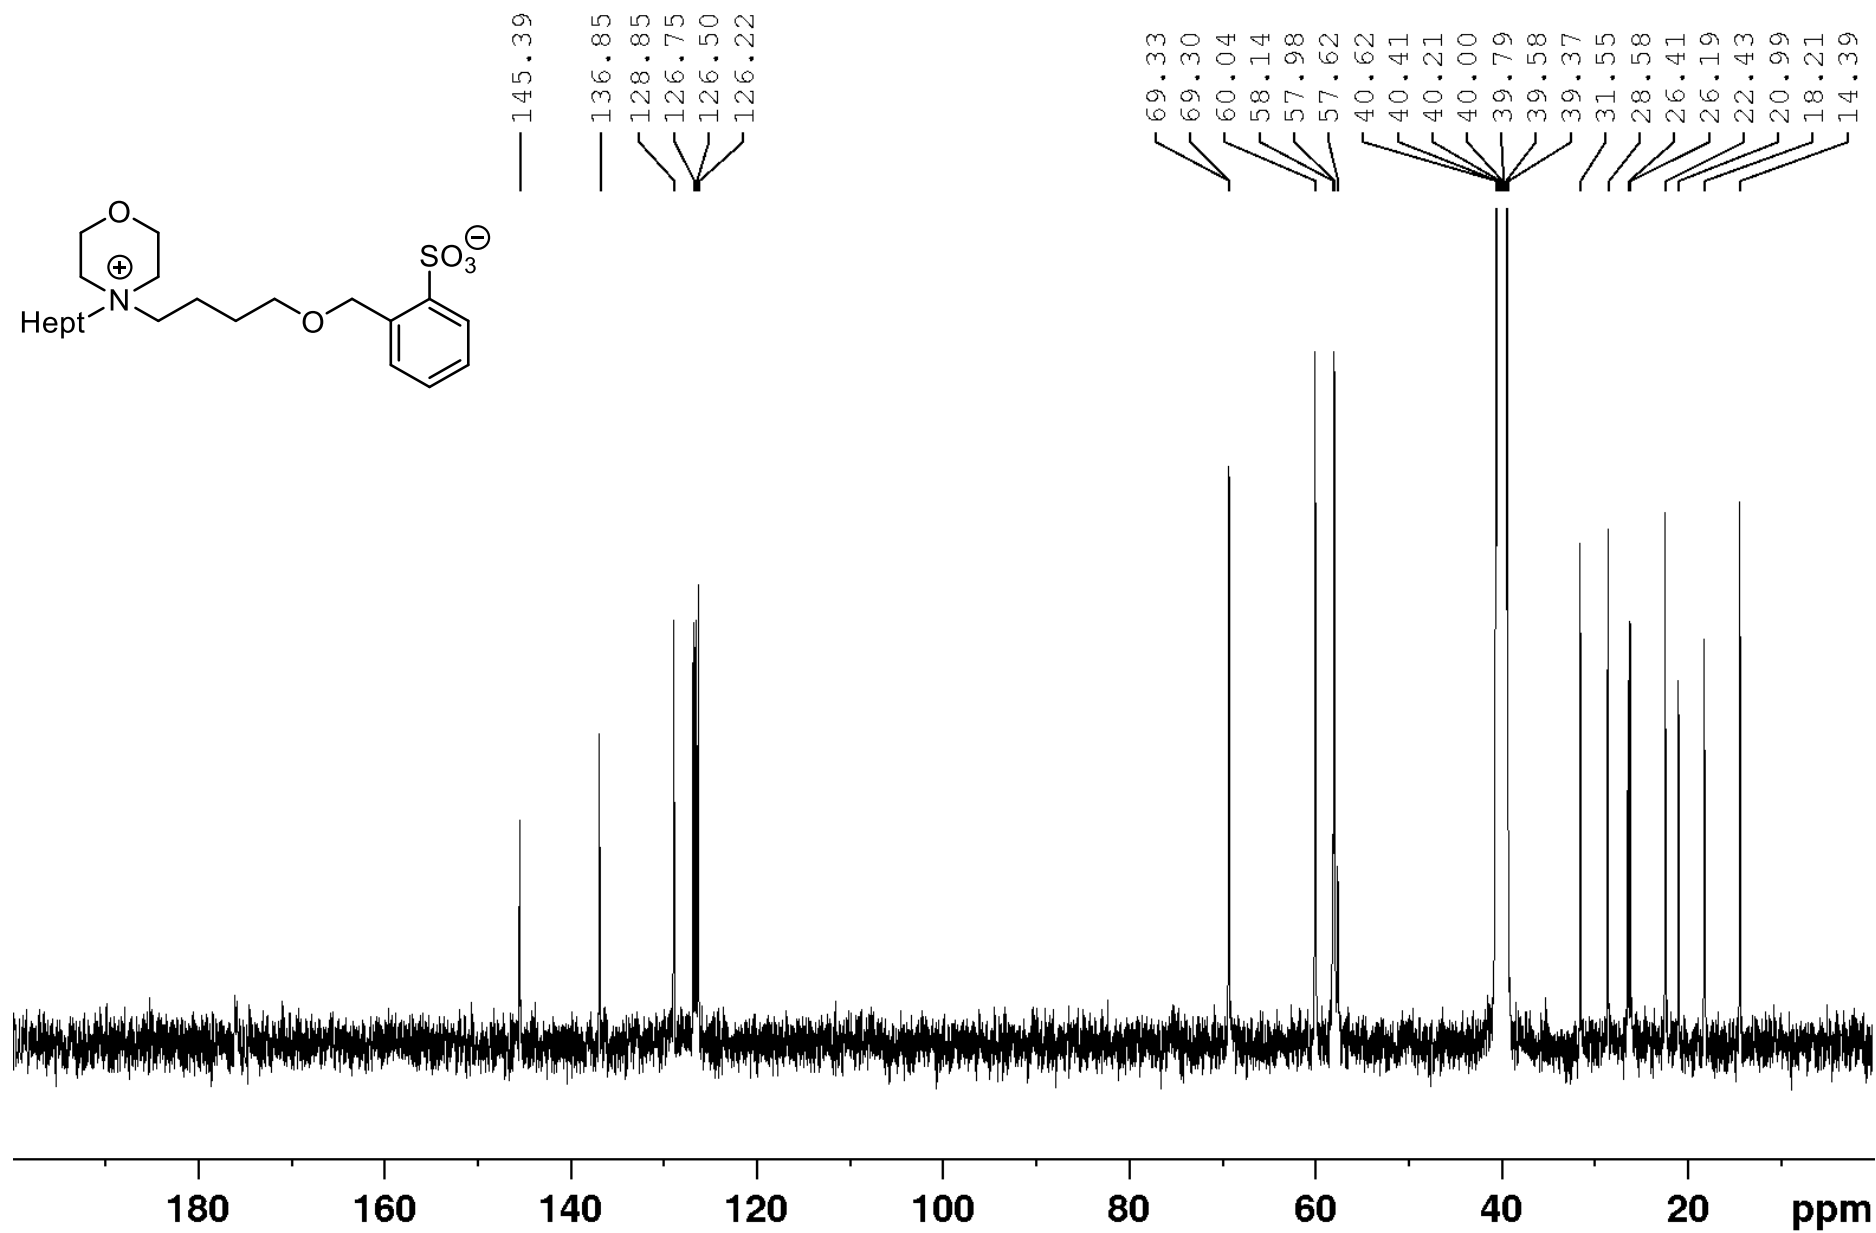

Spectrum

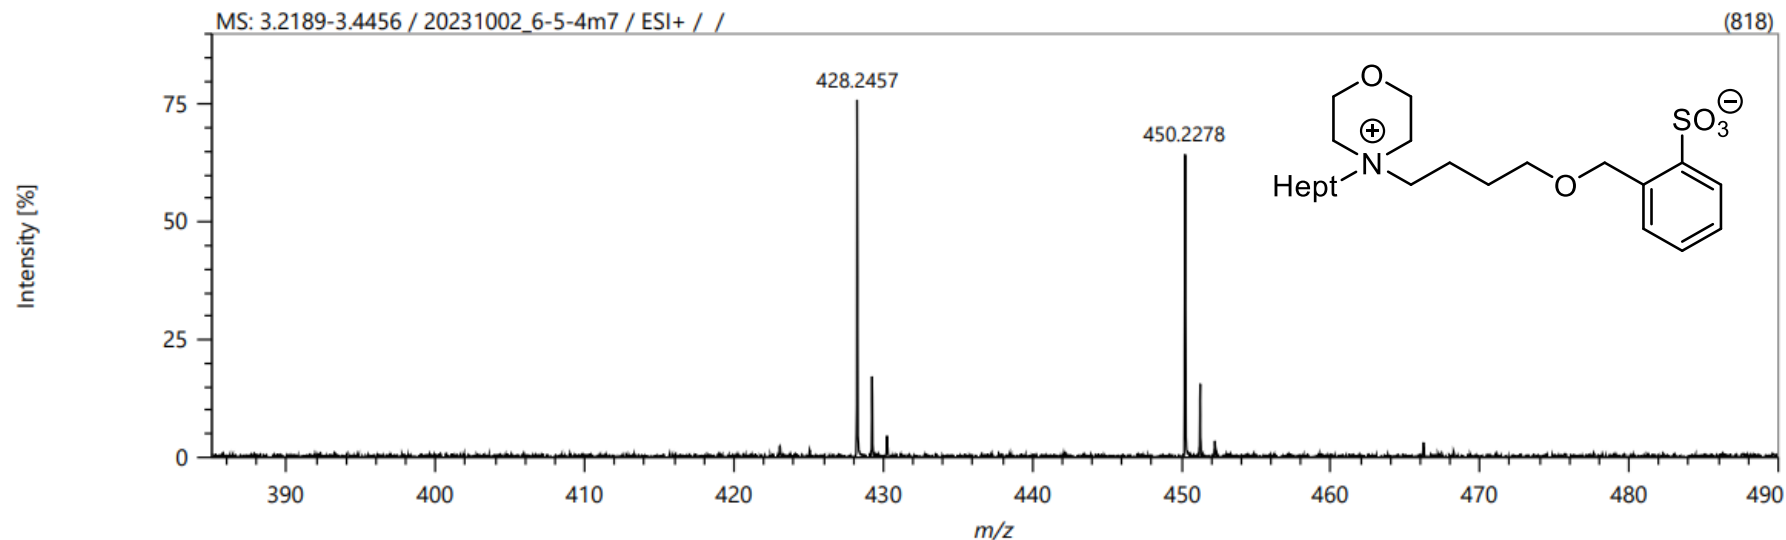

Elemental Composition

Parameters

Tolerance: ±2.00 ppm  
 Electron: Odd/Even  
 Charge: +1  
 DBE: -99.0 - 999.0

Elements Set 2:

| Symbol | C   | H    | N | O | S | Na |
|--------|-----|------|---|---|---|----|
| Min    | 0   | 0    | 1 | 5 | 1 | 0  |
| Max    | 400 | 1000 | 1 | 5 | 1 | 1  |

Results

| Mass      | Formula                                               | Calculated Mass | Mass Difference [mDa] | Mass Difference [ppm] | DBE |
|-----------|-------------------------------------------------------|-----------------|-----------------------|-----------------------|-----|
| 428.24570 | C <sub>22</sub> H <sub>38</sub> N O <sub>5</sub> S    | 428.24652       | -0.82                 | -1.91                 | 4.5 |
| 450.22784 | C <sub>22</sub> H <sub>37</sub> N O <sub>5</sub> Na S | 450.22847       | -0.62                 | -1.39                 | 4.5 |

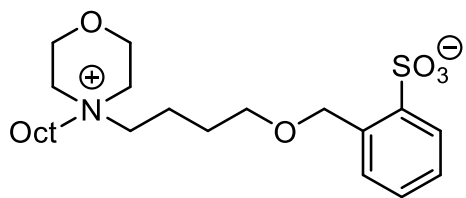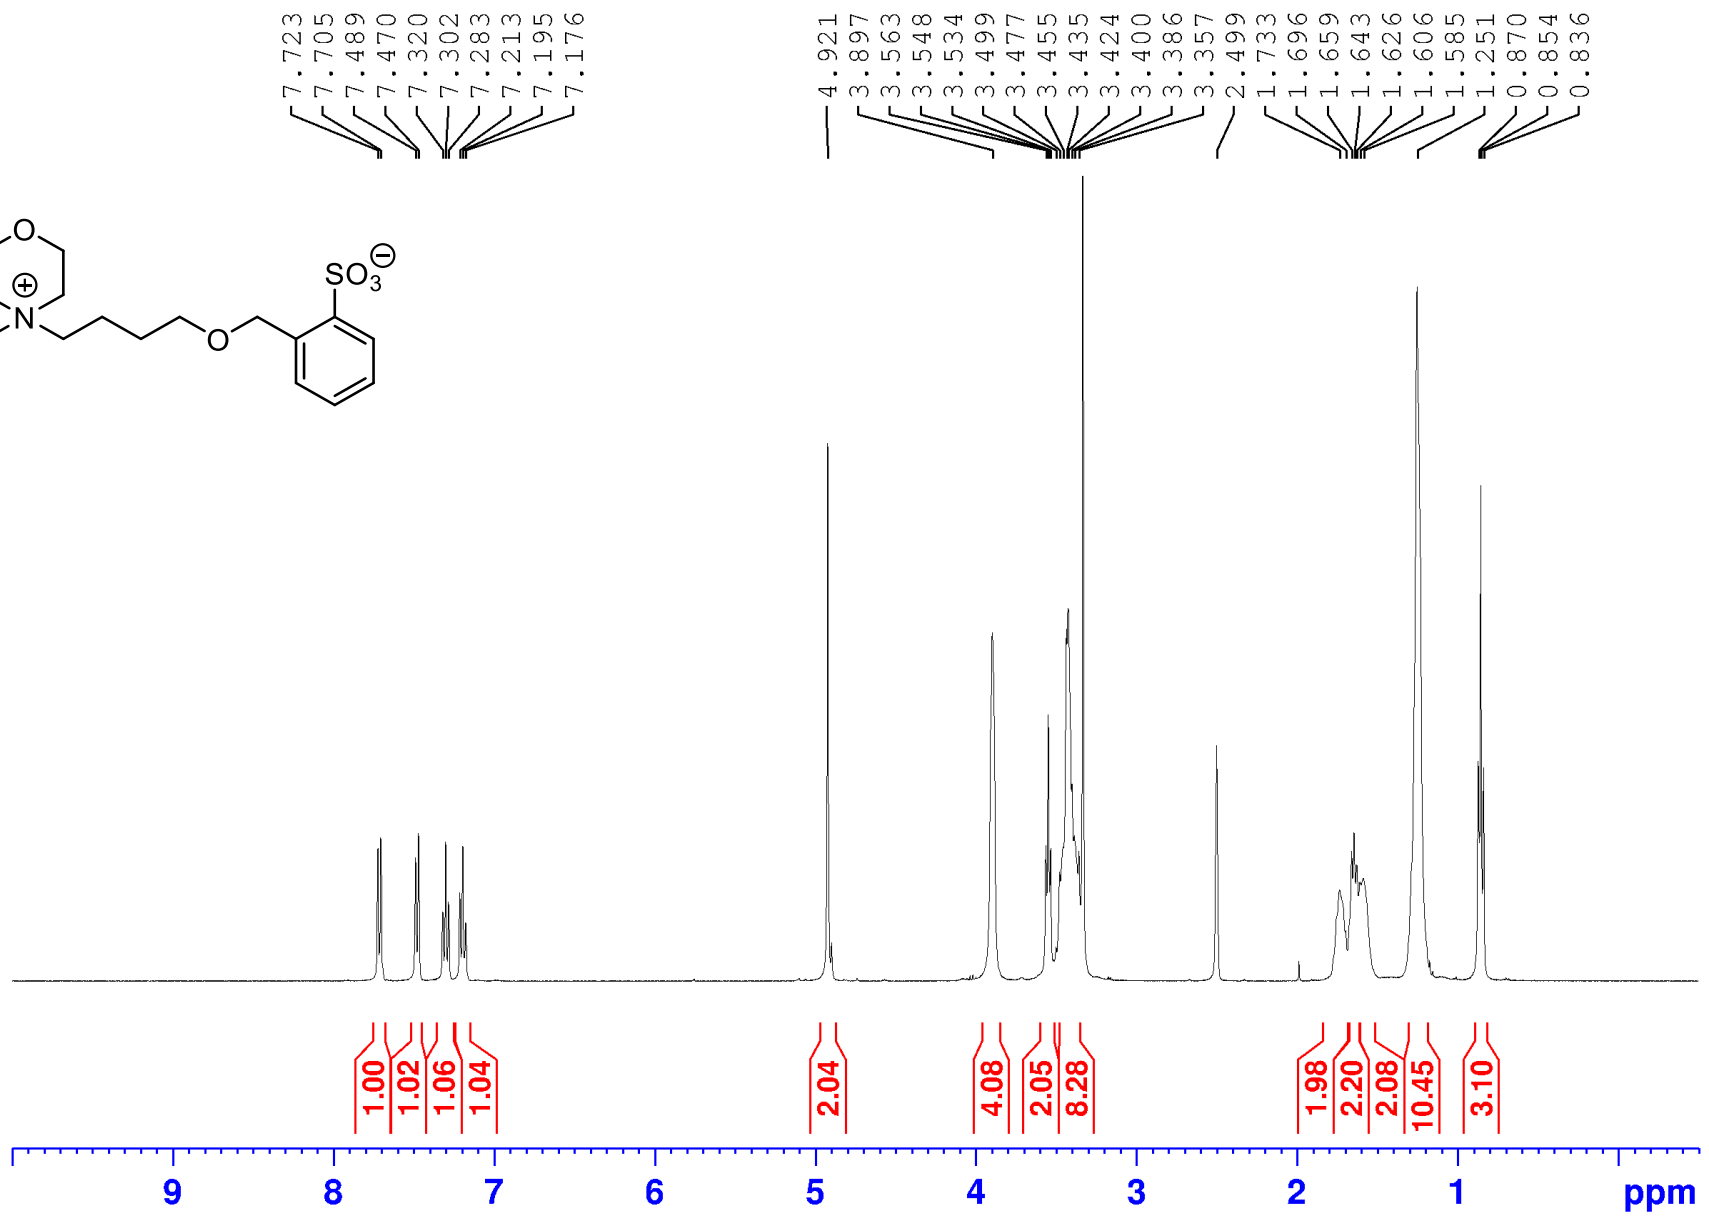

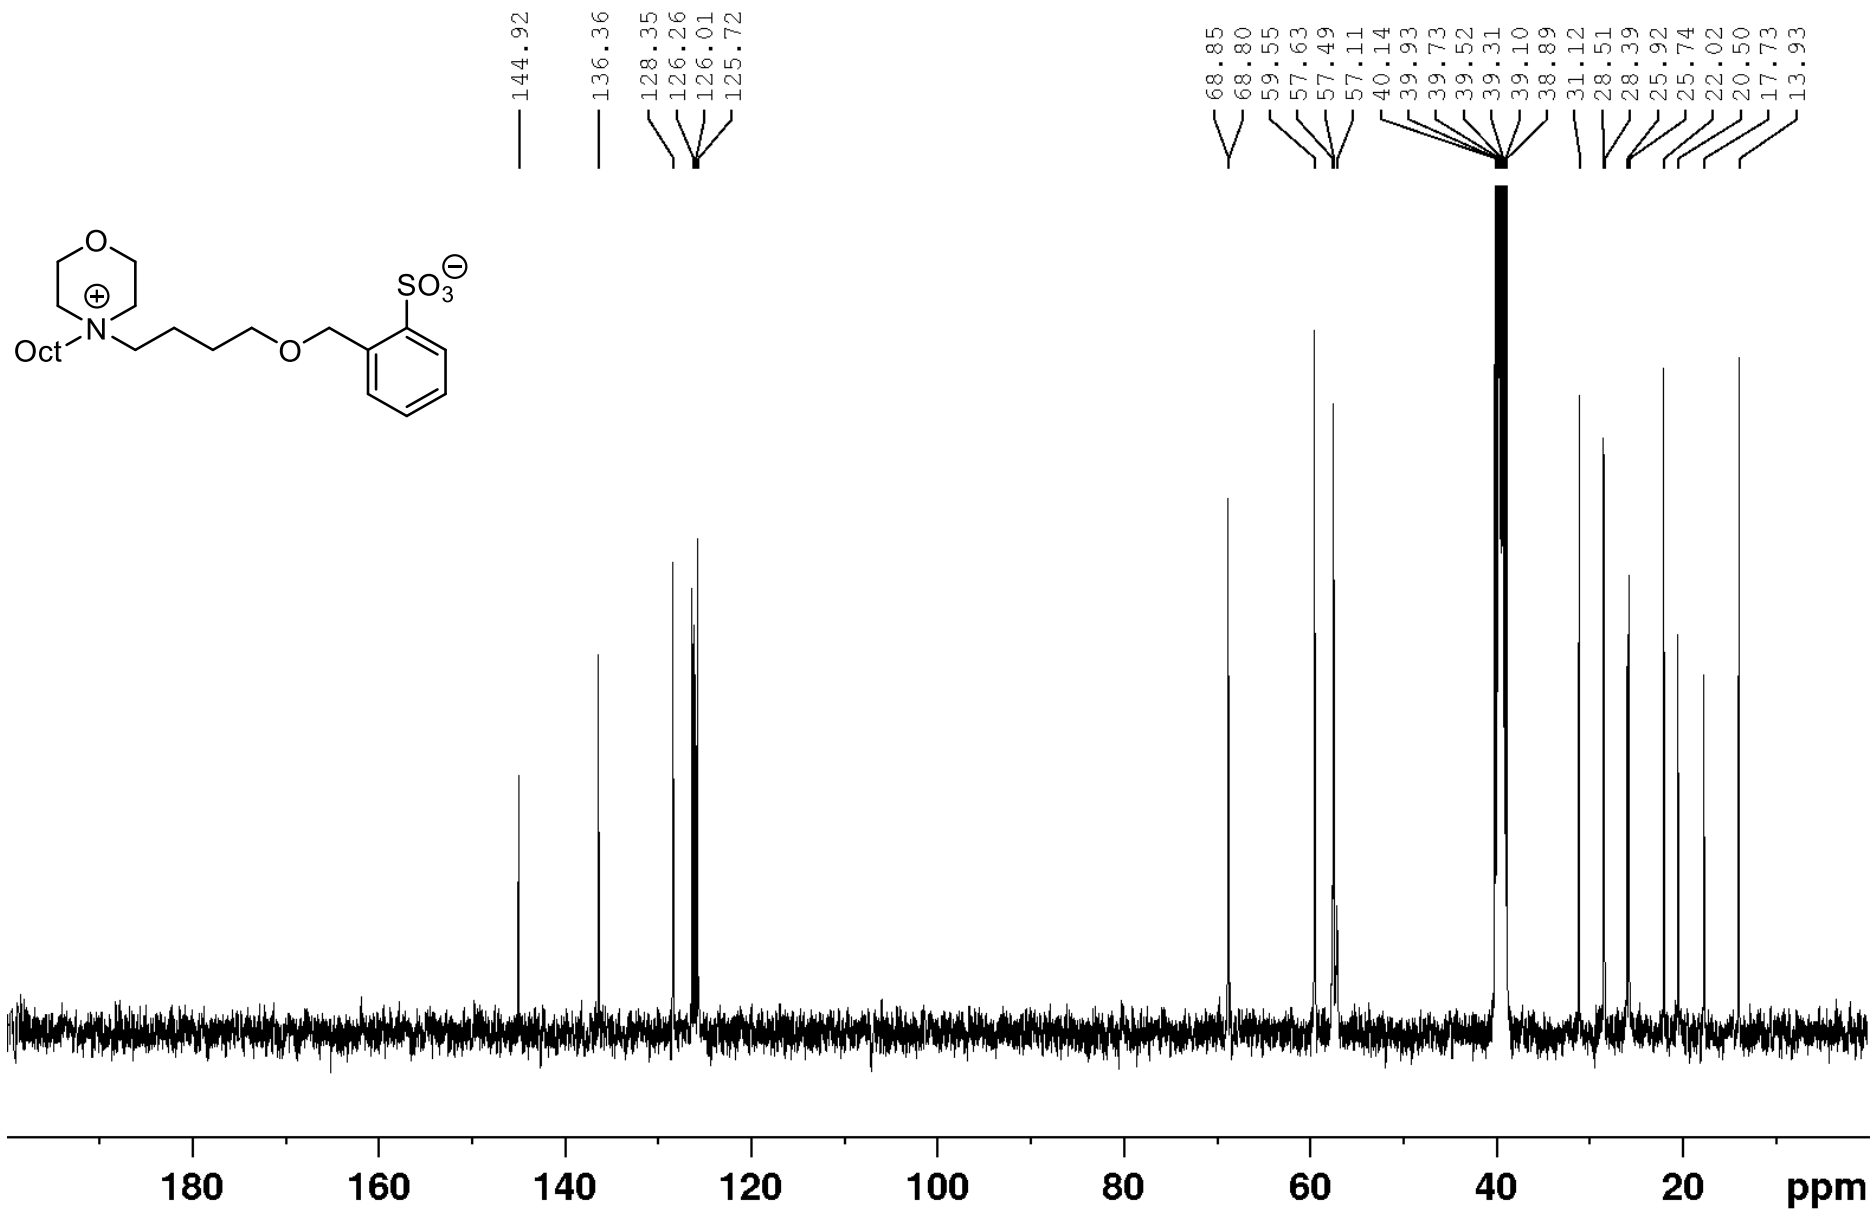

Spectrum

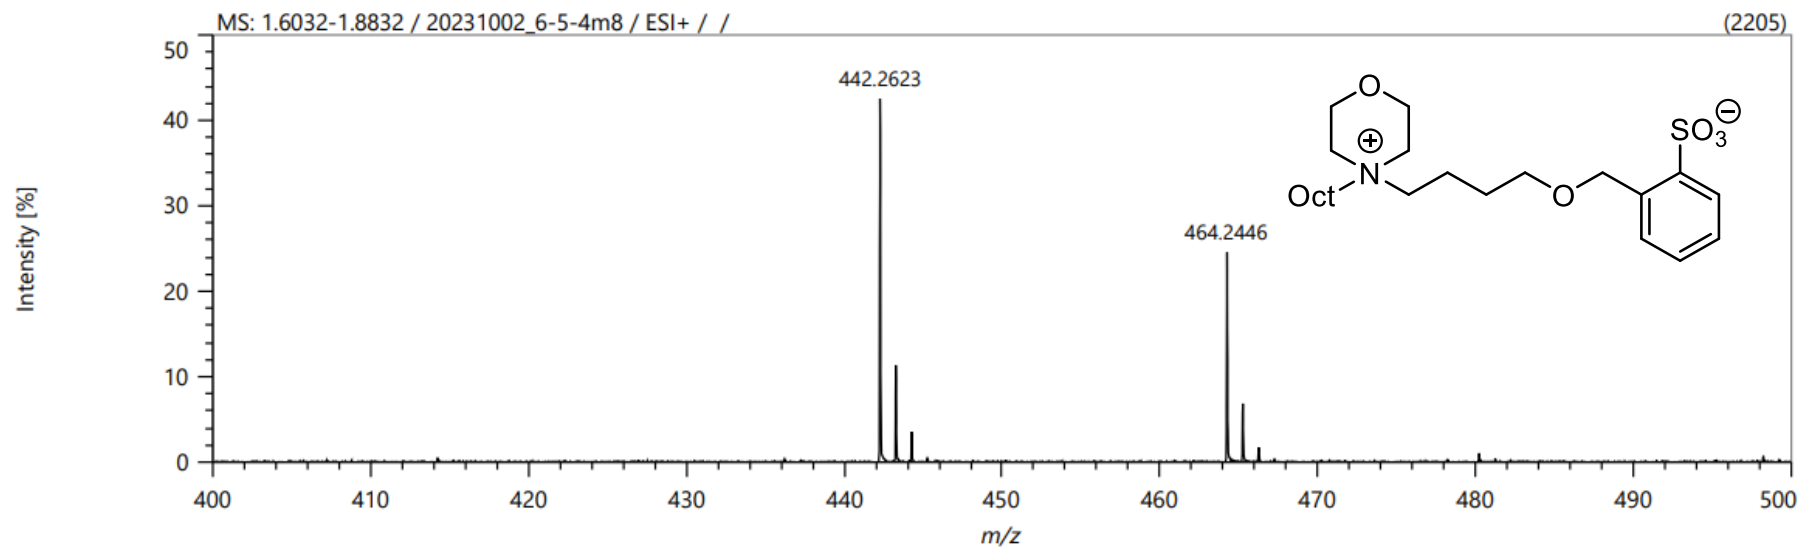

Elemental Composition

Parameters

Tolerance: ±3.00 ppm  
 Electron: Odd/Even  
 Charge: +1  
 DBE: -99.0 - 999.0

Elements Set 2:

| Symbol | C   | H    | N | O | S | Na |
|--------|-----|------|---|---|---|----|
| Min    | 0   | 0    | 1 | 5 | 1 | 0  |
| Max    | 400 | 1000 | 1 | 5 | 1 | 1  |

Results

| Mass      | Formula                                               | Calculated Mass | Mass Difference [mDa] | Mass Difference [ppm] | DBE |
|-----------|-------------------------------------------------------|-----------------|-----------------------|-----------------------|-----|
| 442.26232 | C <sub>23</sub> H <sub>40</sub> N O <sub>5</sub> S    | 442.26217       | 0.15                  | 0.35                  | 4.5 |
| 464.24461 | C <sub>23</sub> H <sub>39</sub> N O <sub>5</sub> Na S | 464.24412       | 0.49                  | 1.06                  | 4.5 |

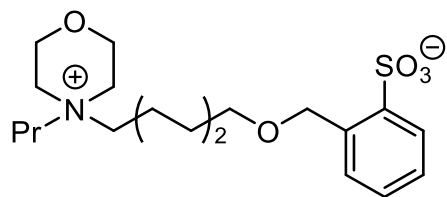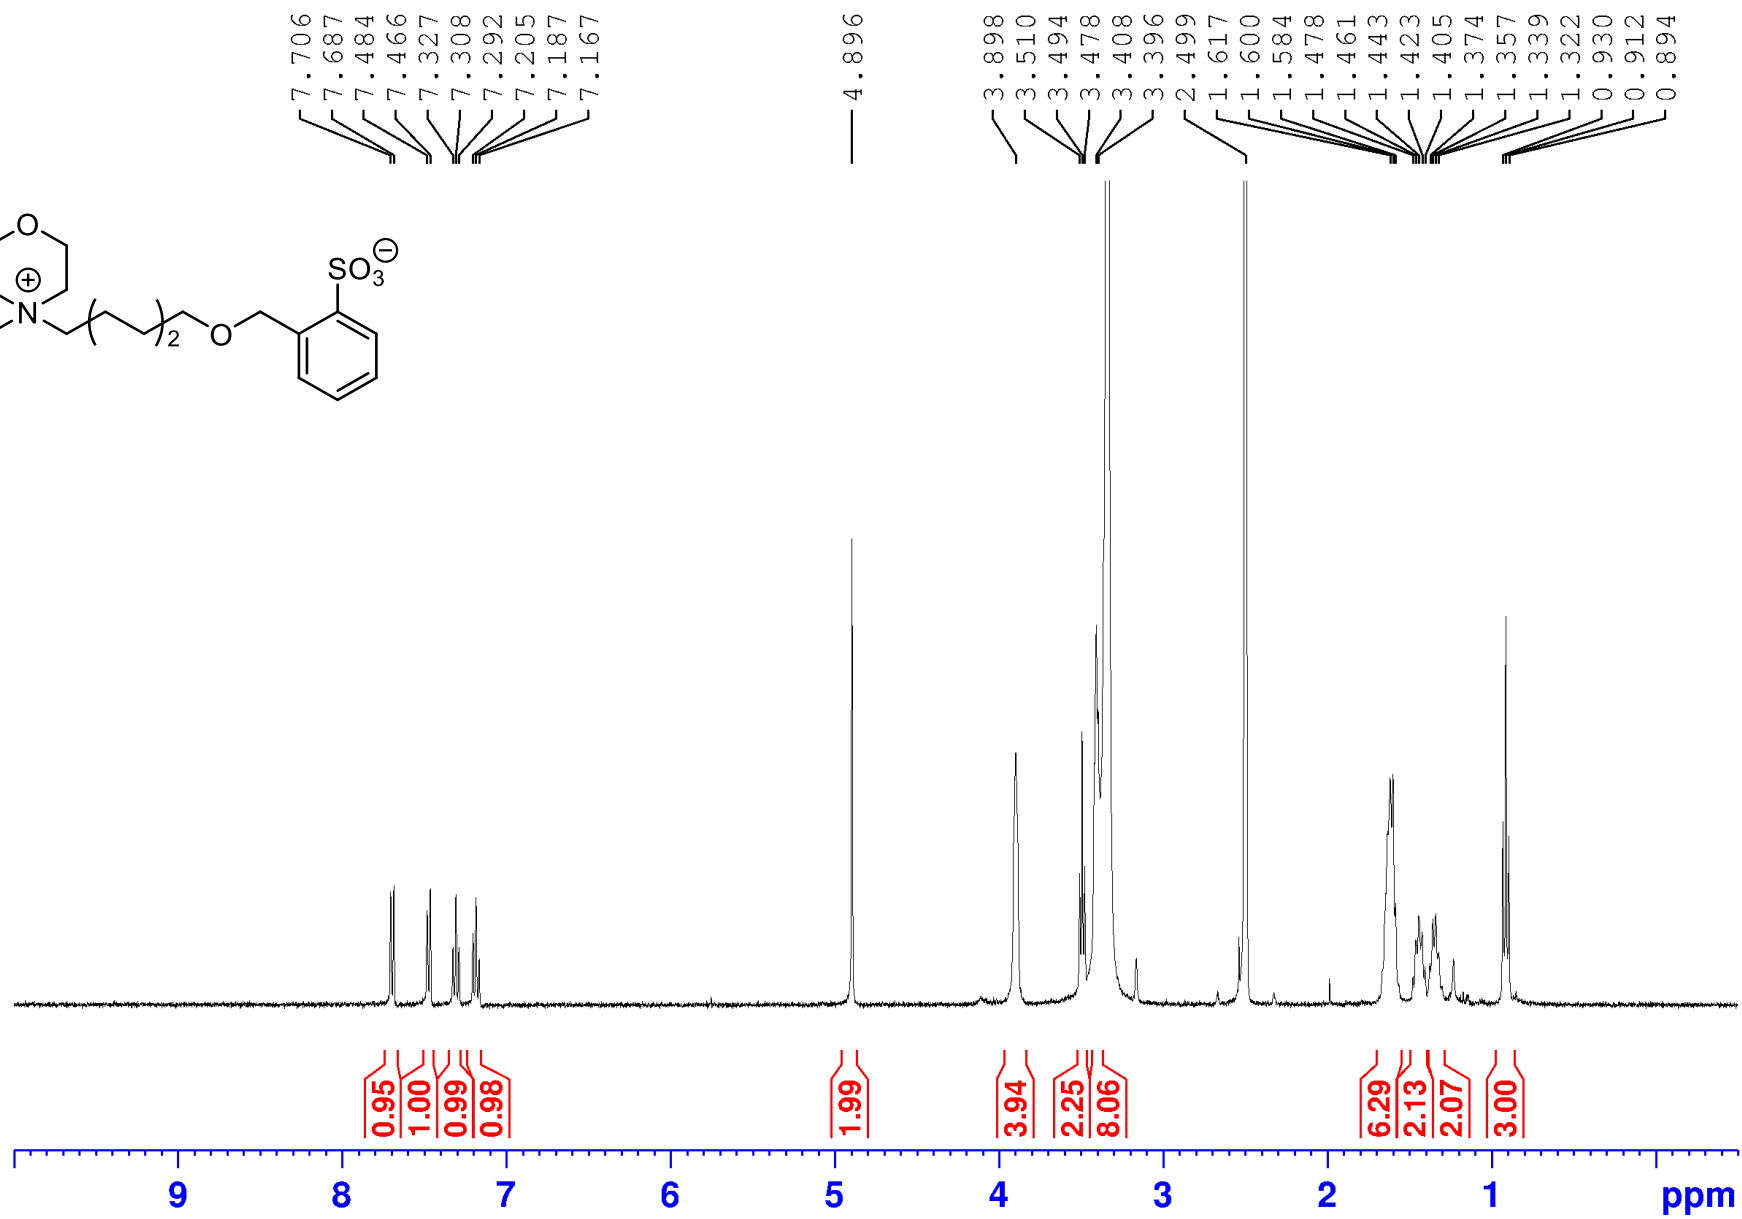

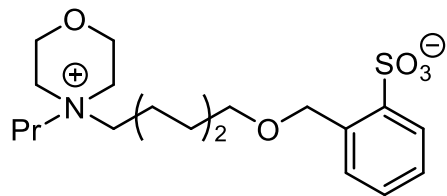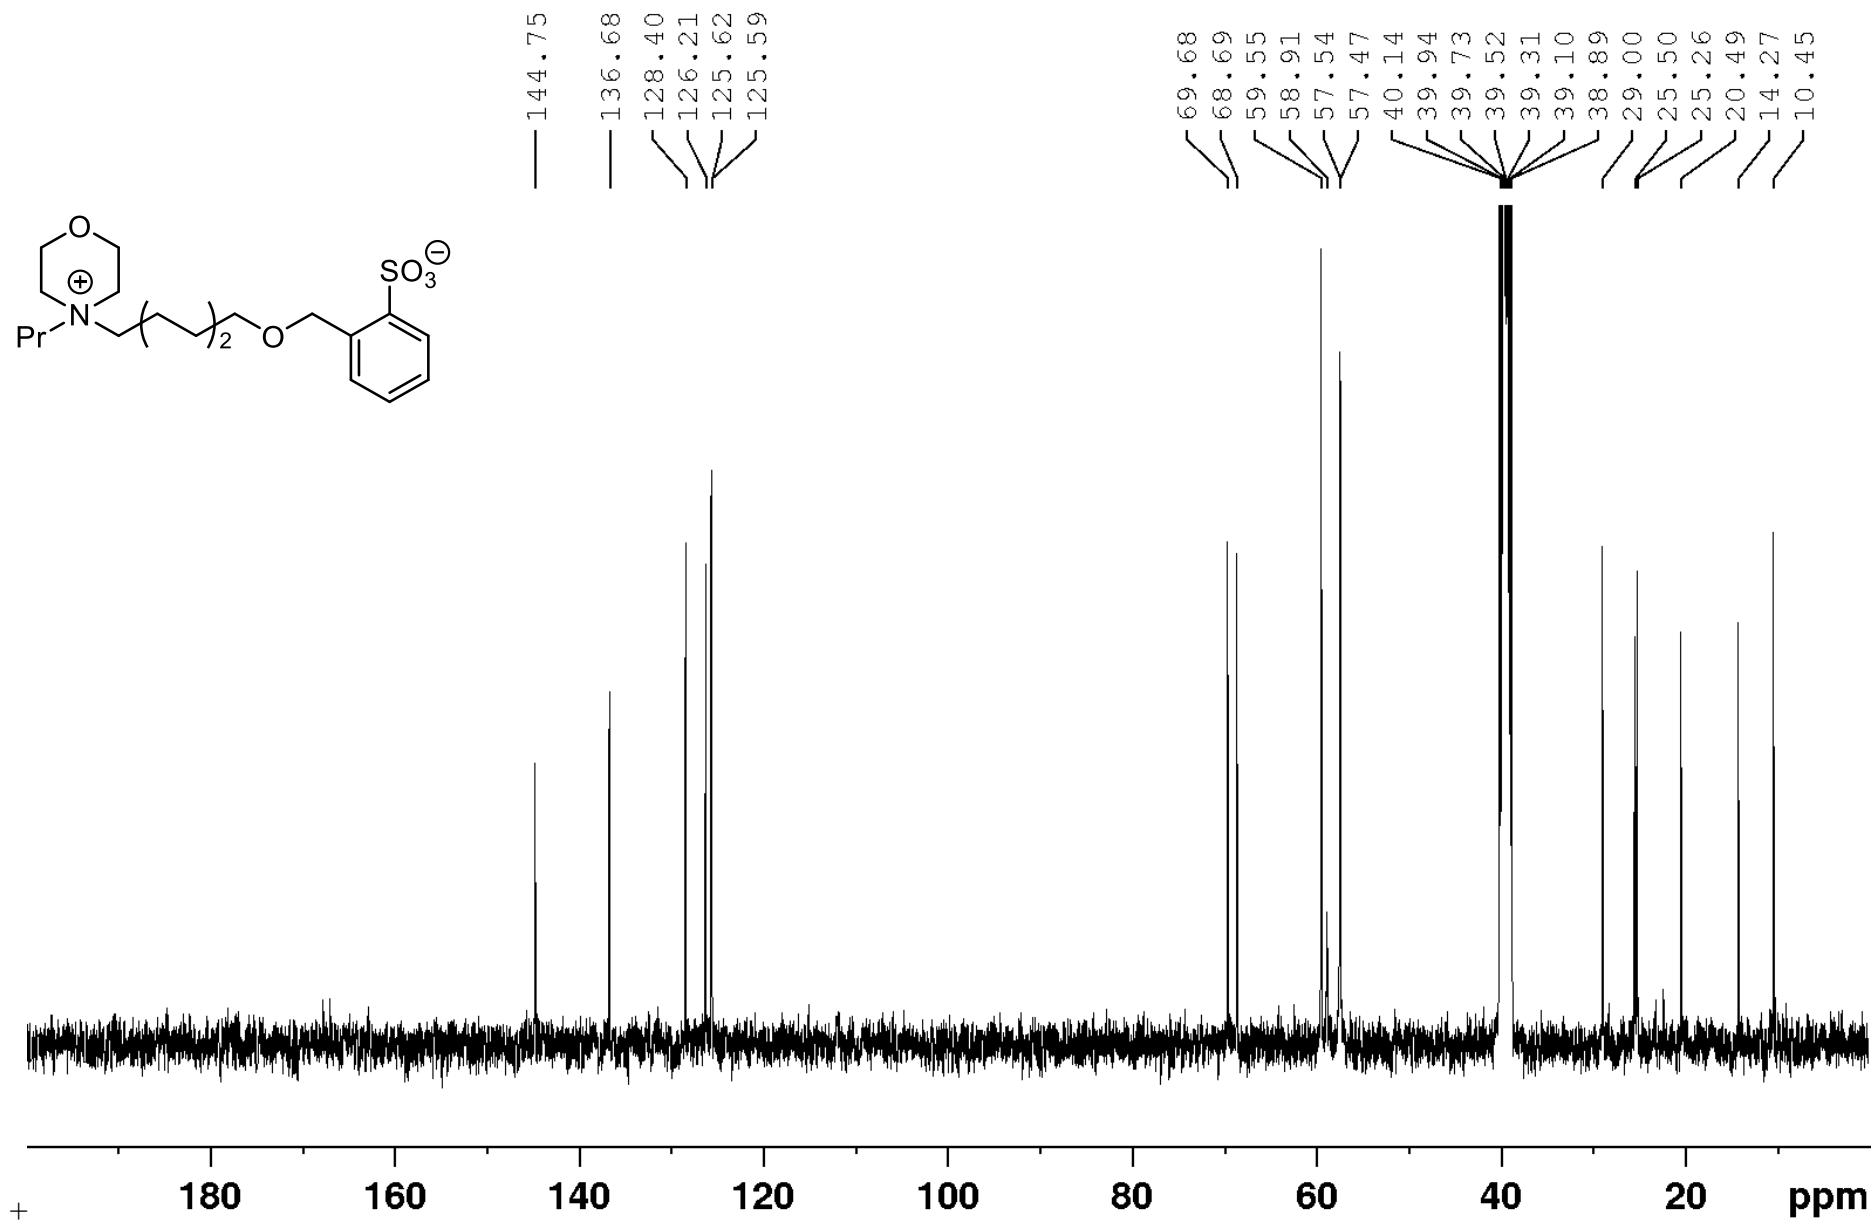

Spectrum

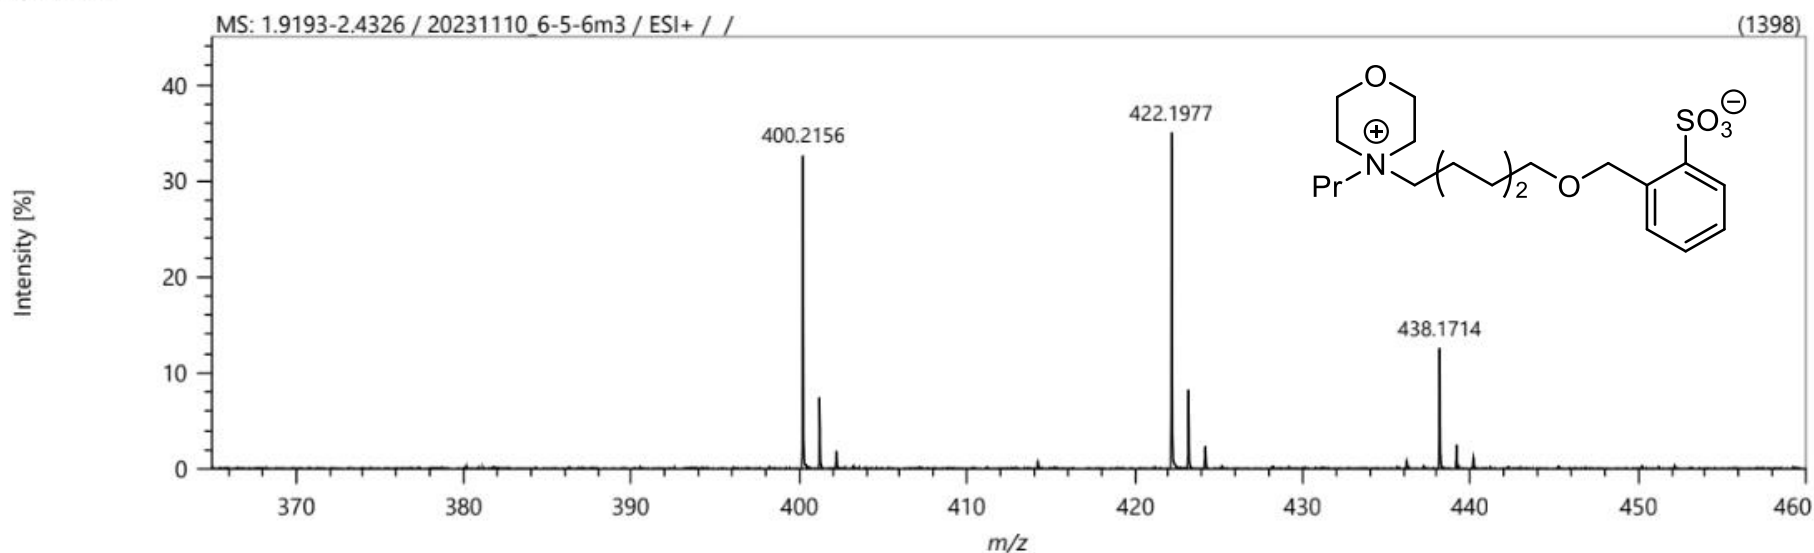

Elemental Composition

Parameters

Tolerance: ±2.00 ppm  
 Electron: Odd/Even  
 Charge: +1  
 DBE: -99.0 - 999.0

Elements Set 2:

| Symbol | C   | H    | O | N | S | Na | K |
|--------|-----|------|---|---|---|----|---|
| Min    | 0   | 0    | 5 | 1 | 1 | 0  | 0 |
| Max    | 400 | 1000 | 5 | 1 | 1 | 1  | 1 |

Results

| Mass      | Formula                                               | Calculated Mass | Mass Difference [mDa] | Mass Difference [ppm] | DBE |
|-----------|-------------------------------------------------------|-----------------|-----------------------|-----------------------|-----|
| 400.21559 | C <sub>20</sub> H <sub>34</sub> N O <sub>5</sub> S    | 400.21522       | 0.37                  | 0.92                  | 4.5 |
| 422.19774 | C <sub>20</sub> H <sub>33</sub> N O <sub>5</sub> Na S | 422.19716       | 0.58                  | 1.37                  | 4.5 |
| 438.17141 | C <sub>20</sub> H <sub>33</sub> N O <sub>5</sub> S K  | 438.17110       | 0.31                  | 0.70                  | 4.5 |



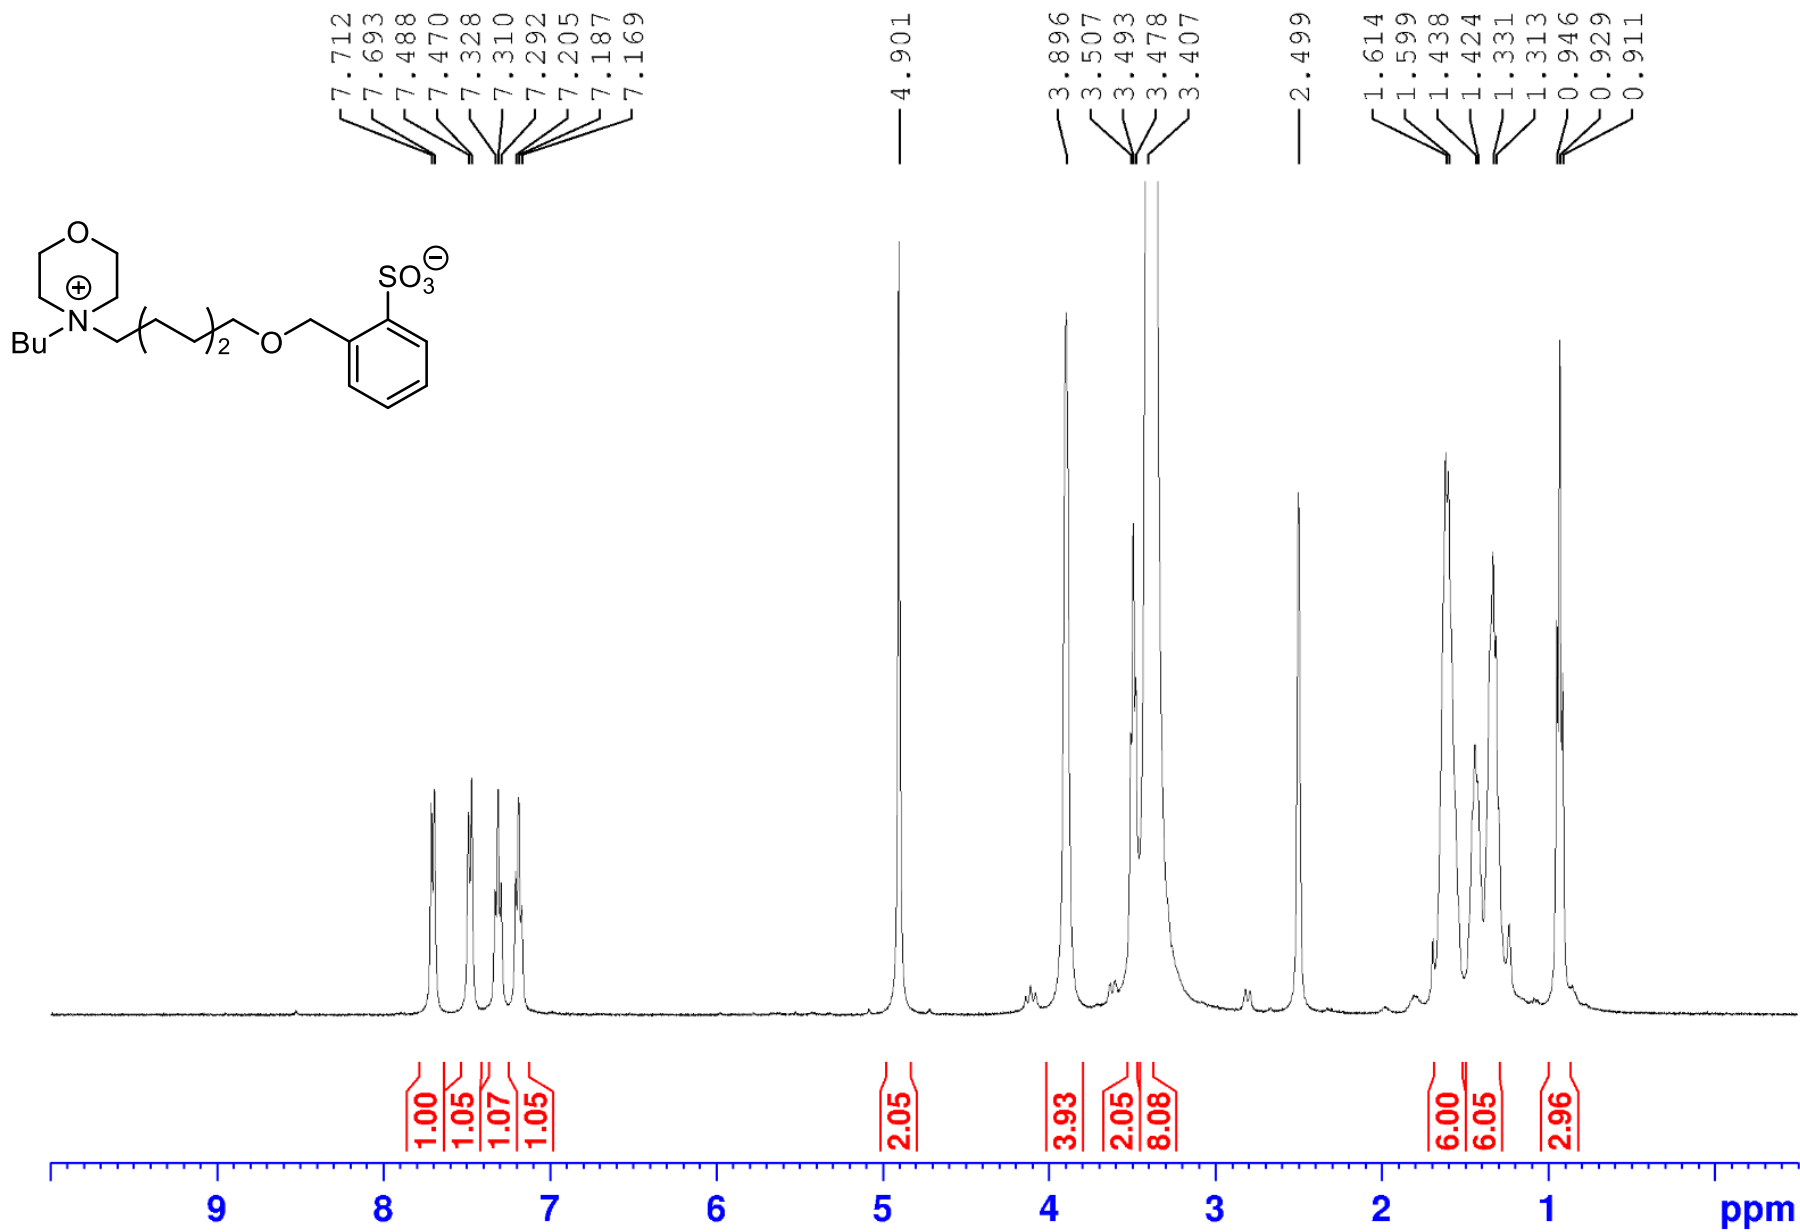

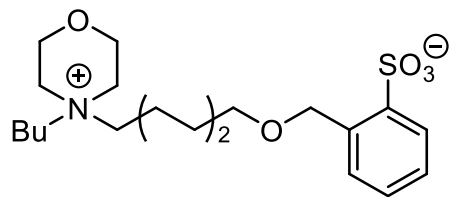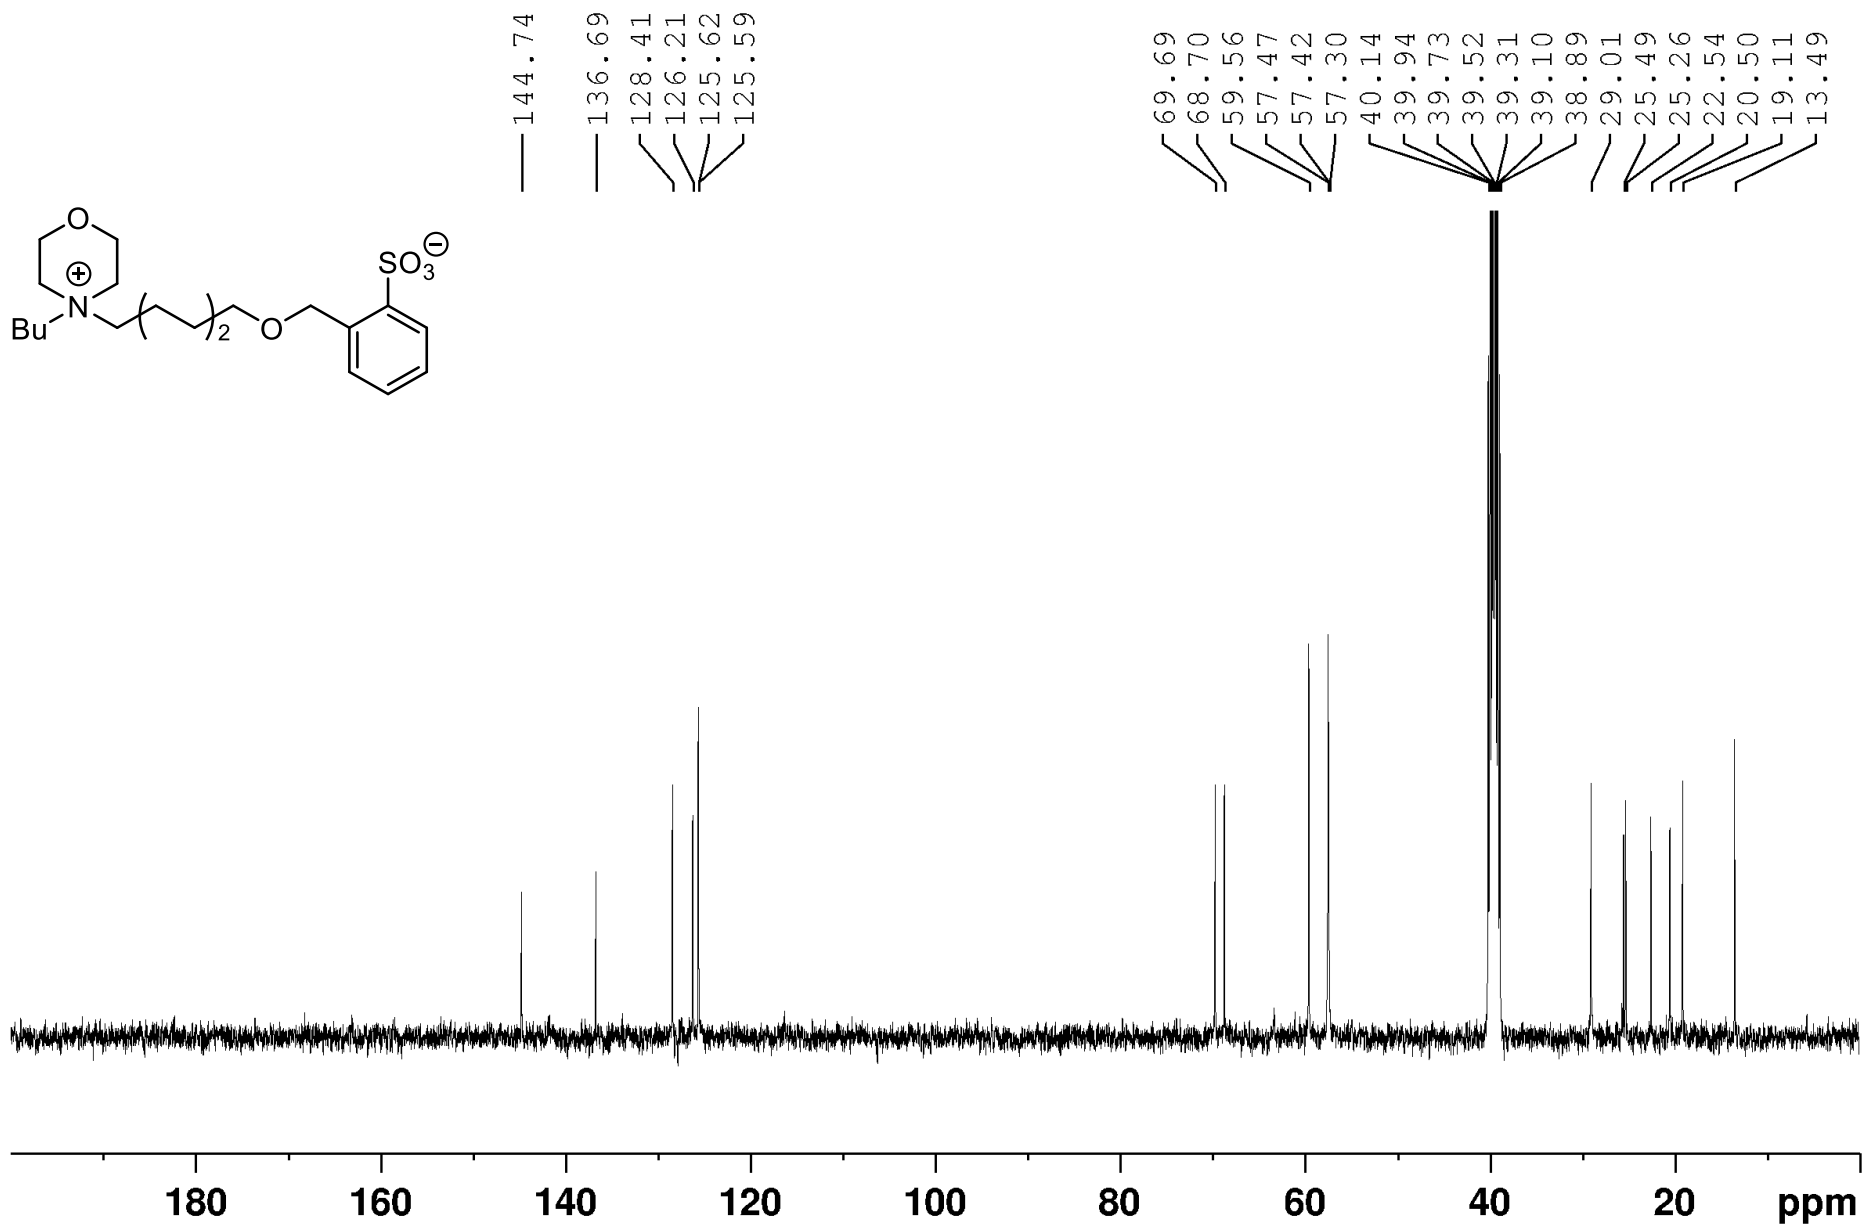

## Spectrum

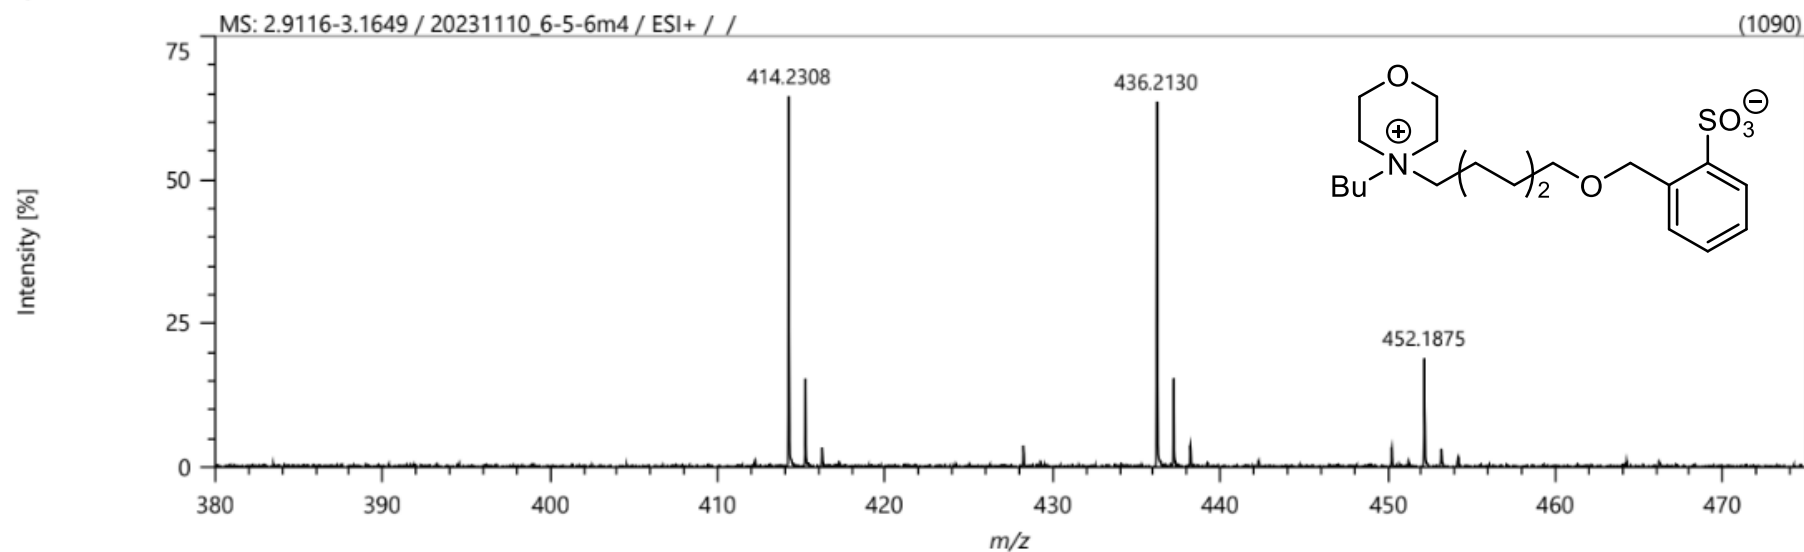

## Elemental Composition

## Parameters

Tolerance:  $\pm 2.00$  ppm  
 Electron: Odd/Even  
 Charge: +1  
 DBE: -99.0 - 999.0

## Elements Set 2:

| Symbol | C   | H    | O | N | S | Na | K |
|--------|-----|------|---|---|---|----|---|
| Min    | 0   | 0    | 5 | 1 | 1 | 0  | 0 |
| Max    | 400 | 1000 | 5 | 1 | 1 | 1  | 1 |

## Results

| Mass      | Formula                                               | Calculated Mass | Mass Difference [mDa] | Mass Difference [ppm] | DBE |
|-----------|-------------------------------------------------------|-----------------|-----------------------|-----------------------|-----|
| 414.23079 | C <sub>21</sub> H <sub>36</sub> N O <sub>5</sub> S    | 414.23087       | -0.08                 | -0.20                 | 4.5 |
| 436.21299 | C <sub>21</sub> H <sub>35</sub> N O <sub>5</sub> Na S | 436.21282       | 0.17                  | 0.40                  | 4.5 |
| 452.18747 | C <sub>21</sub> H <sub>35</sub> N O <sub>5</sub> S K  | 452.18675       | 0.72                  | 1.59                  | 4.5 |

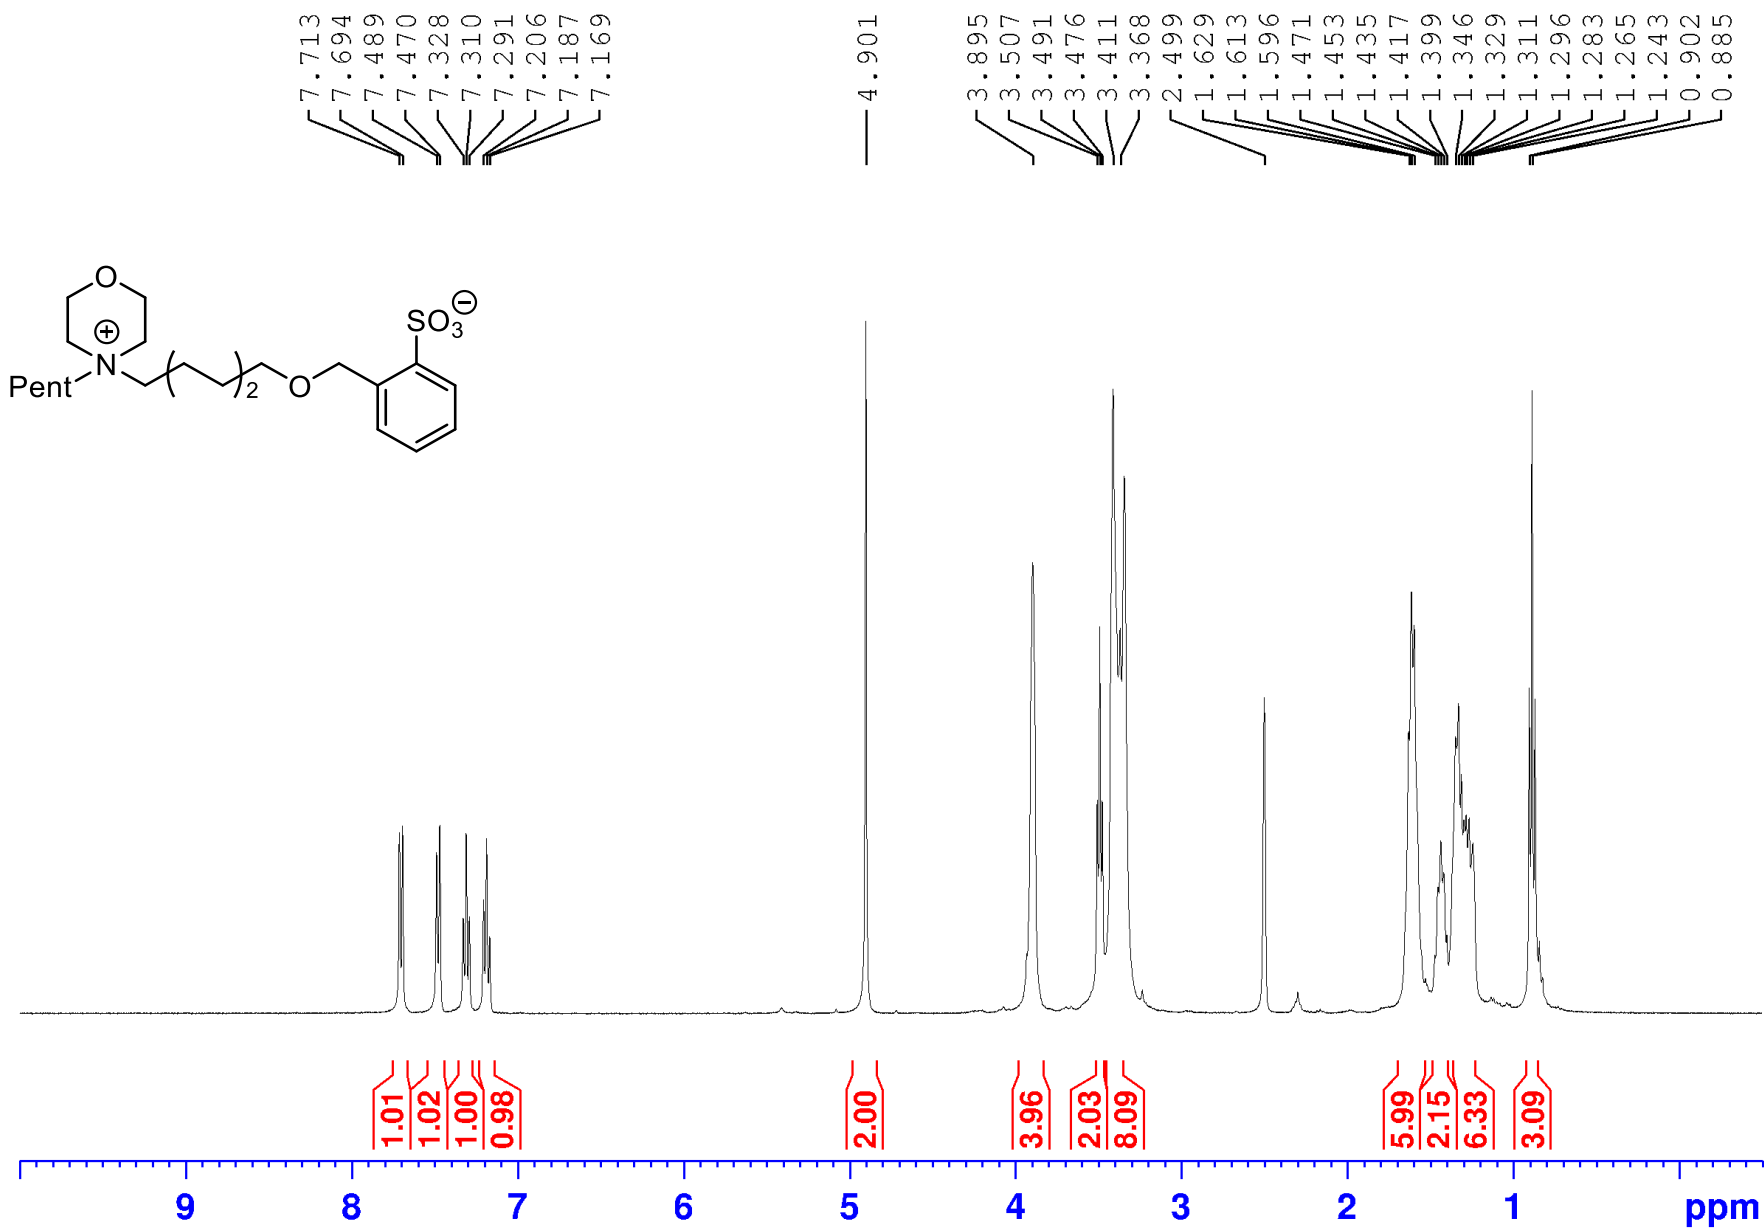

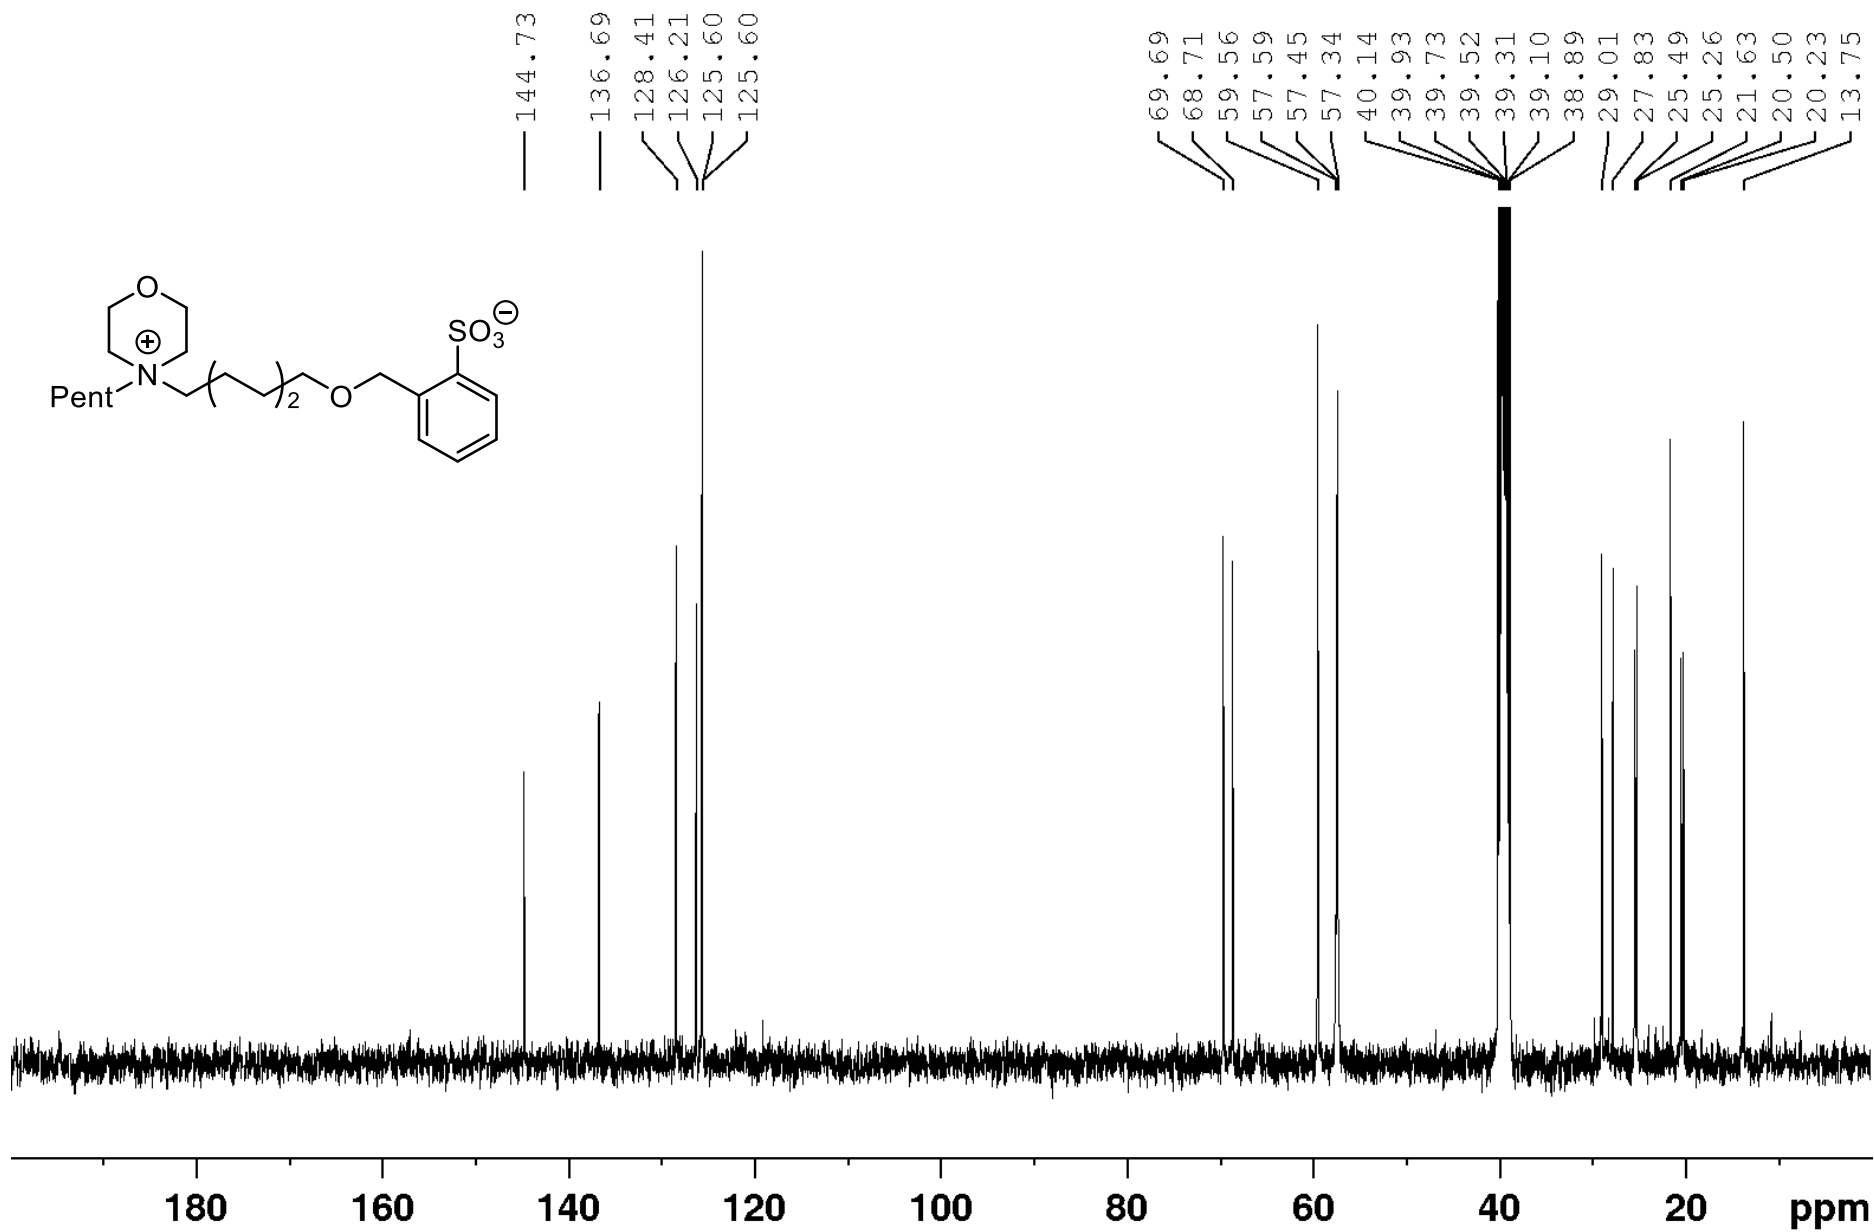

Spectrum

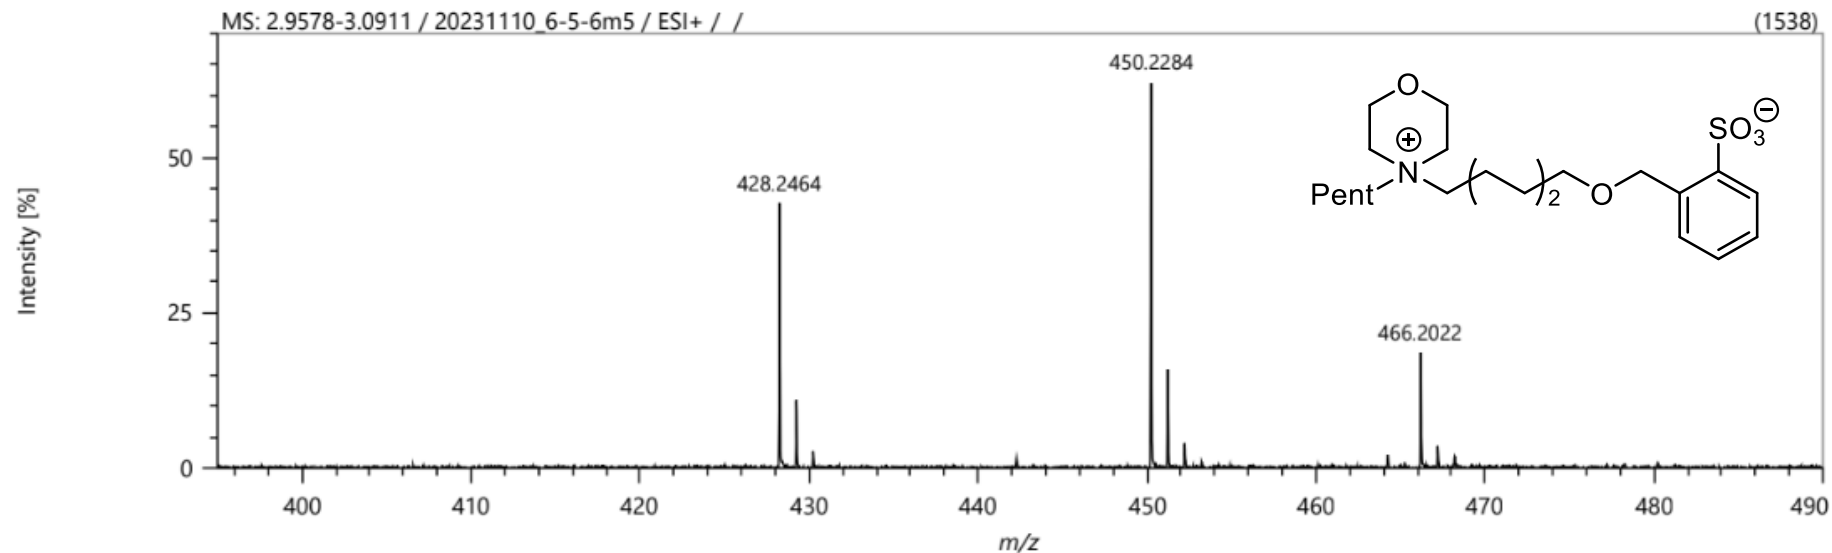

Elemental Composition

Parameters

Tolerance: ±2.00 ppm  
 Electron: Odd/Even  
 Charge: +1  
 DBE: -99.0 - 999.0

Elements Set 2:

| Symbol | C   | H    | O | N | S | Na | K |
|--------|-----|------|---|---|---|----|---|
| Min    | 0   | 0    | 5 | 1 | 1 | 0  | 0 |
| Max    | 400 | 1000 | 5 | 1 | 1 | 1  | 1 |

Results

| Mass      | Formula                                               | Calculated Mass | Mass Difference [mDa] | Mass Difference [ppm] | DBE |
|-----------|-------------------------------------------------------|-----------------|-----------------------|-----------------------|-----|
| 428.24638 | C <sub>22</sub> H <sub>38</sub> N O <sub>5</sub> S    | 428.24652       | -0.14                 | -0.32                 | 4.5 |
| 450.22842 | C <sub>22</sub> H <sub>37</sub> N O <sub>5</sub> Na S | 450.22847       | -0.05                 | -0.10                 | 4.5 |
| 466.20221 | C <sub>22</sub> H <sub>37</sub> N O <sub>5</sub> S K  | 466.20240       | -0.19                 | -0.40                 | 4.5 |

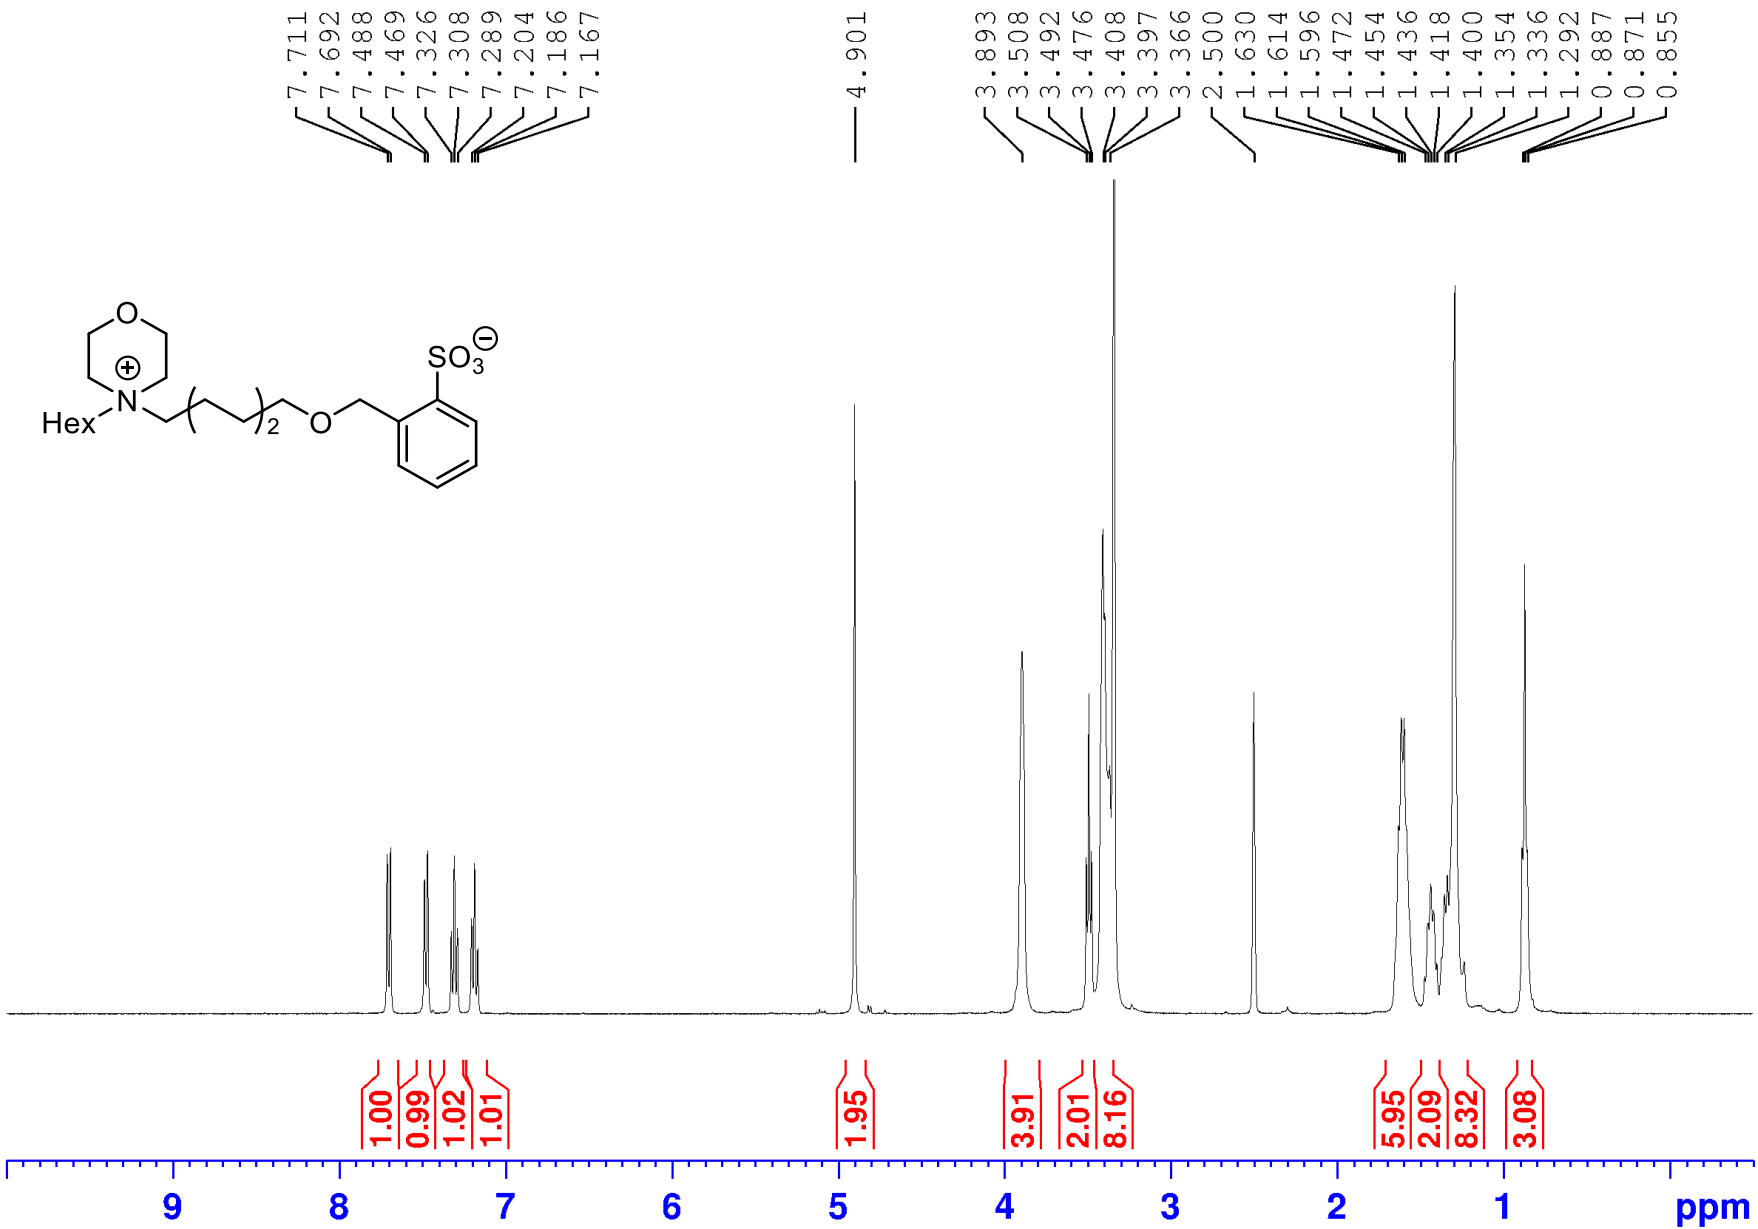

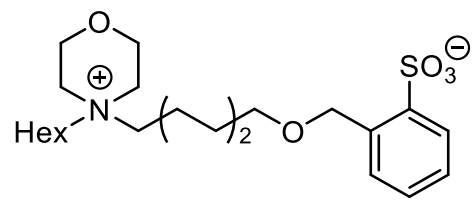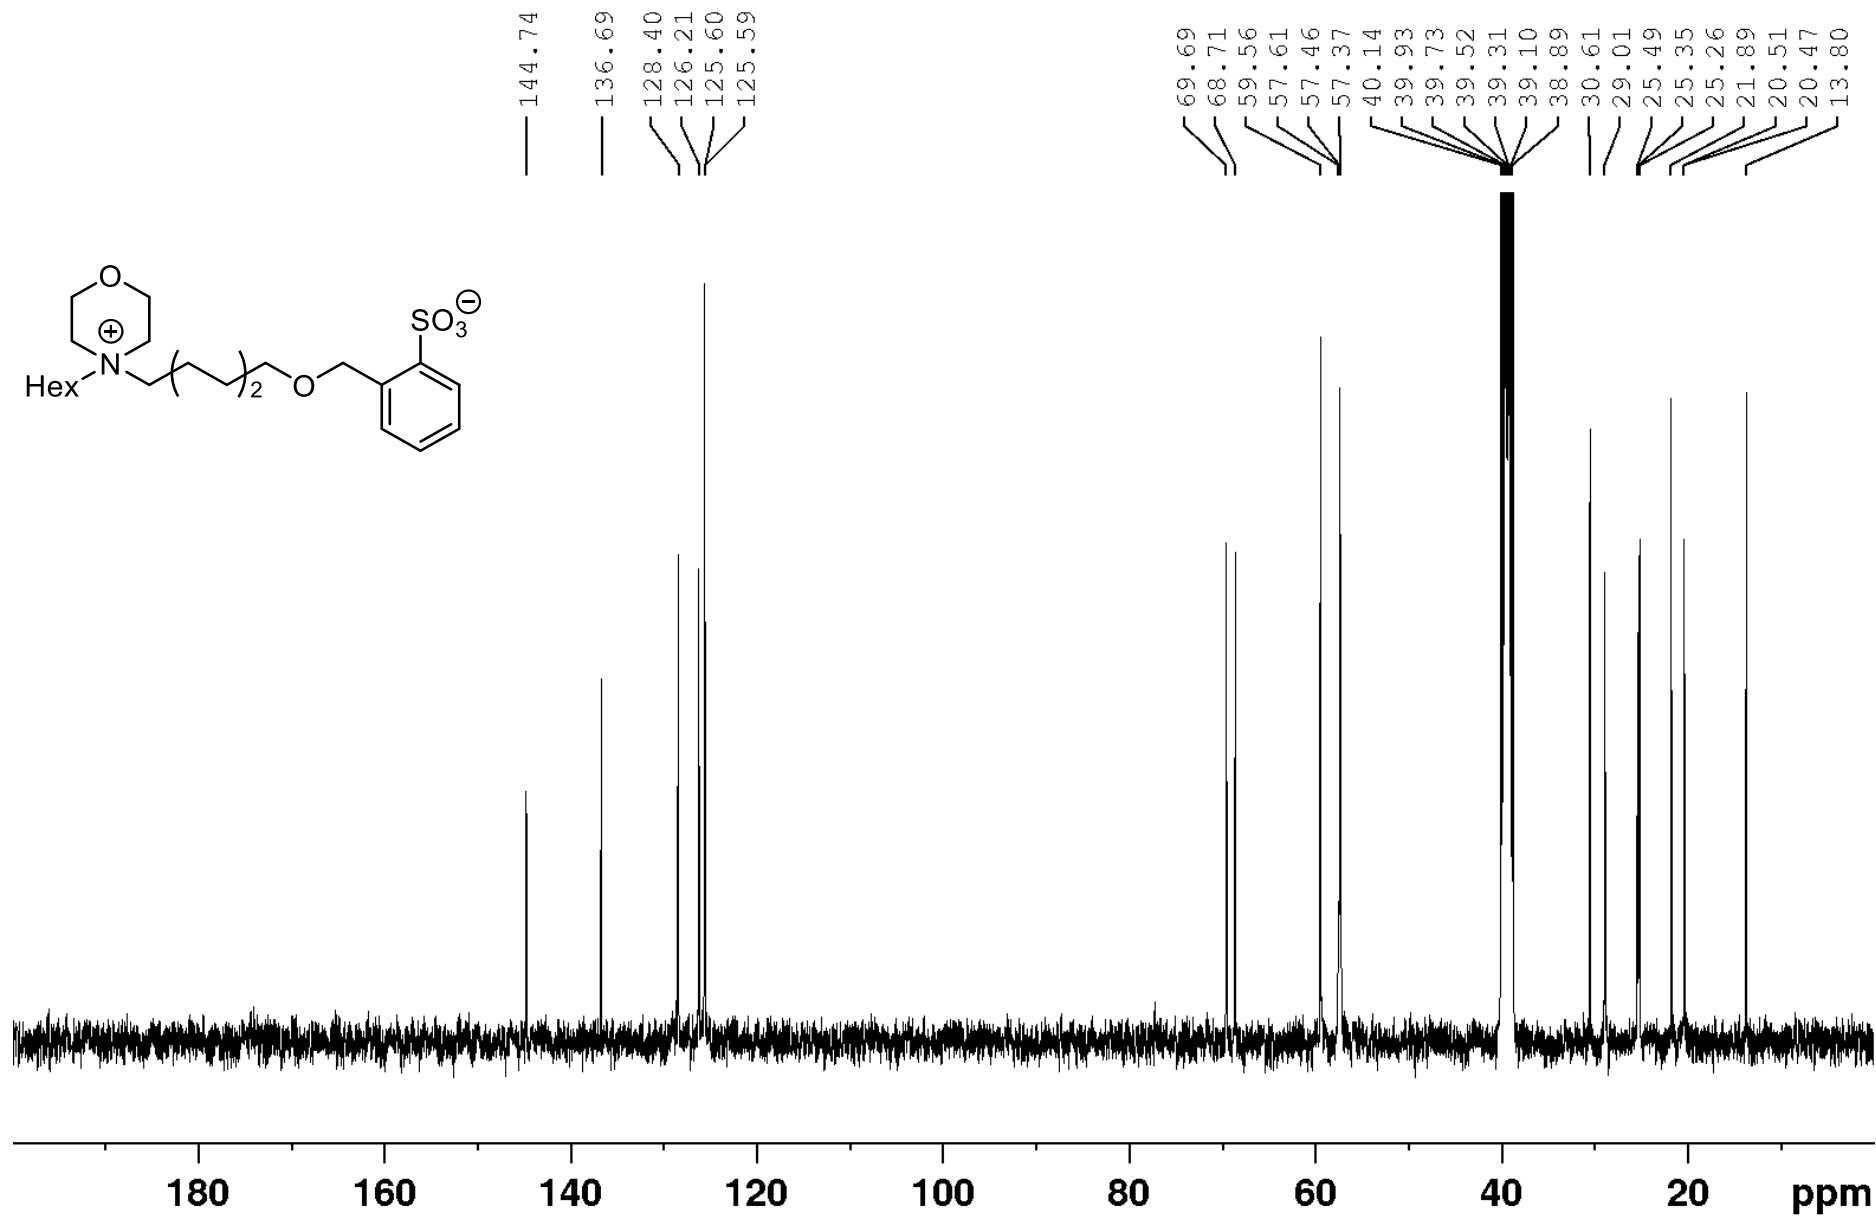



Spectrum

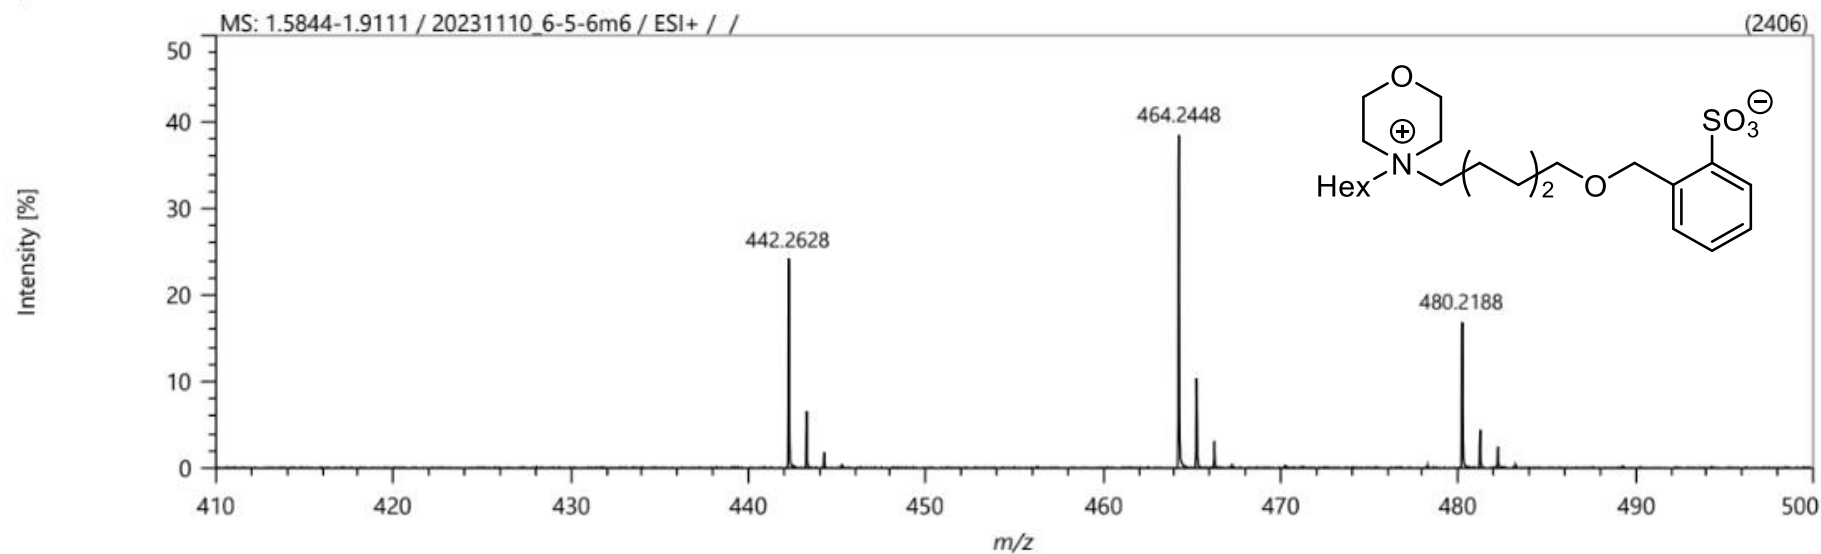

Elemental Composition

Parameters

Tolerance:  $\pm 2.00$  ppm  
 Electron: Odd/Even  
 Charge: +1  
 DBE: -99.0 - 999.0

Elements Set 2:

| Symbol | C   | H    | O | N | S | Na | K |
|--------|-----|------|---|---|---|----|---|
| Min    | 0   | 0    | 5 | 1 | 1 | 0  | 0 |
| Max    | 400 | 1000 | 5 | 1 | 1 | 1  | 1 |

Results

| Mass      | Formula                                               | Calculated Mass | Mass Difference [mDa] | Mass Difference [ppm] | DBE |
|-----------|-------------------------------------------------------|-----------------|-----------------------|-----------------------|-----|
| 442.26278 | C <sub>23</sub> H <sub>40</sub> N O <sub>5</sub> S    | 442.26217       | 0.61                  | 1.38                  | 4.5 |
| 464.24478 | C <sub>23</sub> H <sub>39</sub> N O <sub>5</sub> Na S | 464.24412       | 0.67                  | 1.44                  | 4.5 |
| 480.21876 | C <sub>23</sub> H <sub>39</sub> N O <sub>5</sub> S K  | 480.21805       | 0.70                  | 1.47                  | 4.5 |

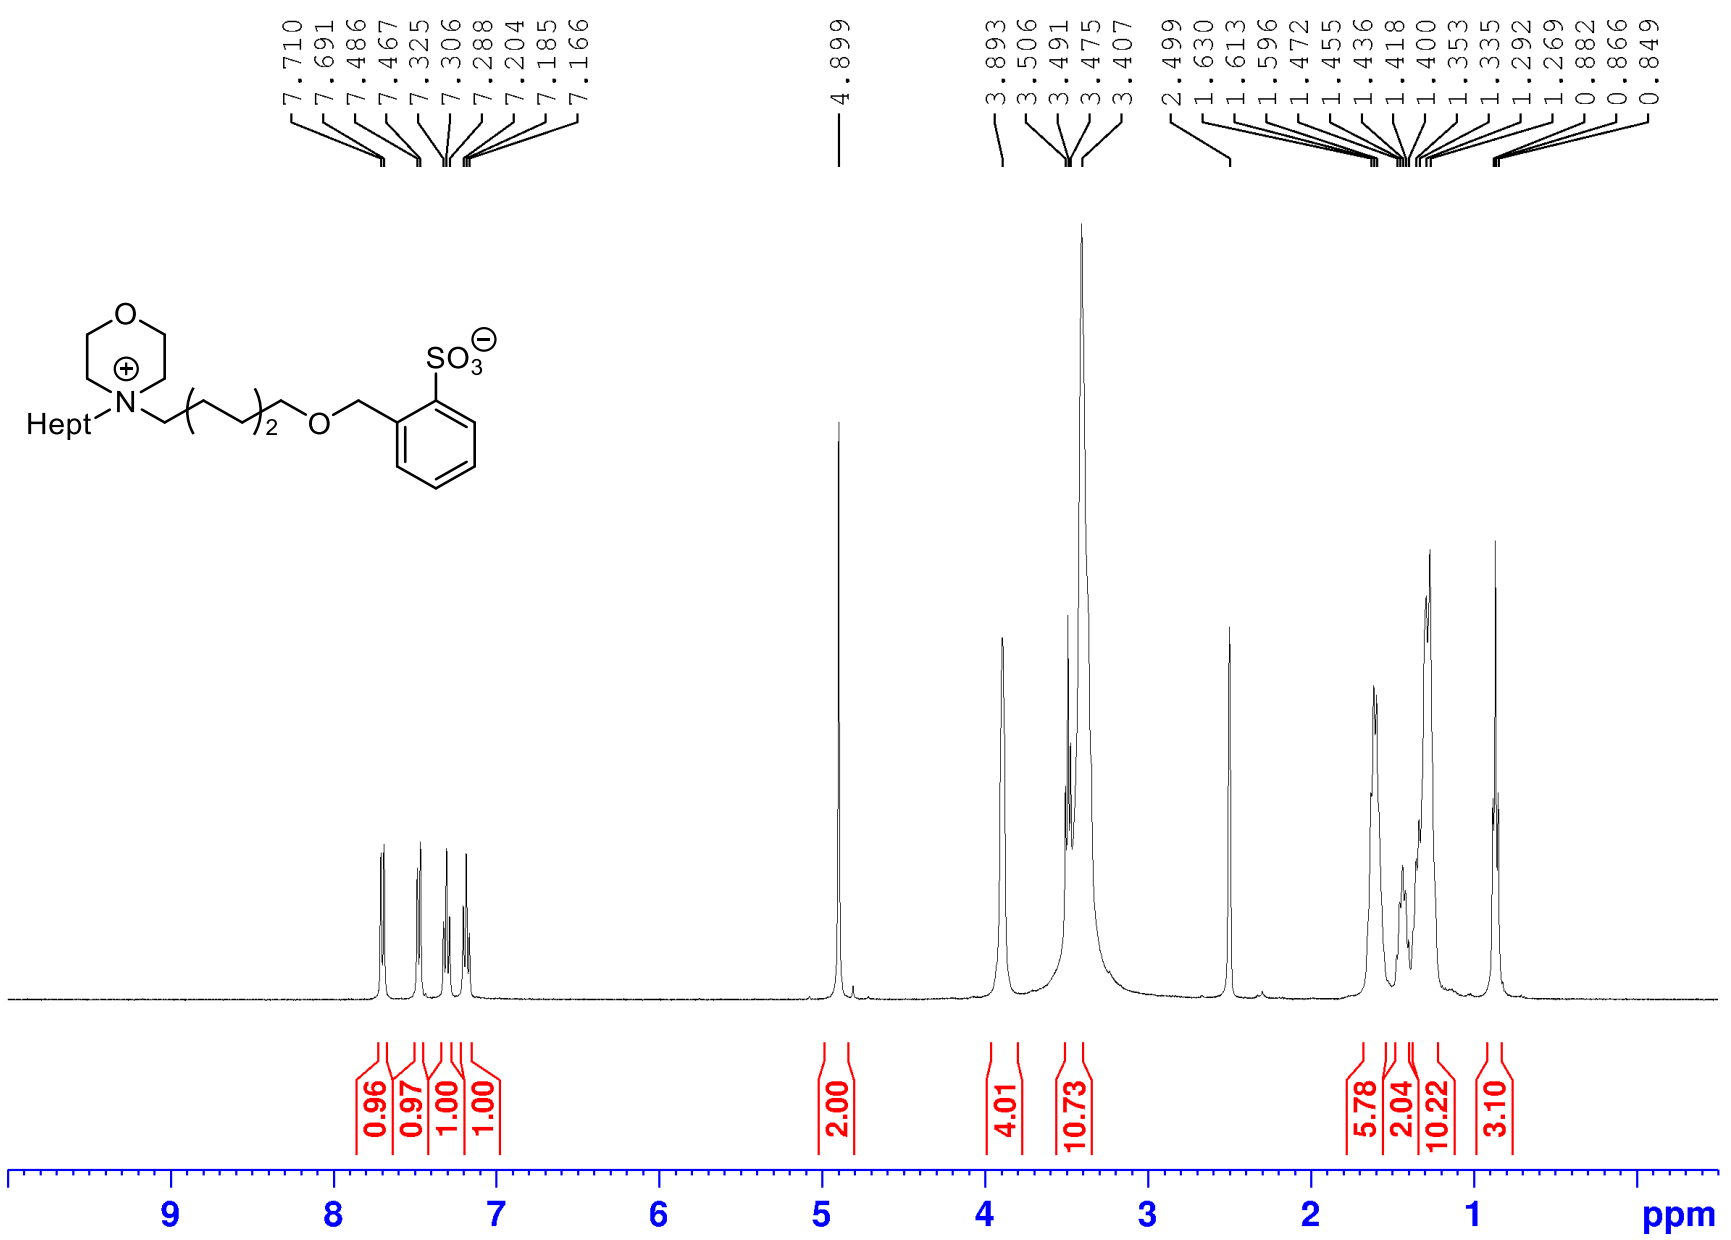

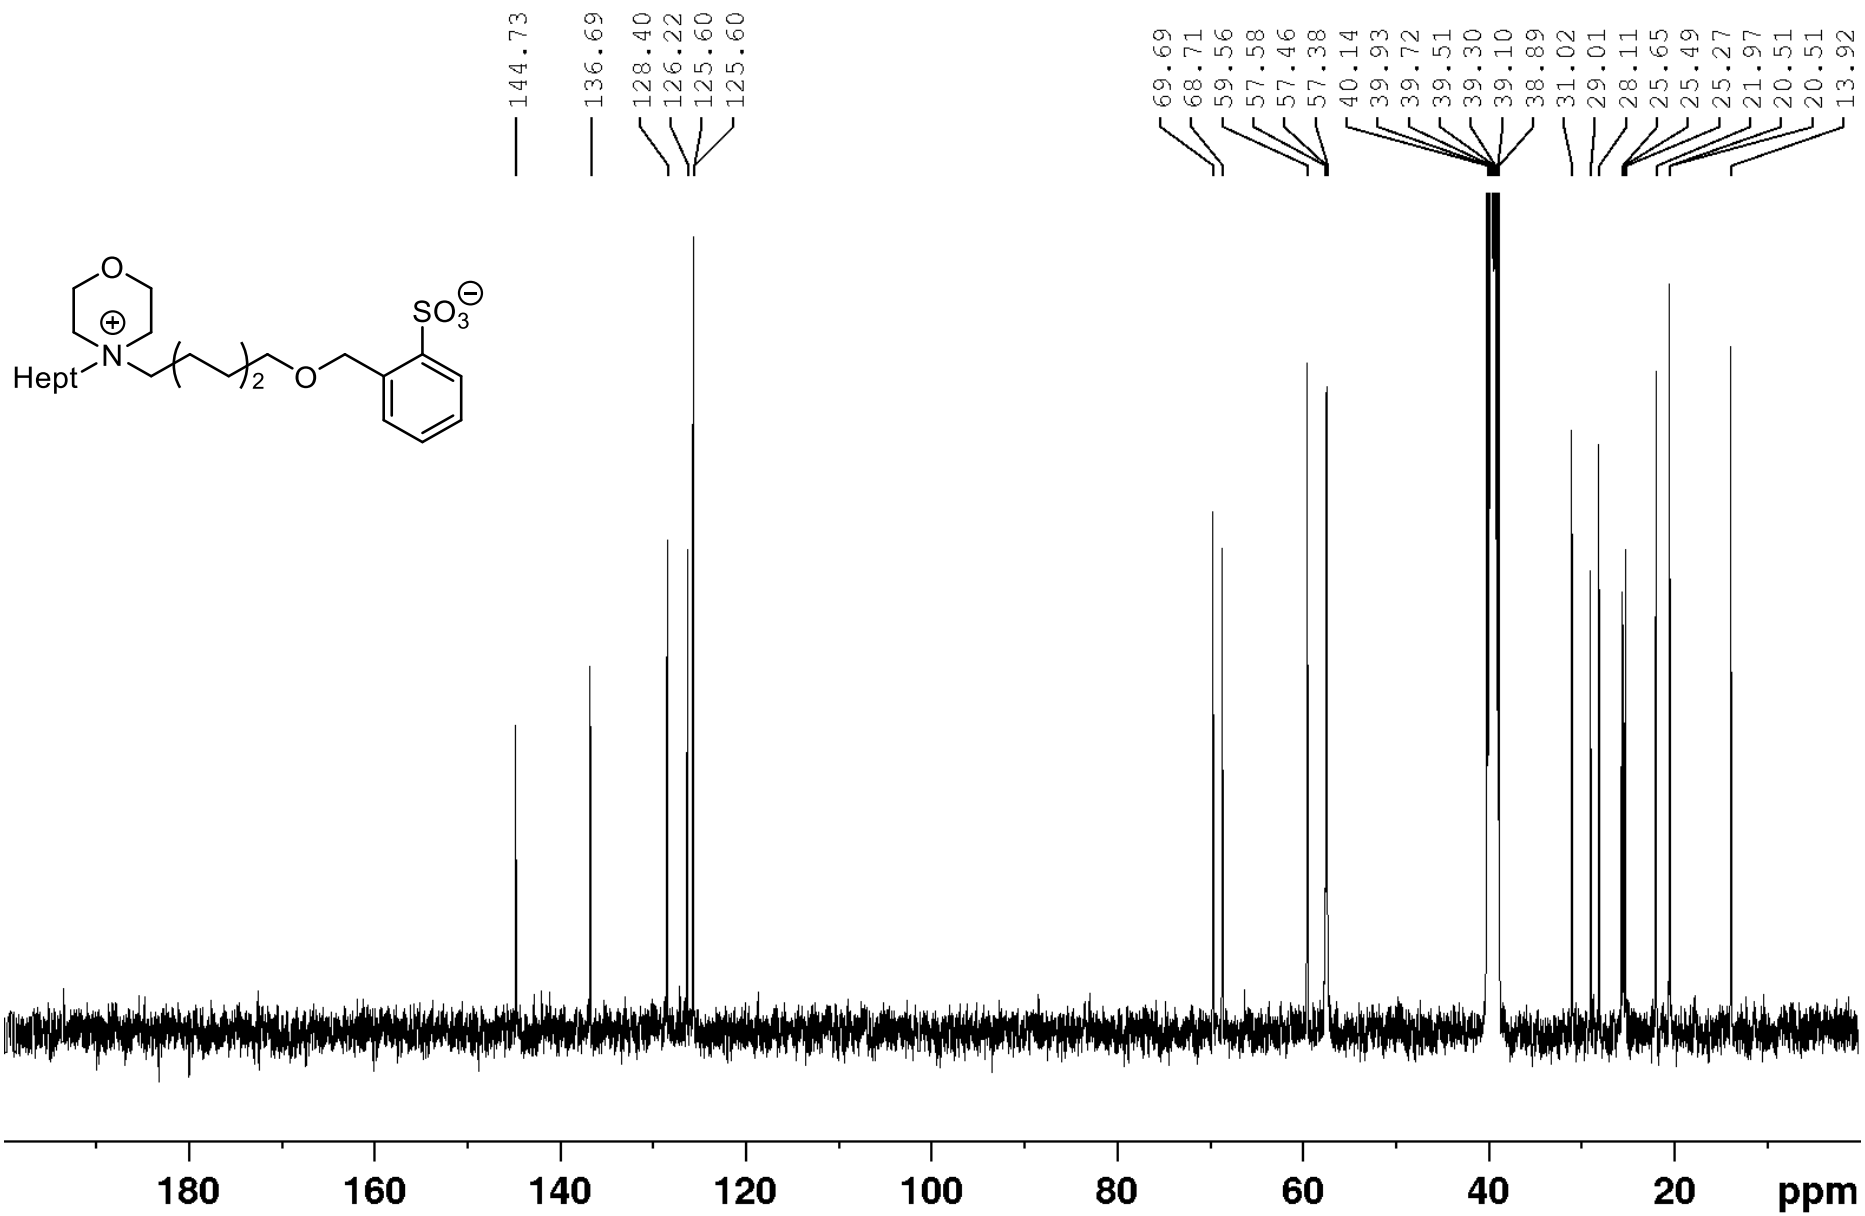

Spectrum

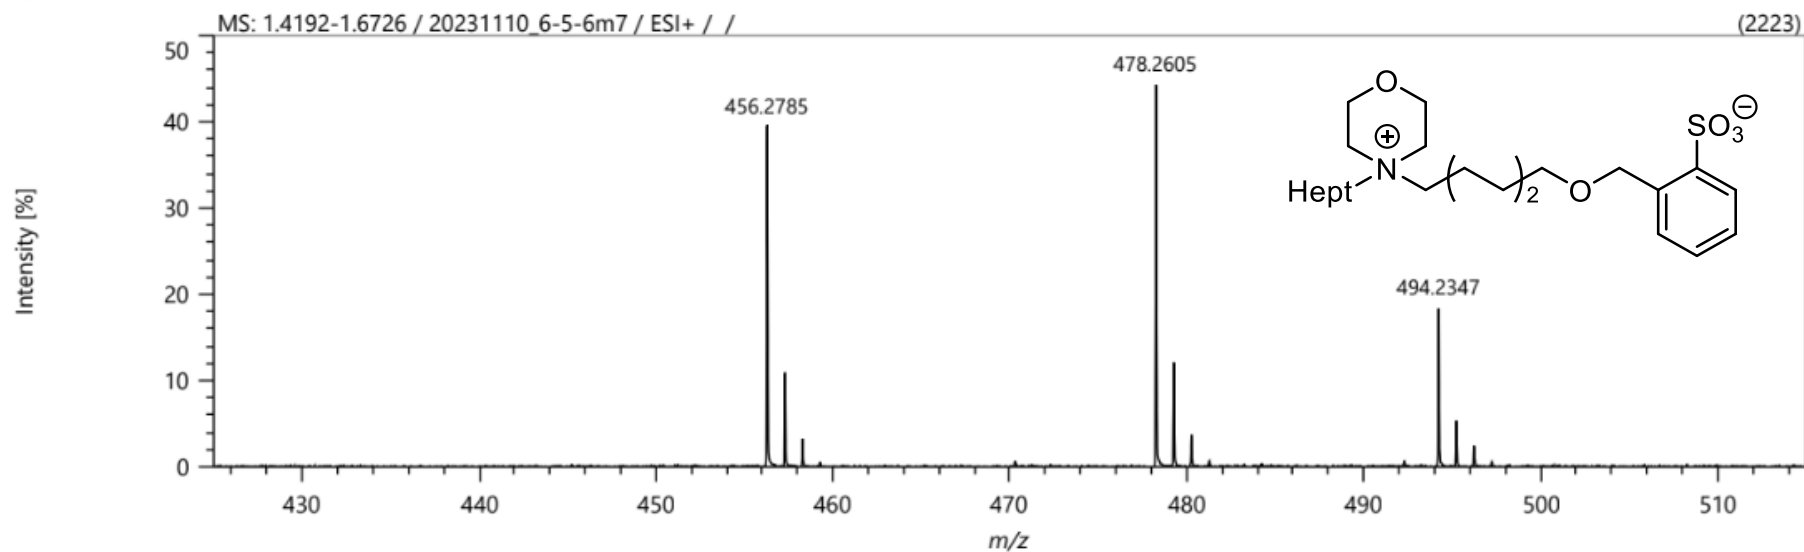

Elemental Composition

Parameters

Tolerance: ±2.00 ppm  
 Electron: Odd/Even  
 Charge: +1  
 DBE: -99.0 - 999.0

Elements Set 2:

| Symbol | C   | H    | O | N | S | Na | K |
|--------|-----|------|---|---|---|----|---|
| Min    | 0   | 0    | 5 | 1 | 1 | 0  | 0 |
| Max    | 400 | 1000 | 5 | 1 | 1 | 1  | 1 |

Results

| Mass      | Formula                                               | Calculated Mass | Mass Difference [mDa] | Mass Difference [ppm] | DBE |
|-----------|-------------------------------------------------------|-----------------|-----------------------|-----------------------|-----|
| 456.27855 | C <sub>24</sub> H <sub>42</sub> N O <sub>5</sub> S    | 456.27782       | 0.73                  | 1.60                  | 4.5 |
| 478.26047 | C <sub>24</sub> H <sub>41</sub> N O <sub>5</sub> Na S | 478.25977       | 0.71                  | 1.48                  | 4.5 |
| 494.23468 | C <sub>24</sub> H <sub>41</sub> N O <sub>5</sub> S K  | 494.23370       | 0.98                  | 1.97                  | 4.5 |

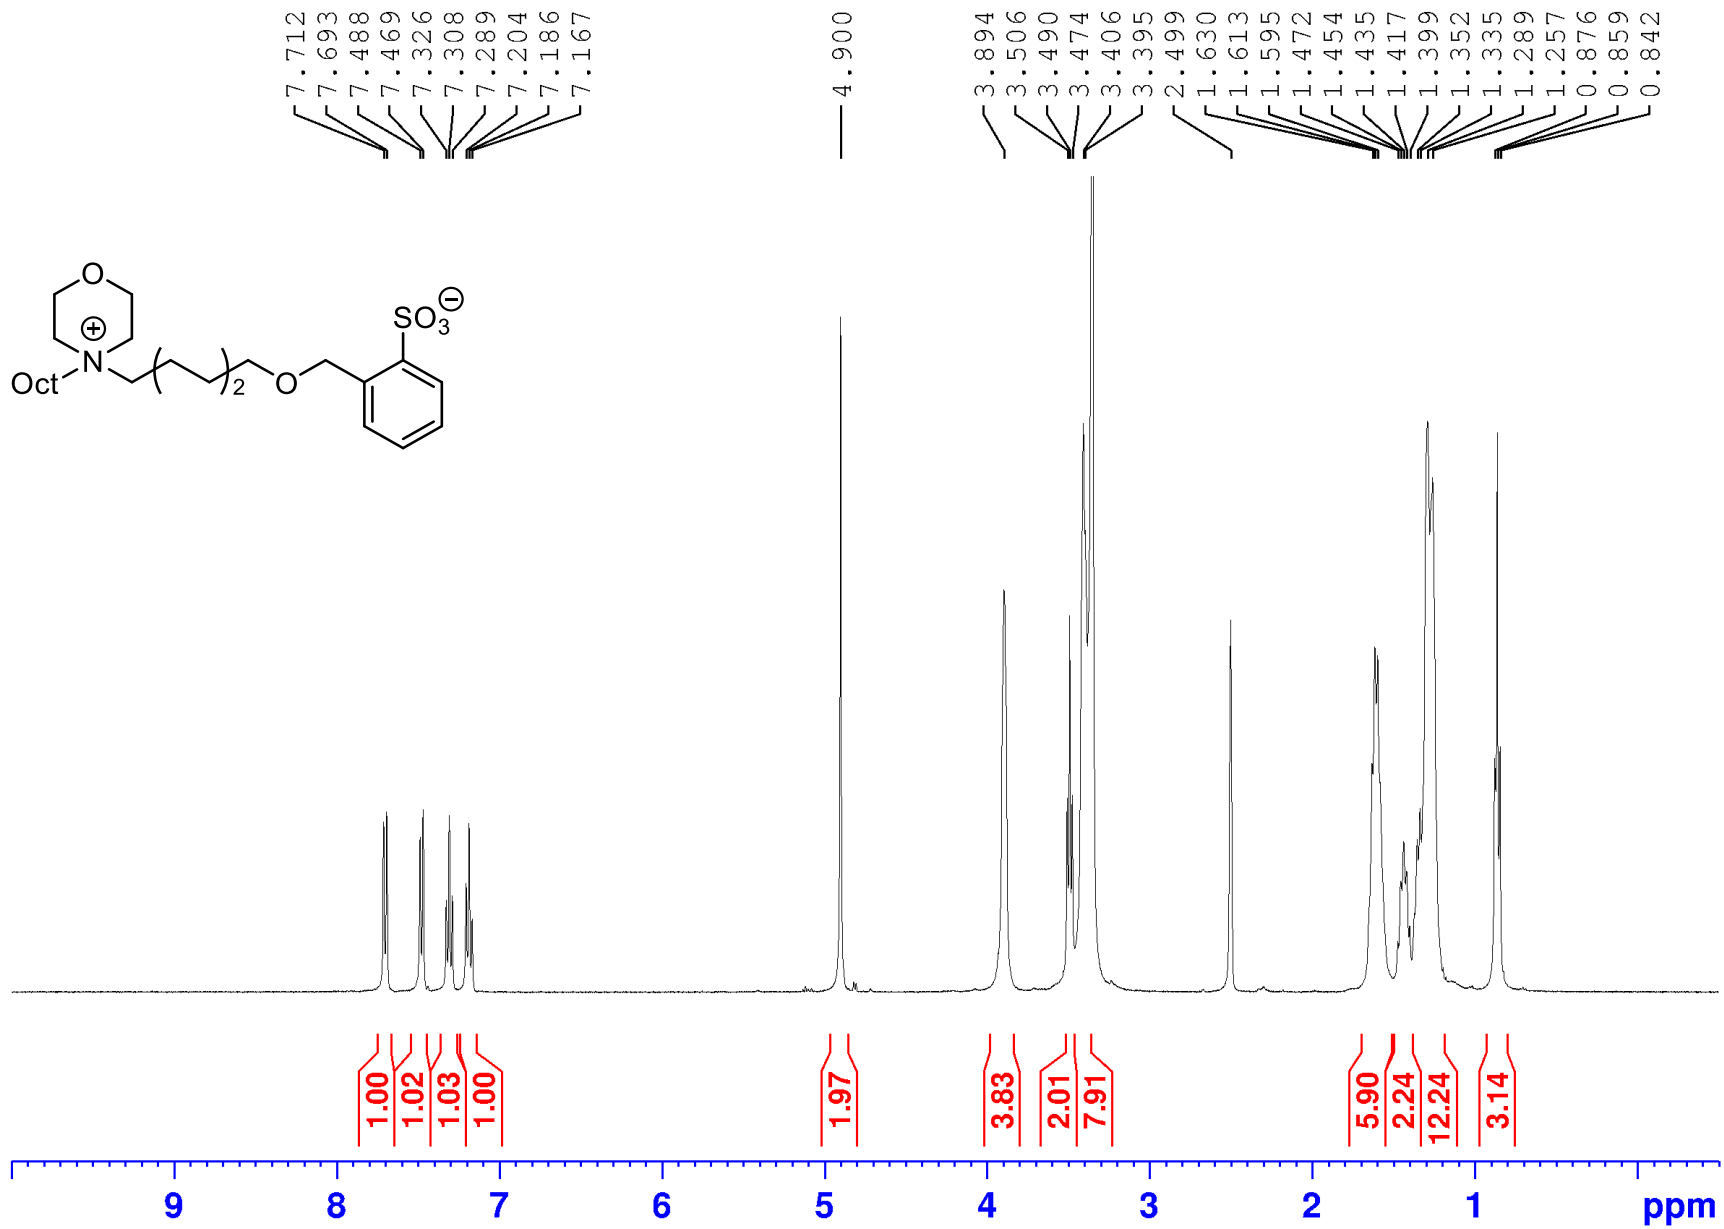

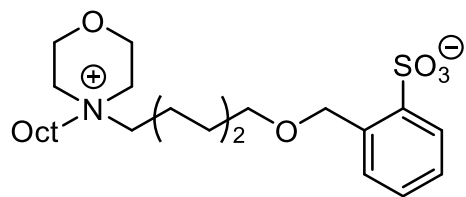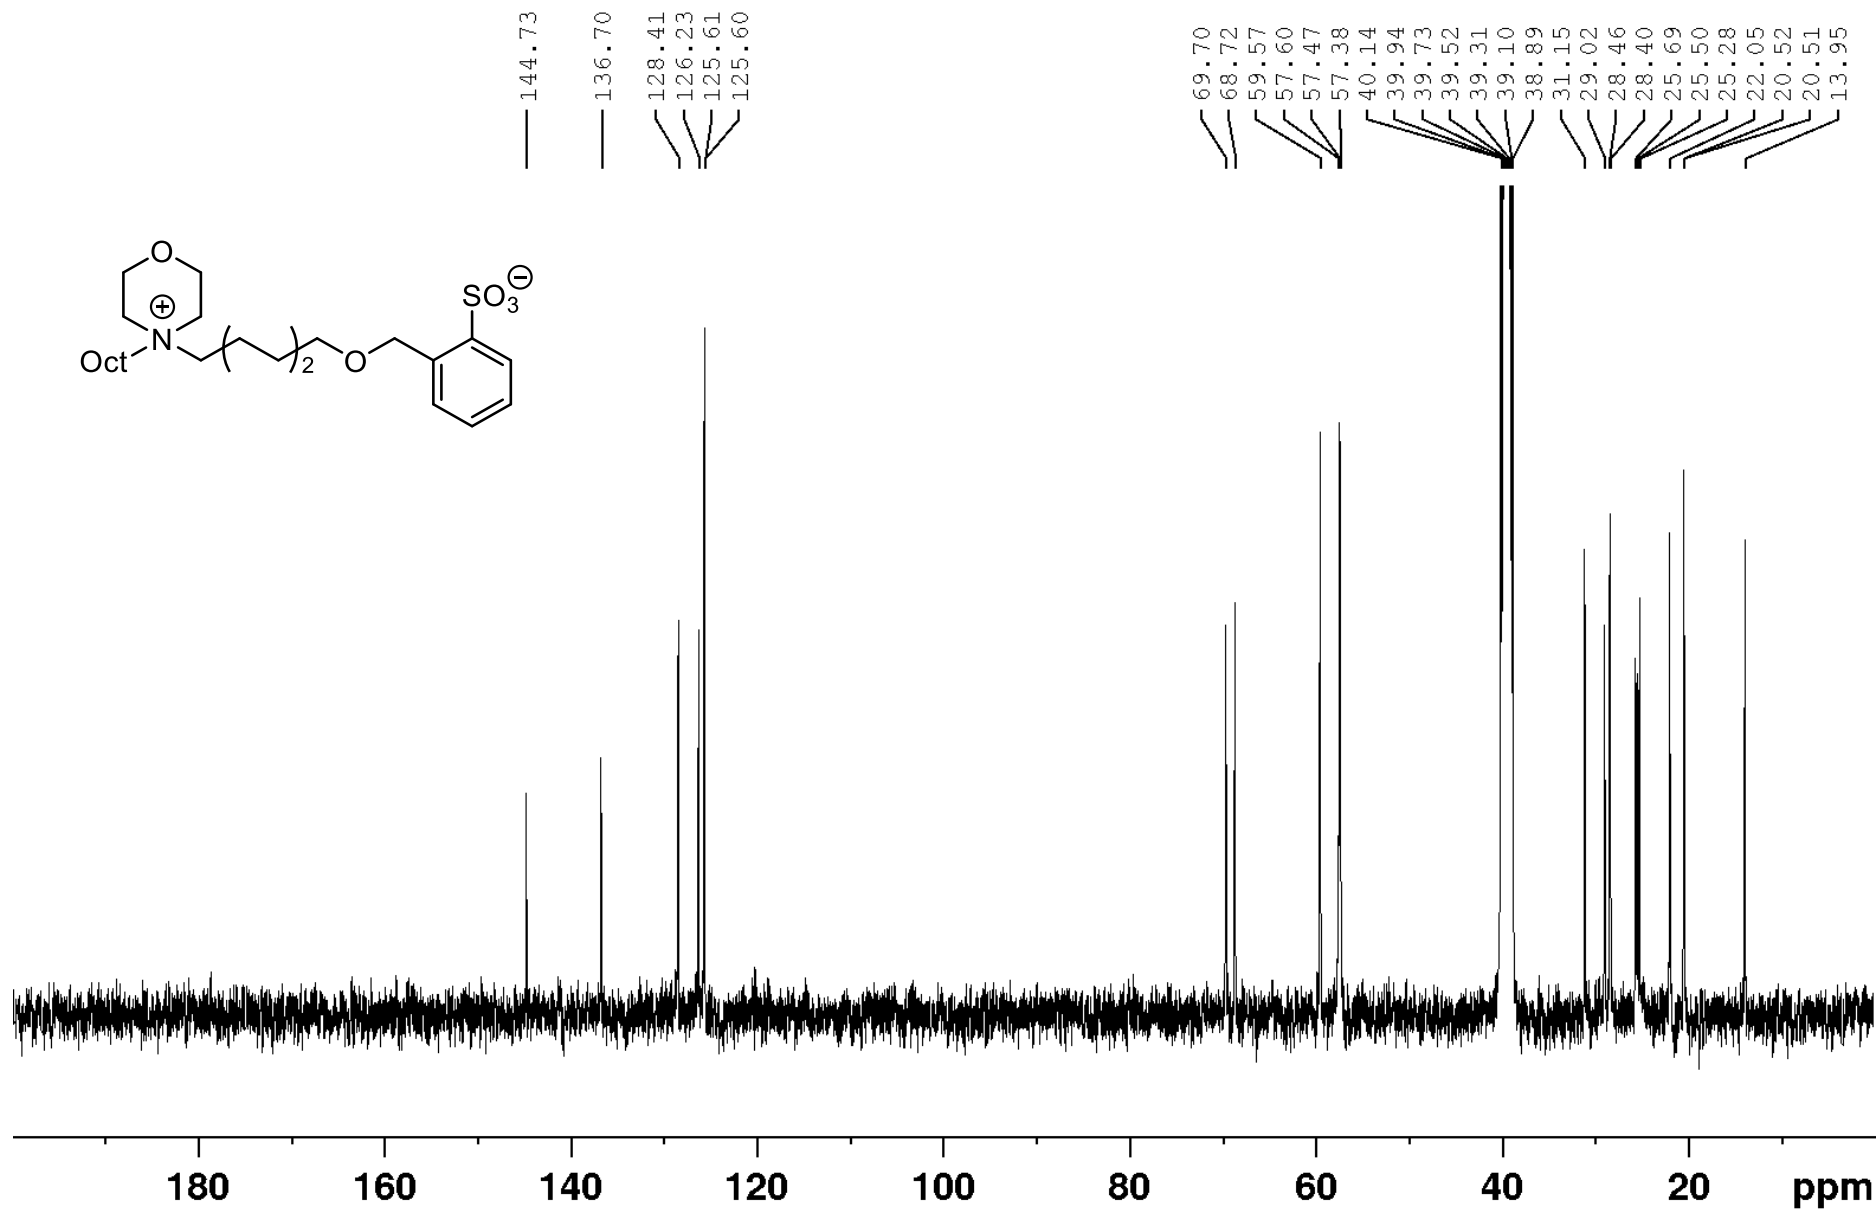

Spectrum

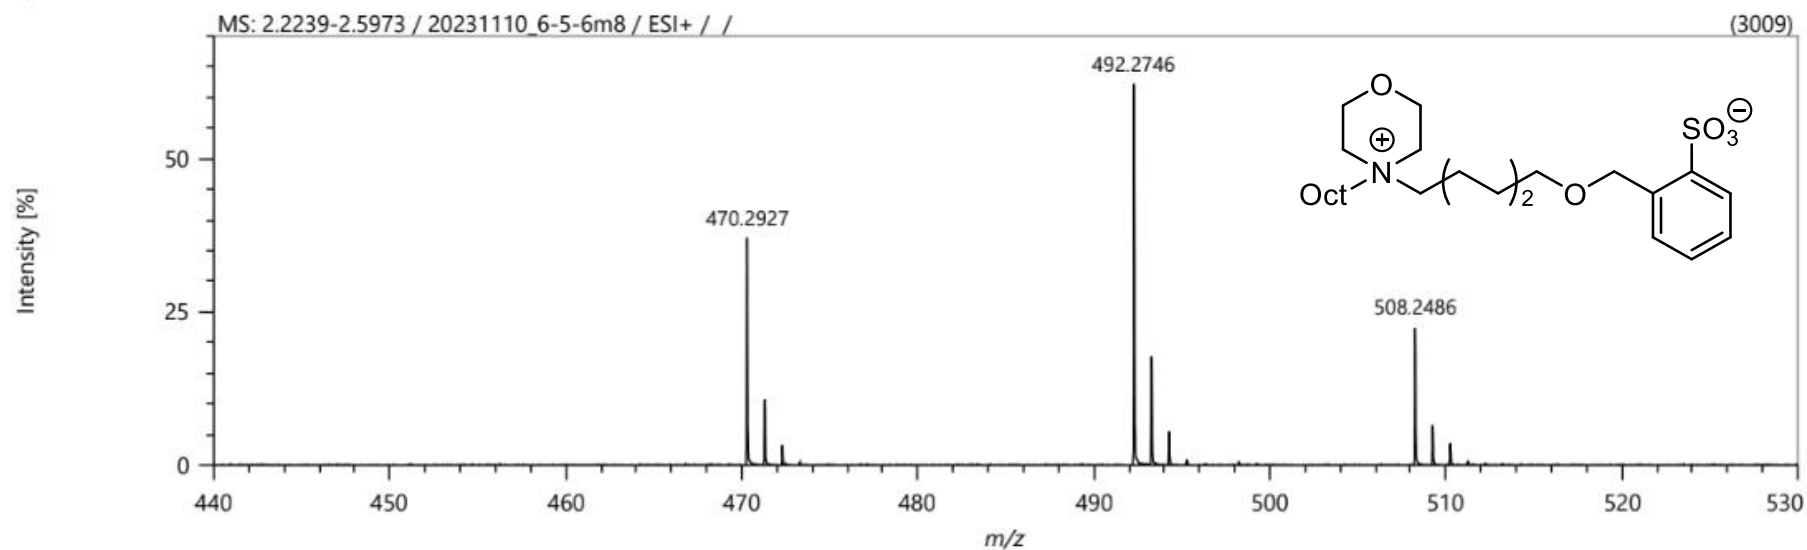

Elemental Composition

Parameters

Tolerance: ±2.00 ppm  
 Electron: Odd/Even  
 Charge: +1  
 DBE: -99.0 - 999.0

Elements Set 2:

| Symbol | C   | H    | O | N | S | Na | K |
|--------|-----|------|---|---|---|----|---|
| Min    | 0   | 0    | 5 | 1 | 1 | 0  | 0 |
| Max    | 400 | 1000 | 5 | 1 | 1 | 1  | 1 |

Results

| Mass      | Formula                                               | Calculated Mass | Mass Difference [mDa] | Mass Difference [ppm] | DBE |
|-----------|-------------------------------------------------------|-----------------|-----------------------|-----------------------|-----|
| 470.29273 | C <sub>25</sub> H <sub>44</sub> N O <sub>5</sub> S    | 470.29347       | -0.74                 | -1.57                 | 4.5 |
| 492.27463 | C <sub>25</sub> H <sub>43</sub> N O <sub>5</sub> Na S | 492.27542       | -0.79                 | -1.60                 | 4.5 |
| 508.24858 | C <sub>25</sub> H <sub>43</sub> N O <sub>5</sub> S K  | 508.24935       | -0.77                 | -1.52                 | 4.5 |

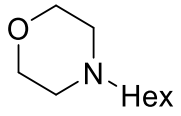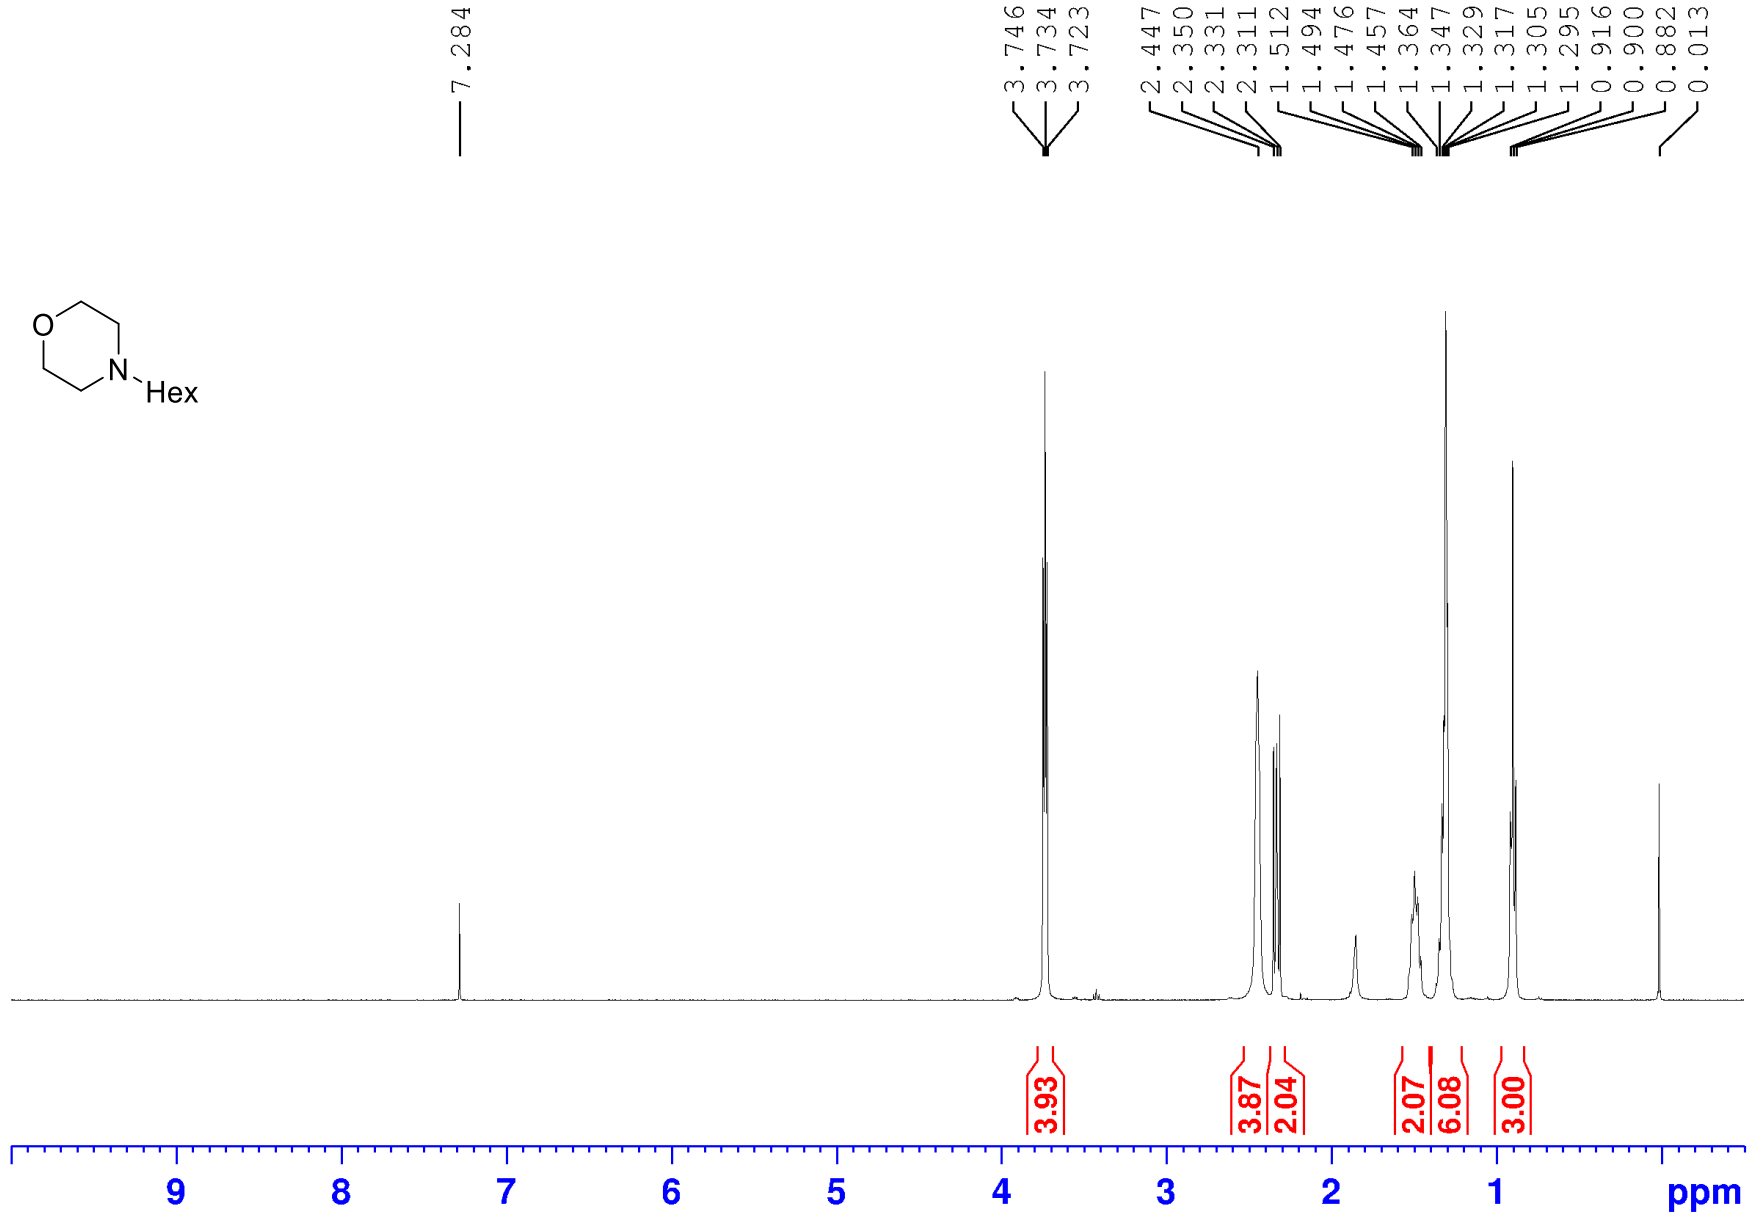



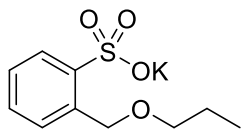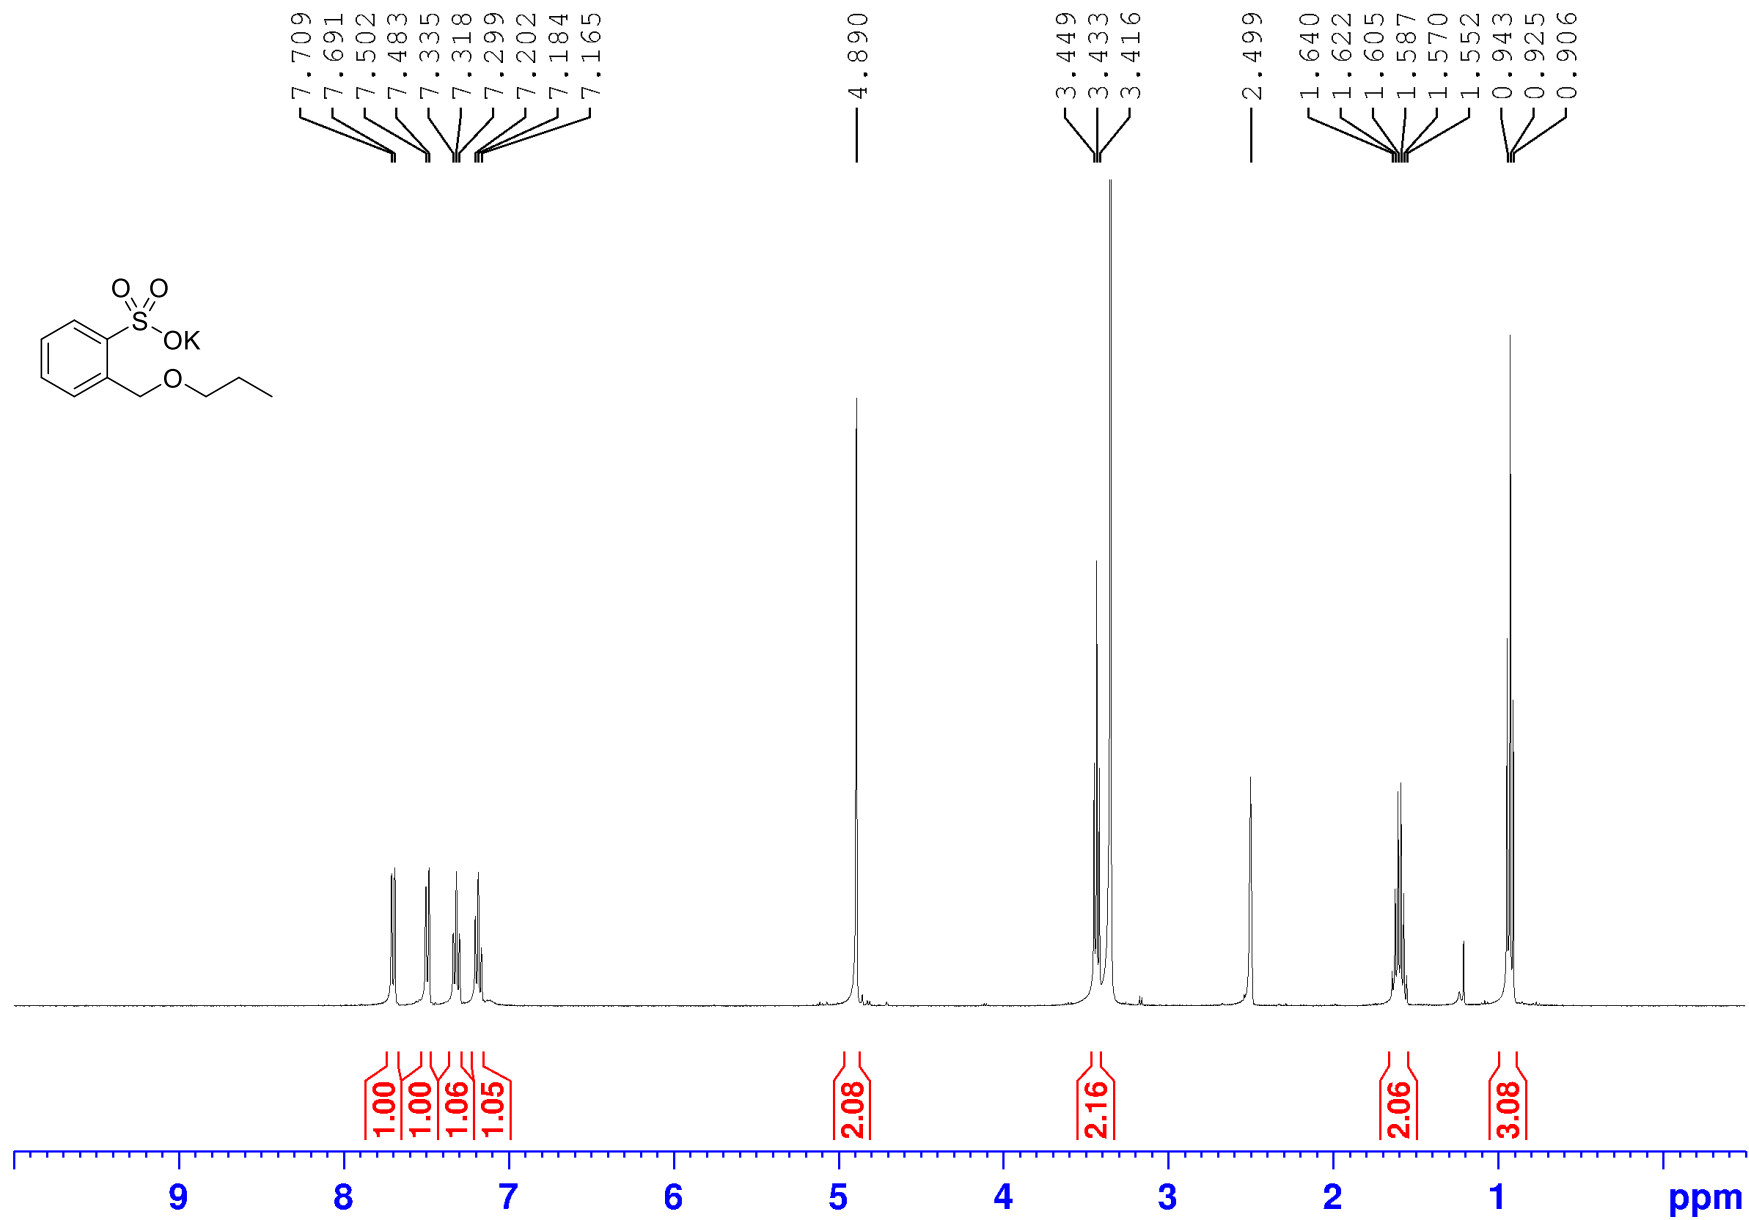

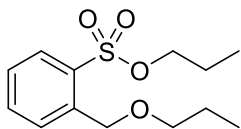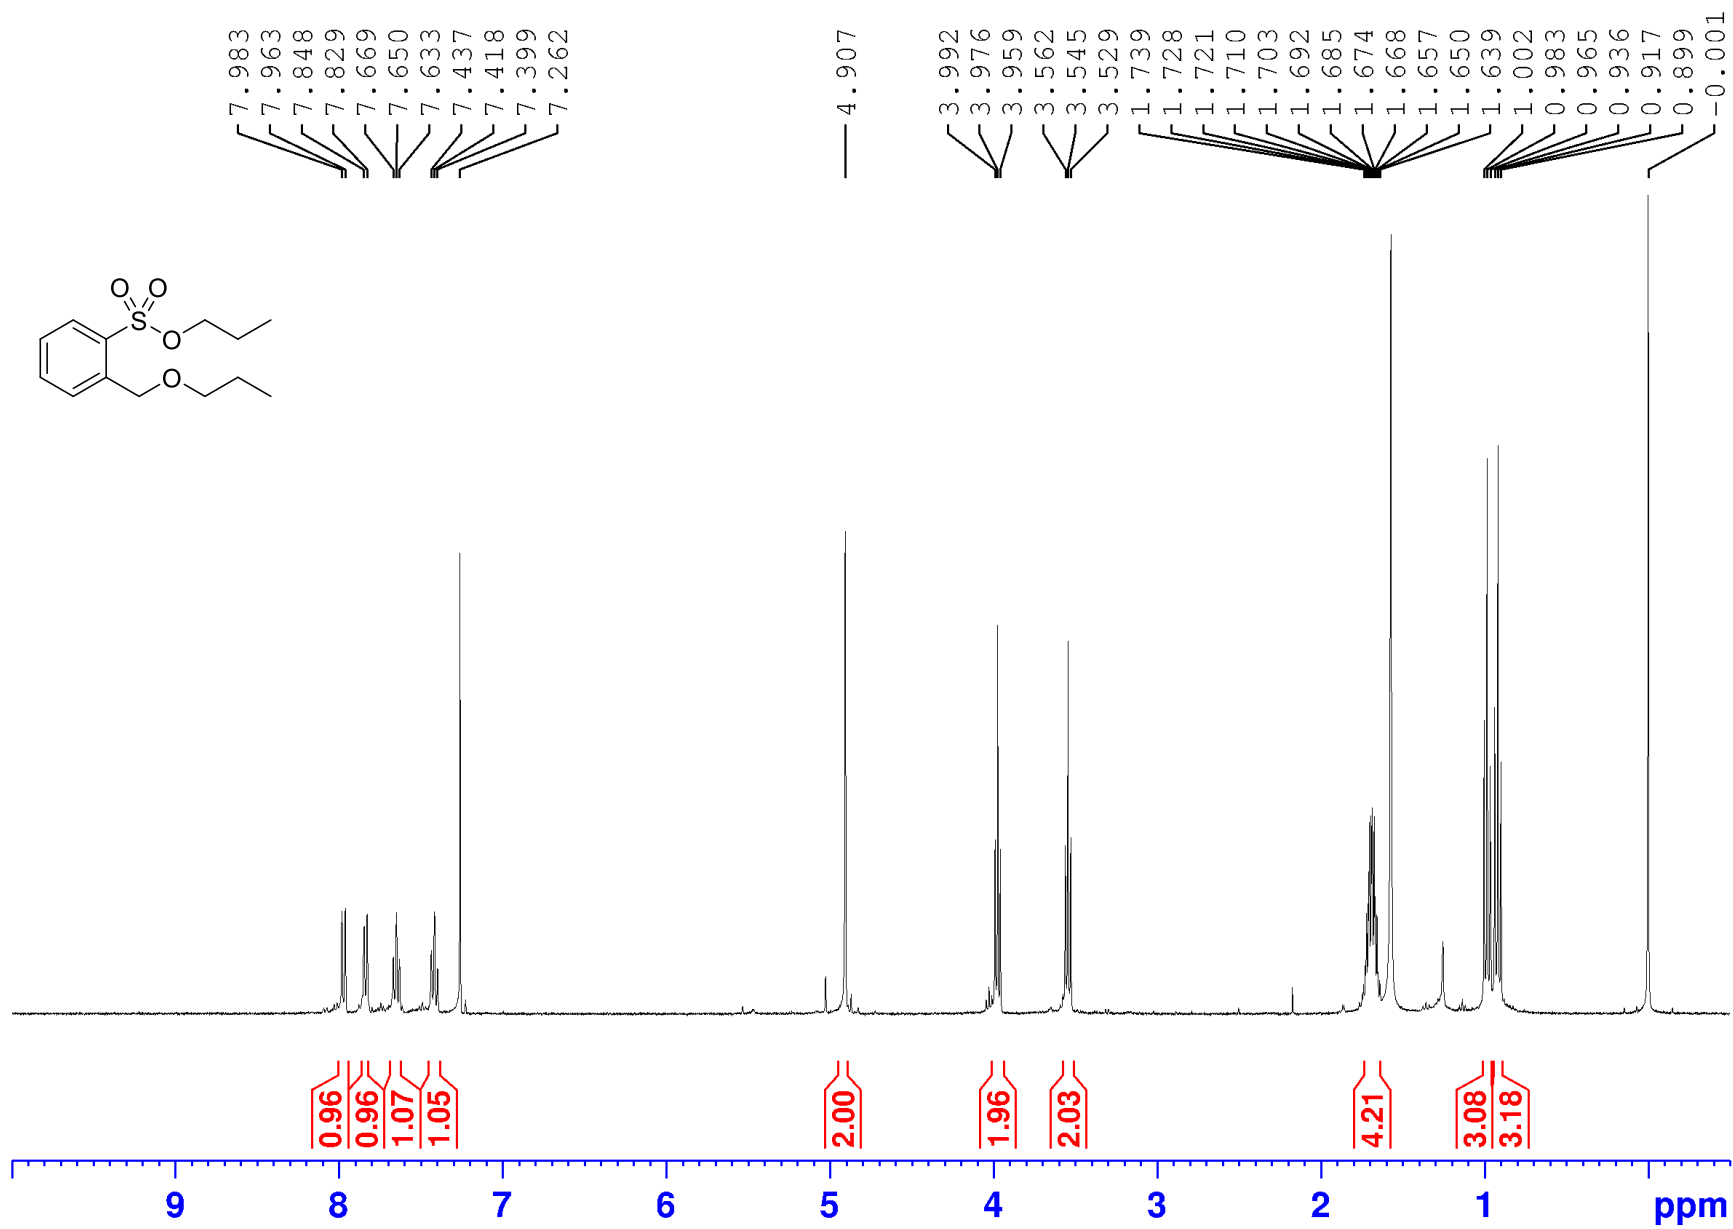

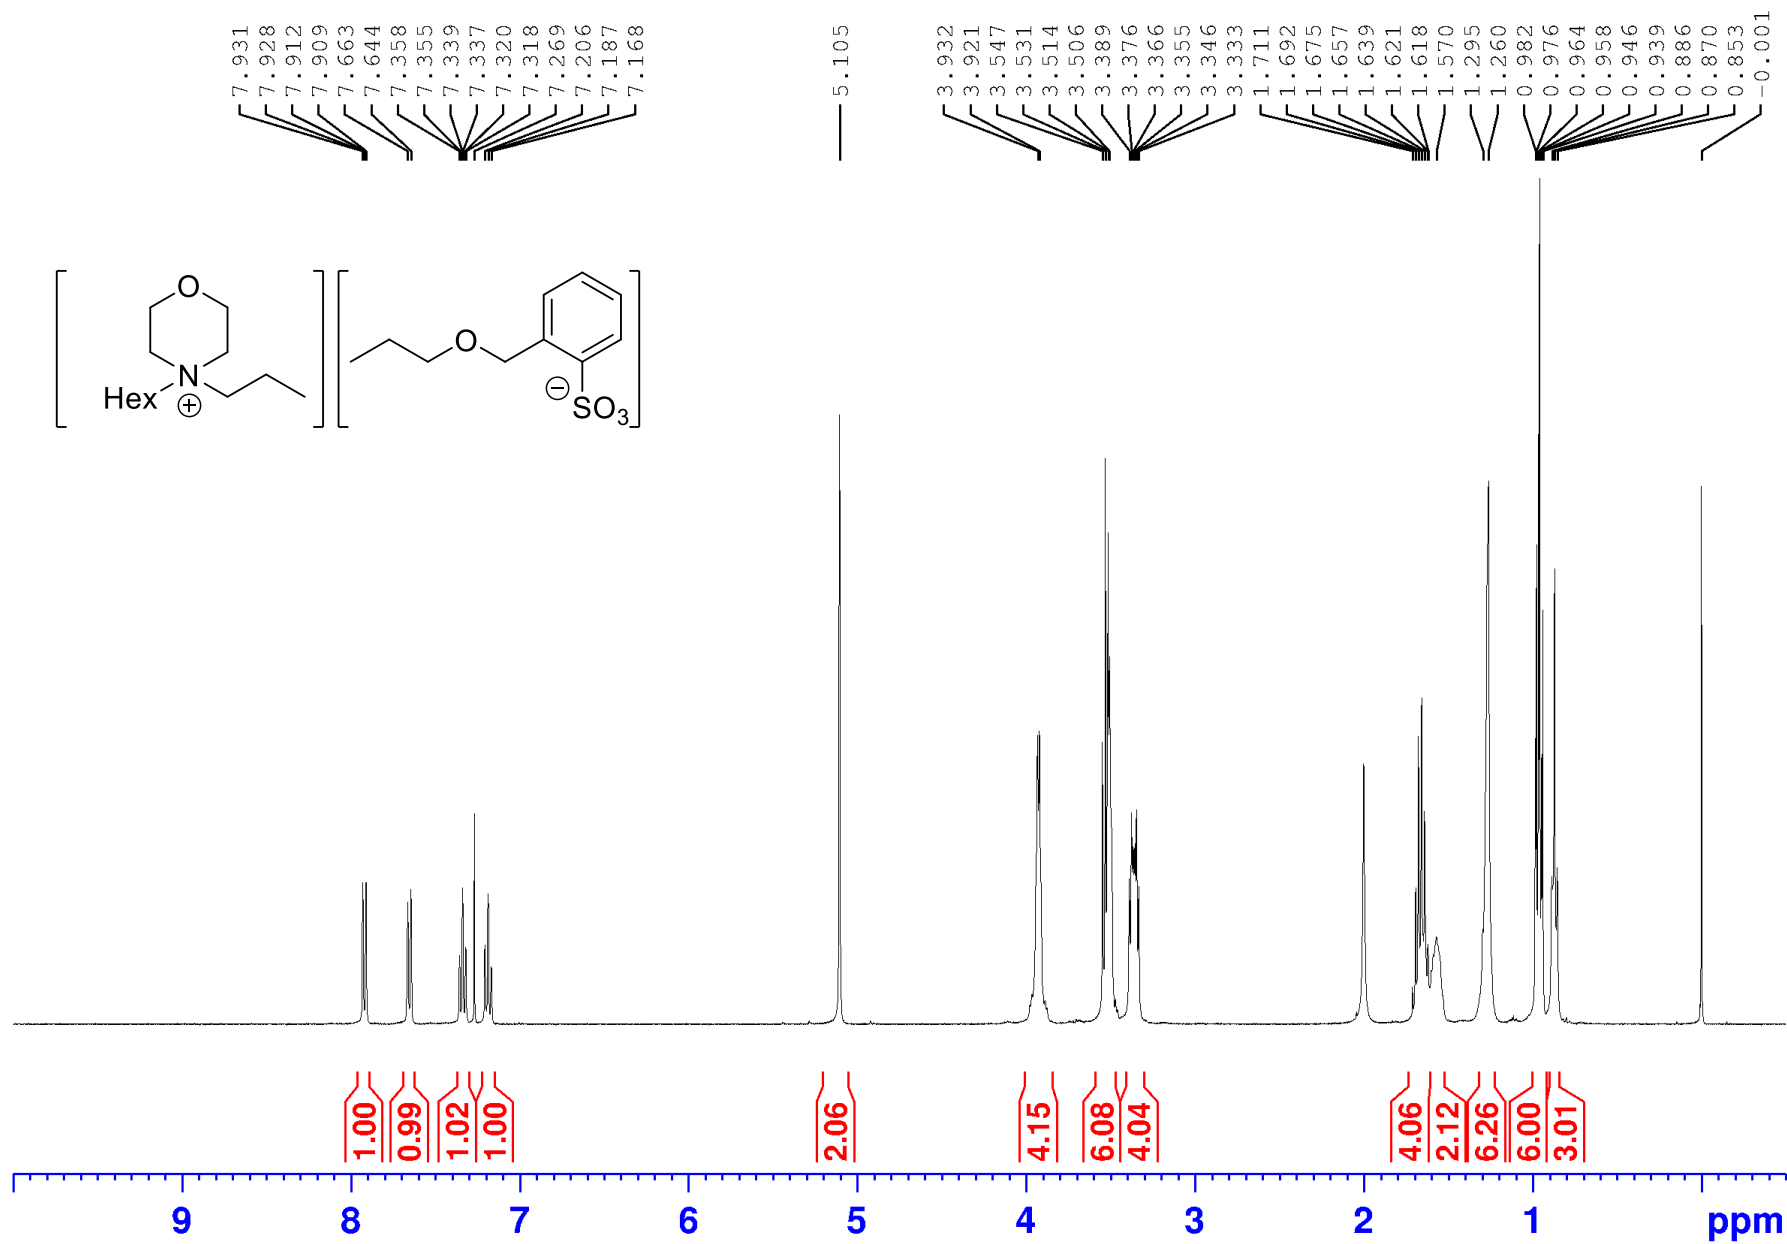

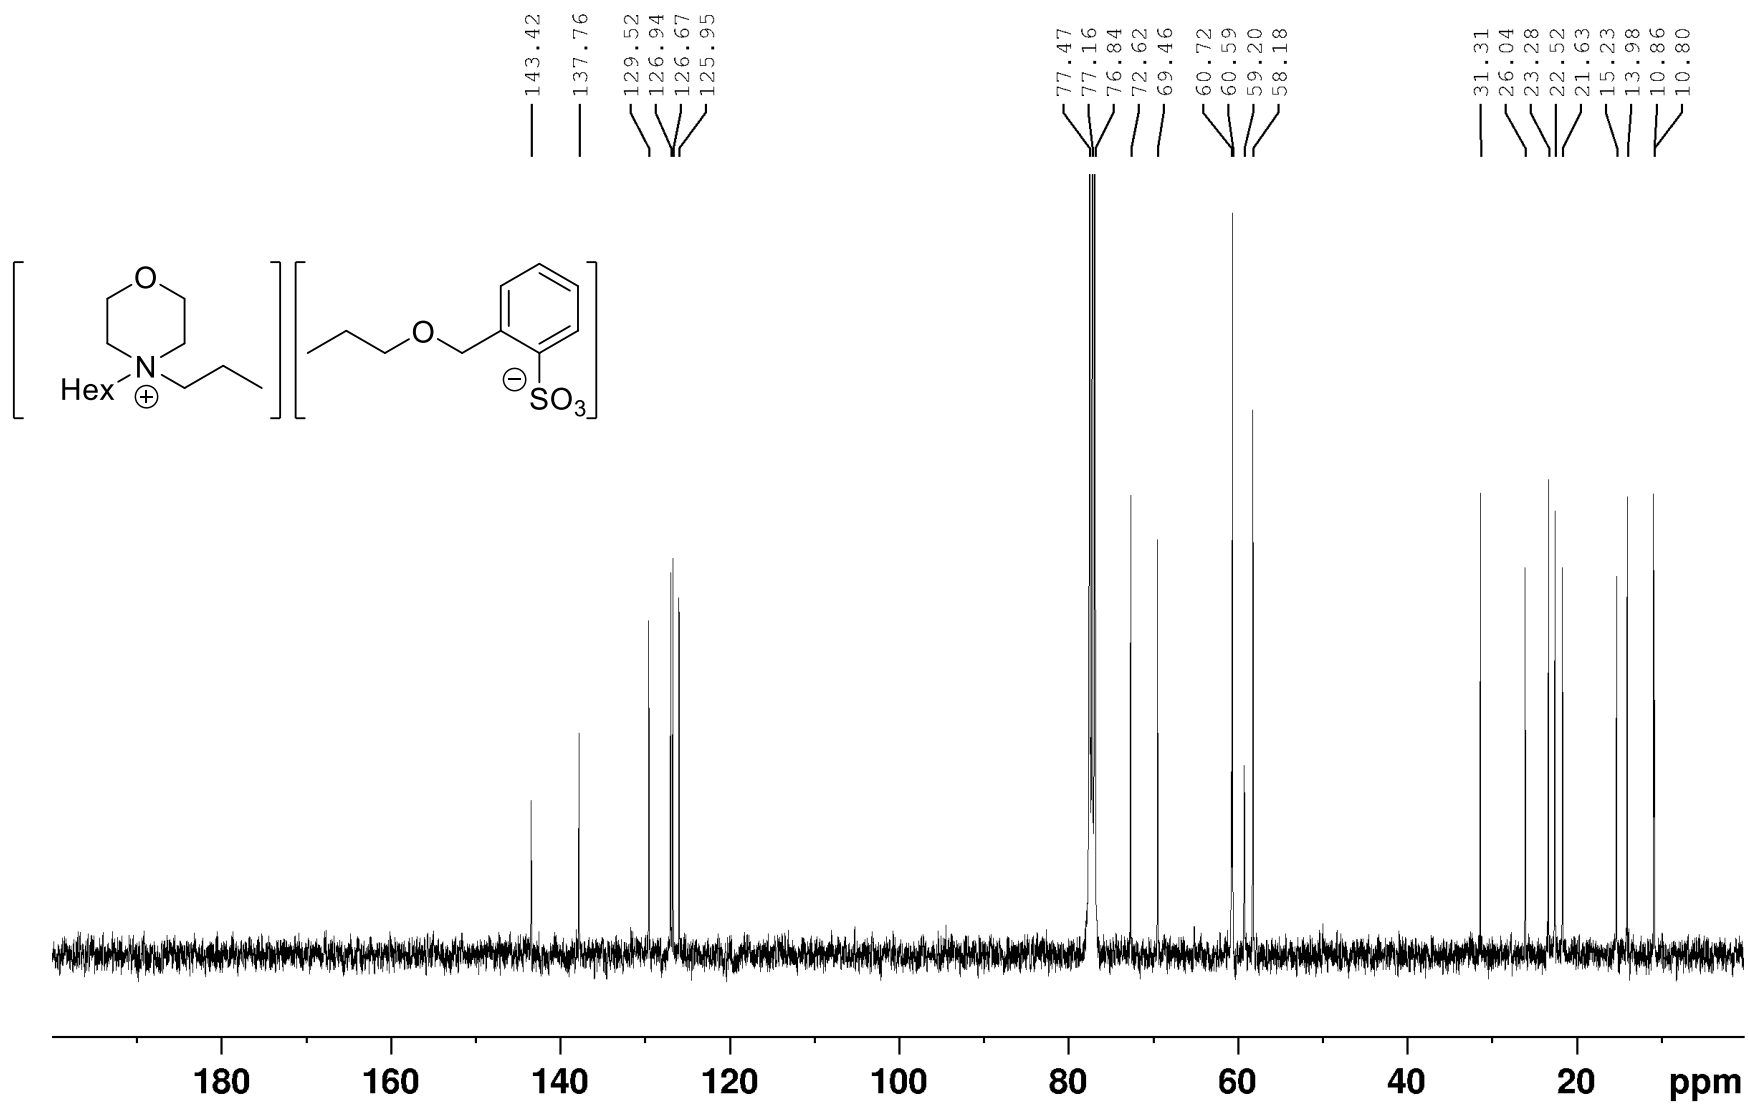

Spectrum

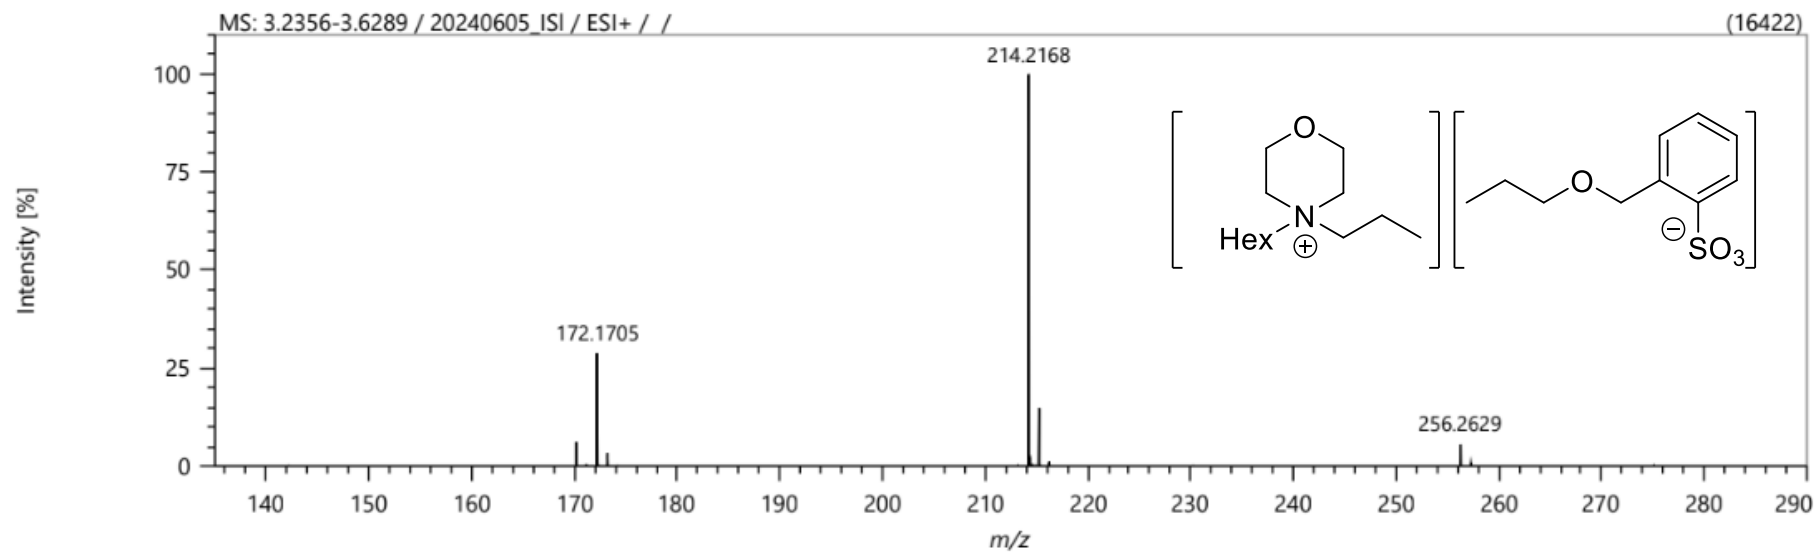

Elemental Composition

Parameters

Tolerance:  $\pm 10.00$  ppm  
 Electron: Odd/Even  
 Charge: +1  
 DBE: -99.0 - 999.0

Elements Set 2:

| Symbol | C   | H    | O | N |
|--------|-----|------|---|---|
| Min    | 0   | 0    | 1 | 1 |
| Max    | 400 | 1000 | 1 | 1 |

Results

| Mass      | Formula                             | Calculated Mass | Mass Difference [mDa] | Mass Difference [ppm] | DBE |
|-----------|-------------------------------------|-----------------|-----------------------|-----------------------|-----|
| 214.21678 | C <sub>13</sub> H <sub>28</sub> N O | 214.21654       | 0.24                  | 1.13                  | 0.5 |
